# Supplementary material
Source: Research Square preprint supplement (doi:10.21203/rs.3.rs-9611862/v1)
Supplement: Supplementary file 1 [file a2c1c28091d9340148e9854f.docx]

##
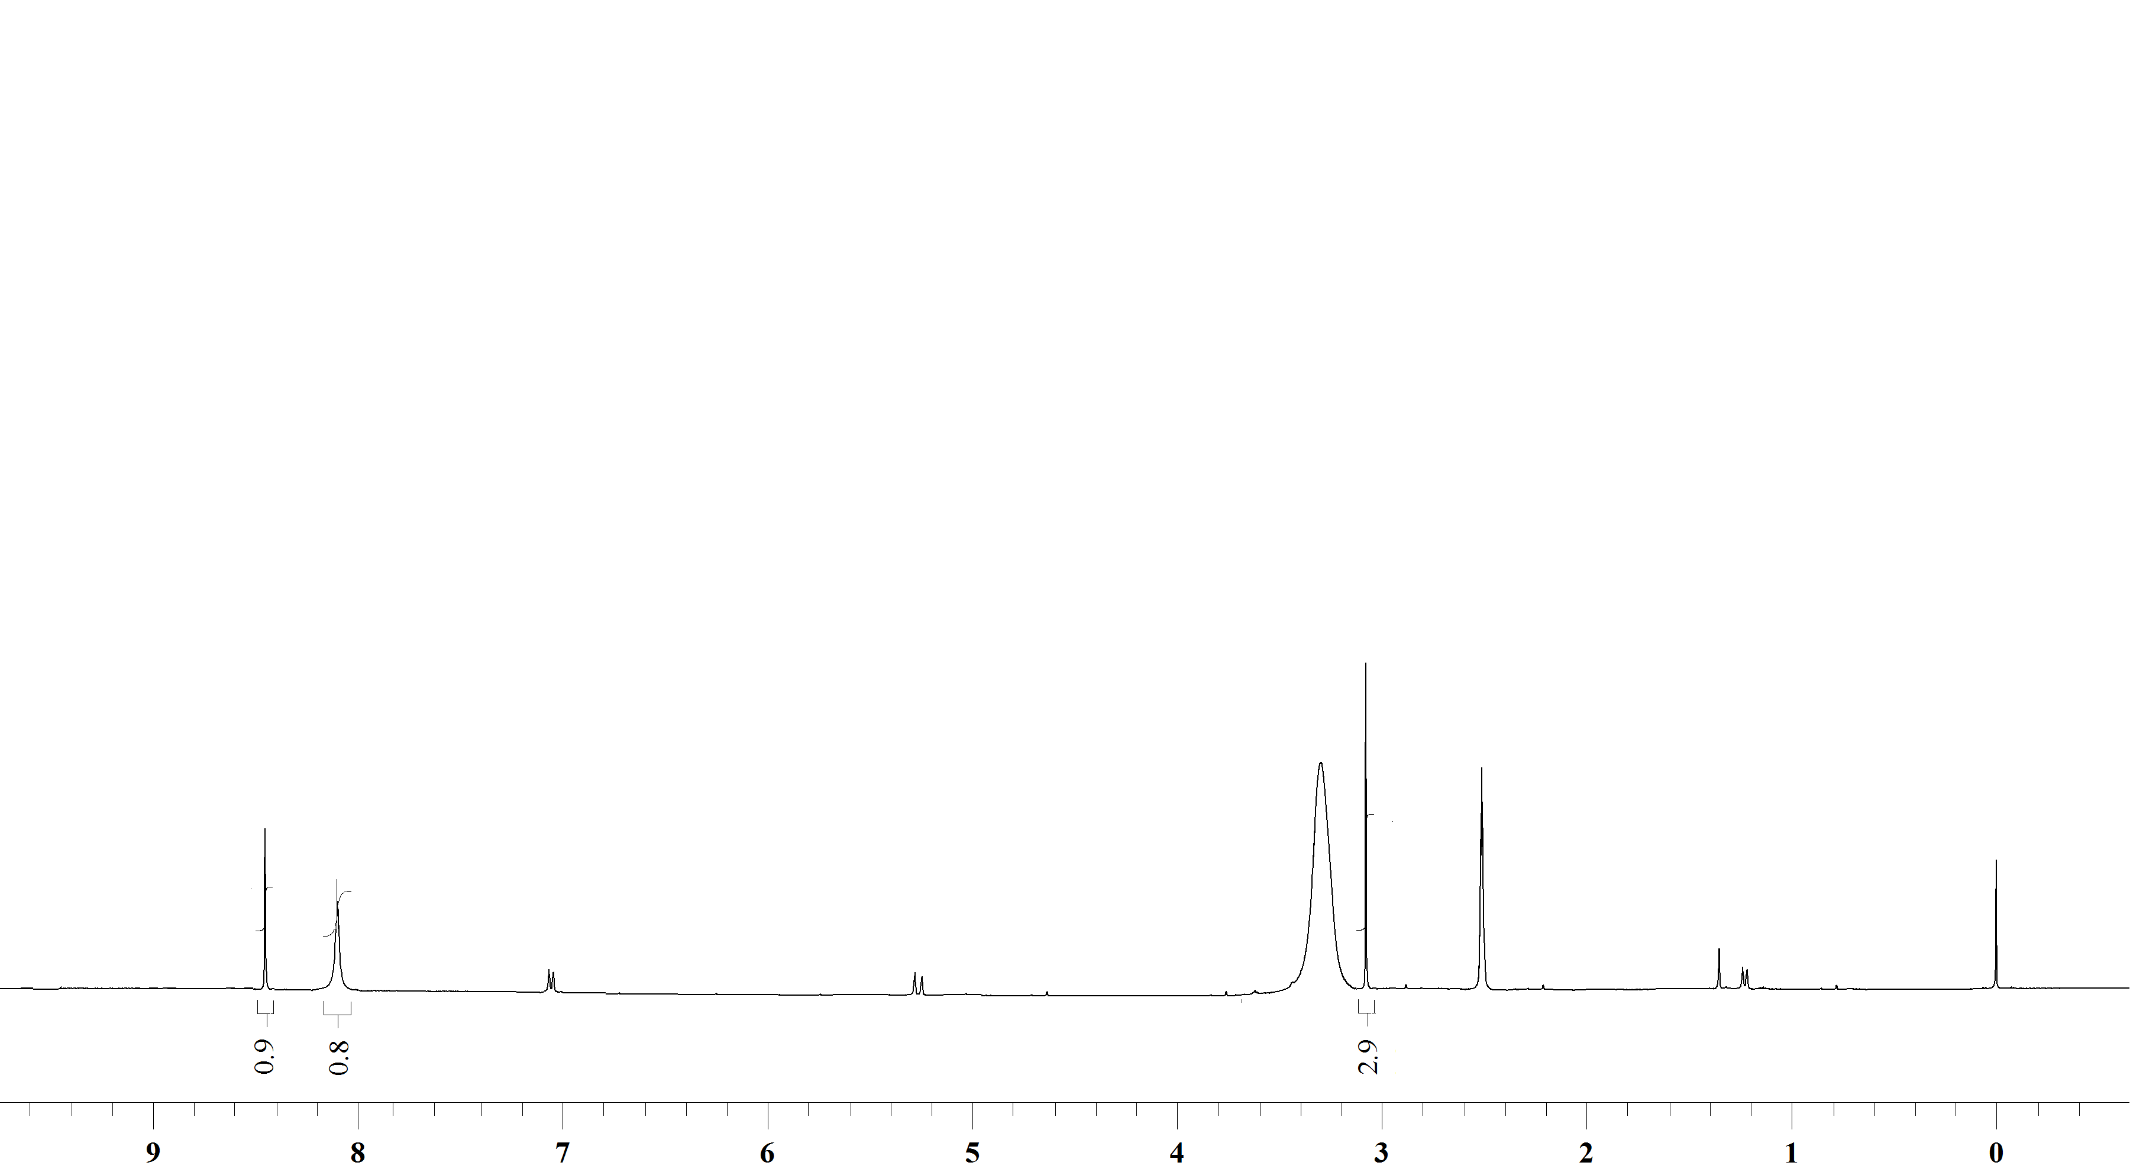


**1H NMR Spectrum of compound 21 in DMSO-*d6*(400 MHz)**


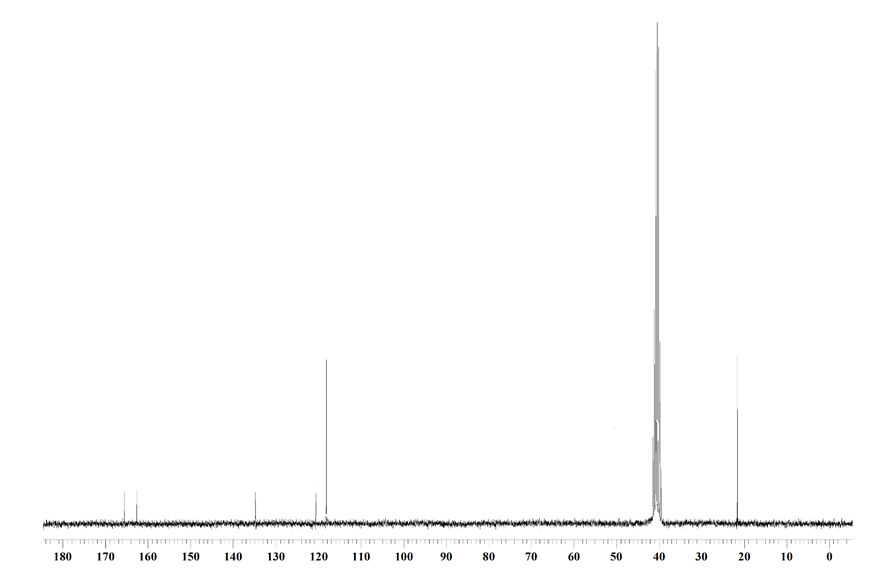


**13C NMR Spectrum of compound 21 in DMSO-*d6*(100 MHz)**


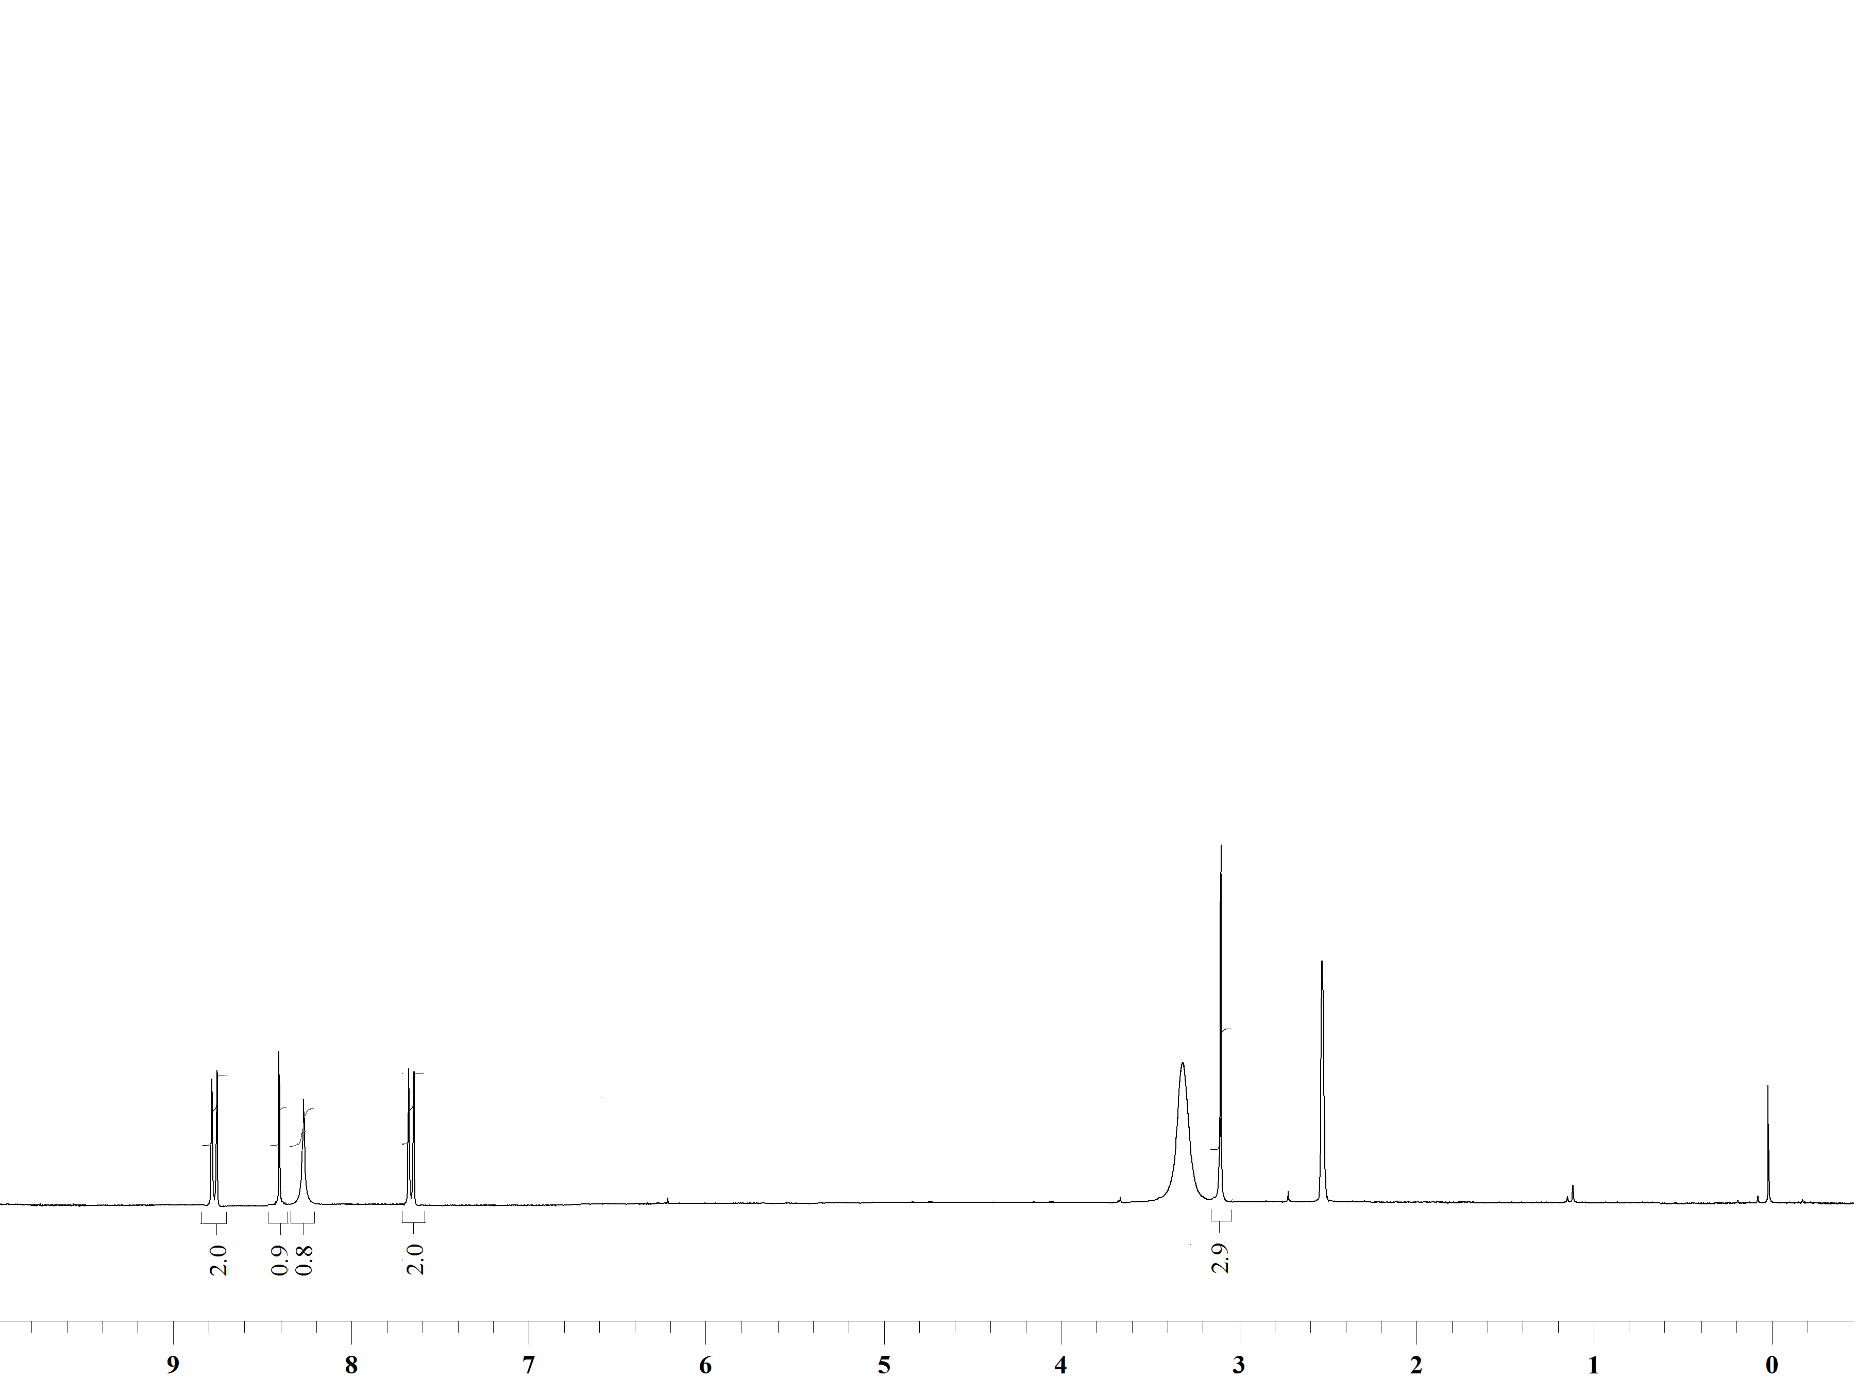


**1H NMR Spectrum of compound 23 in DMSO-*d6*(400 MHz)**


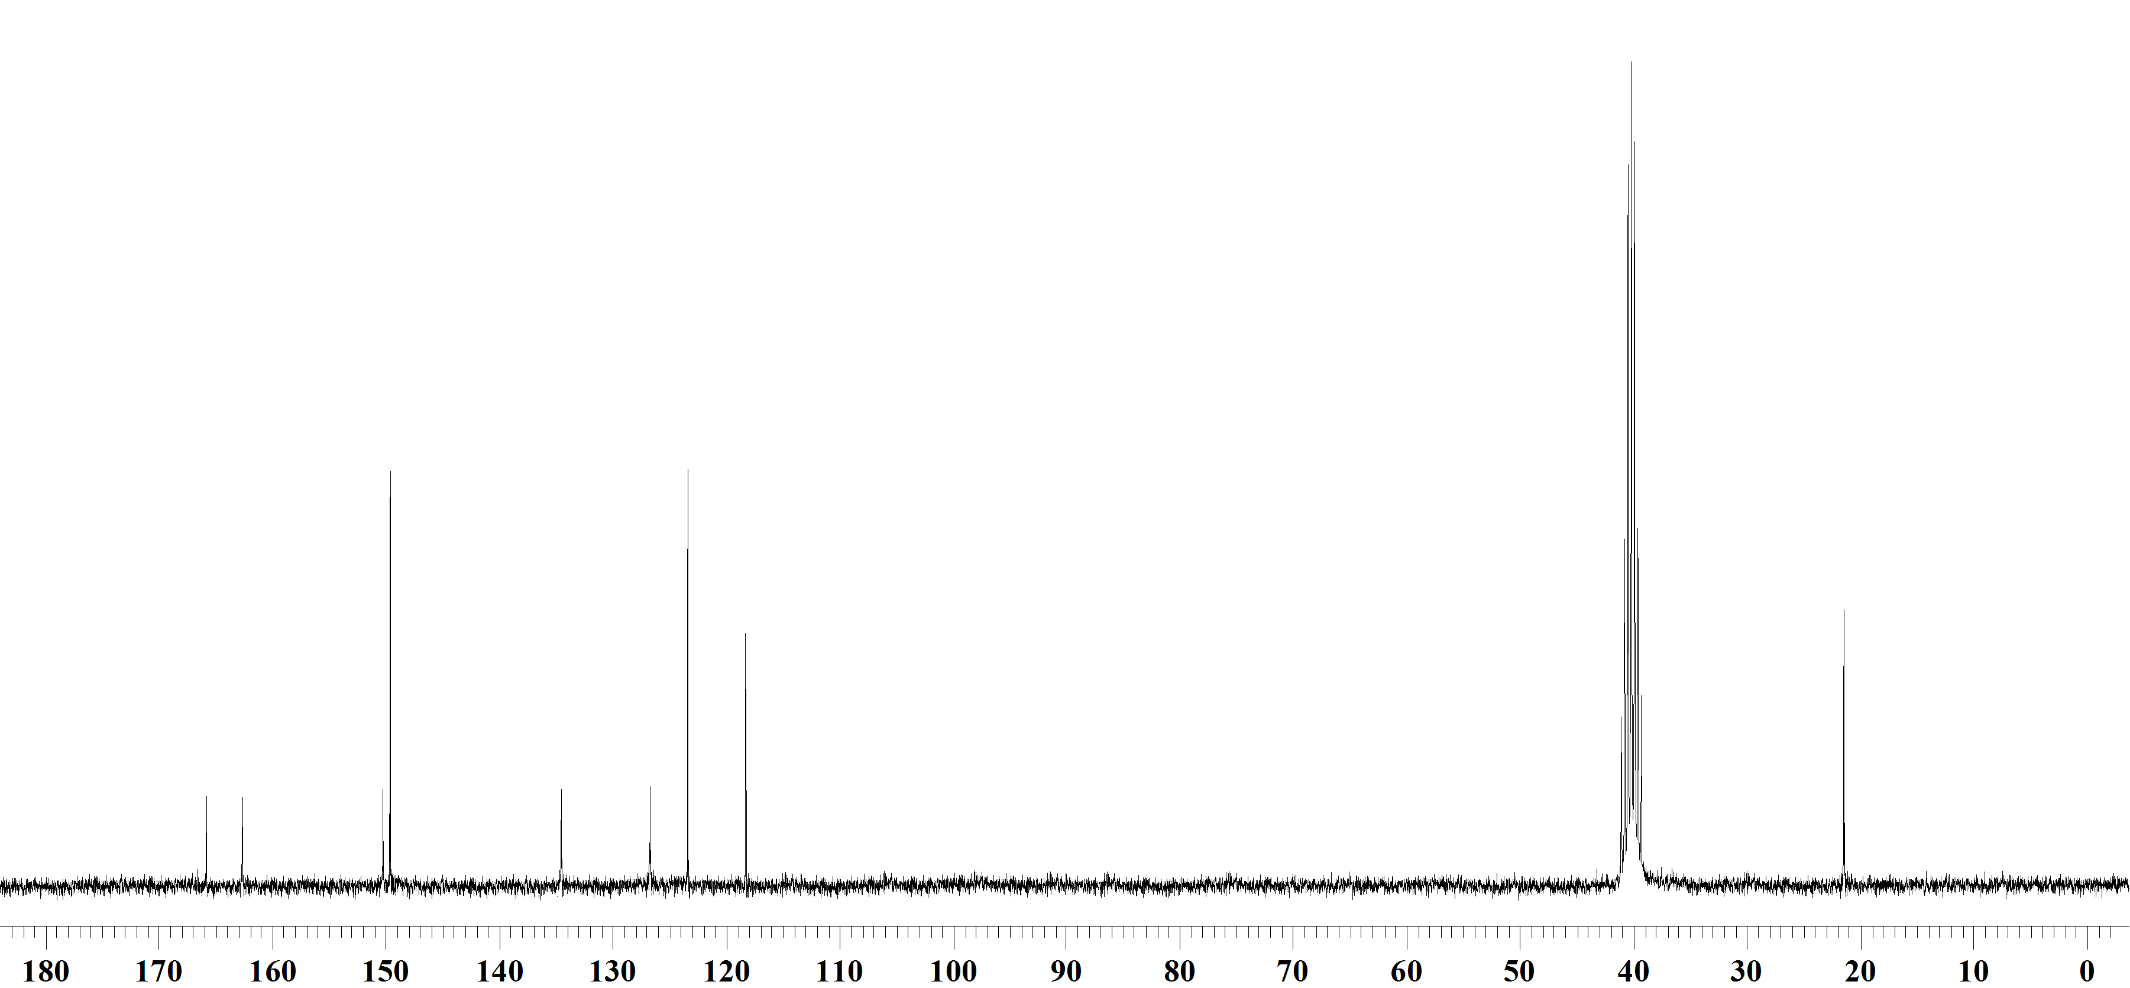


**13C NMR Spectrum of compound 23 in DMSO-*d6*(100 MHz)**


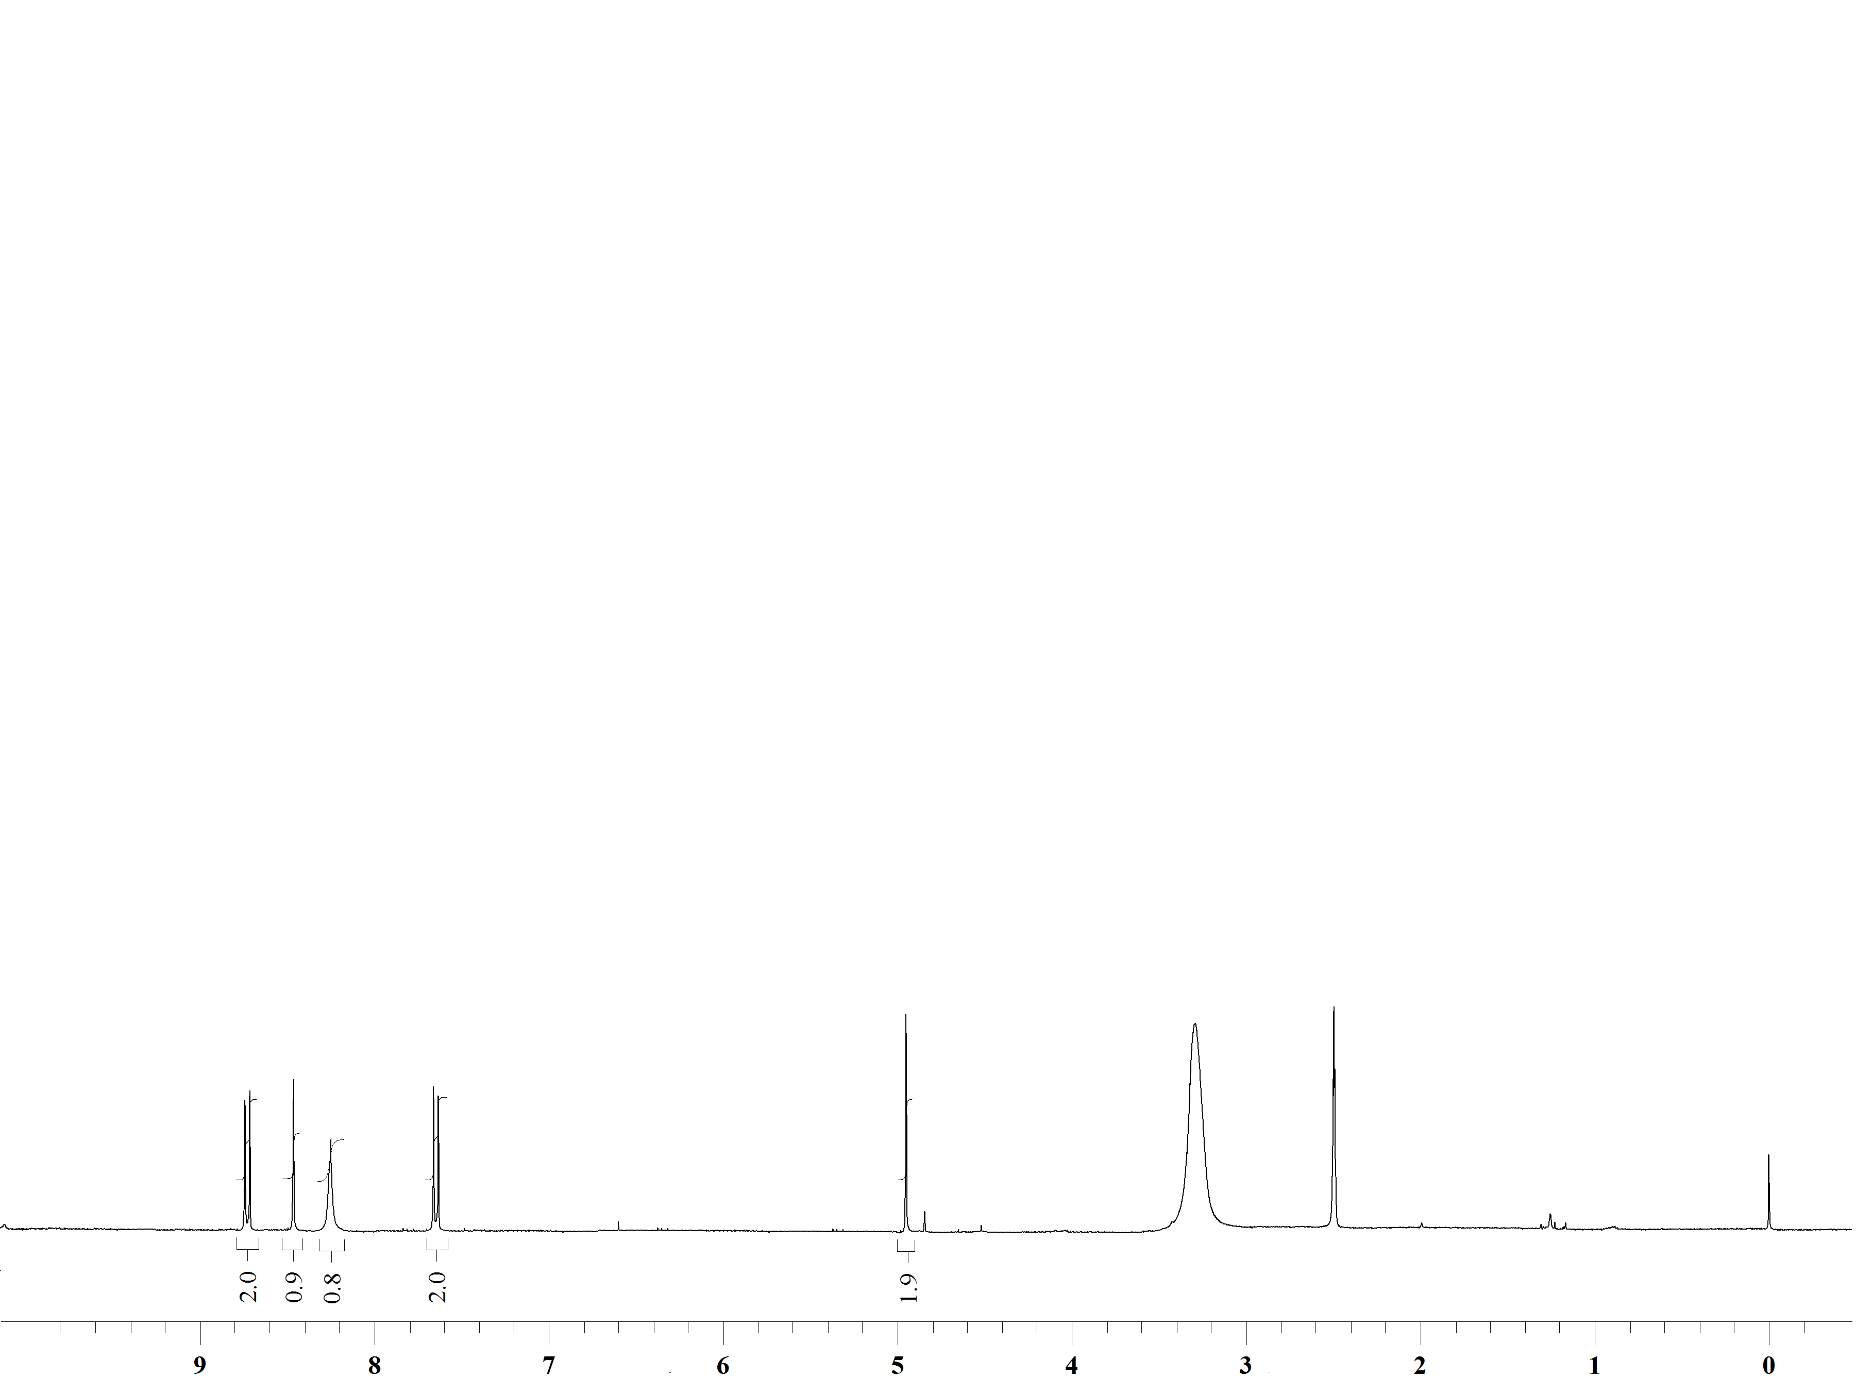


**1H NMR Spectrum of compound 24 in DMSO-*d6*(400 MHz)**


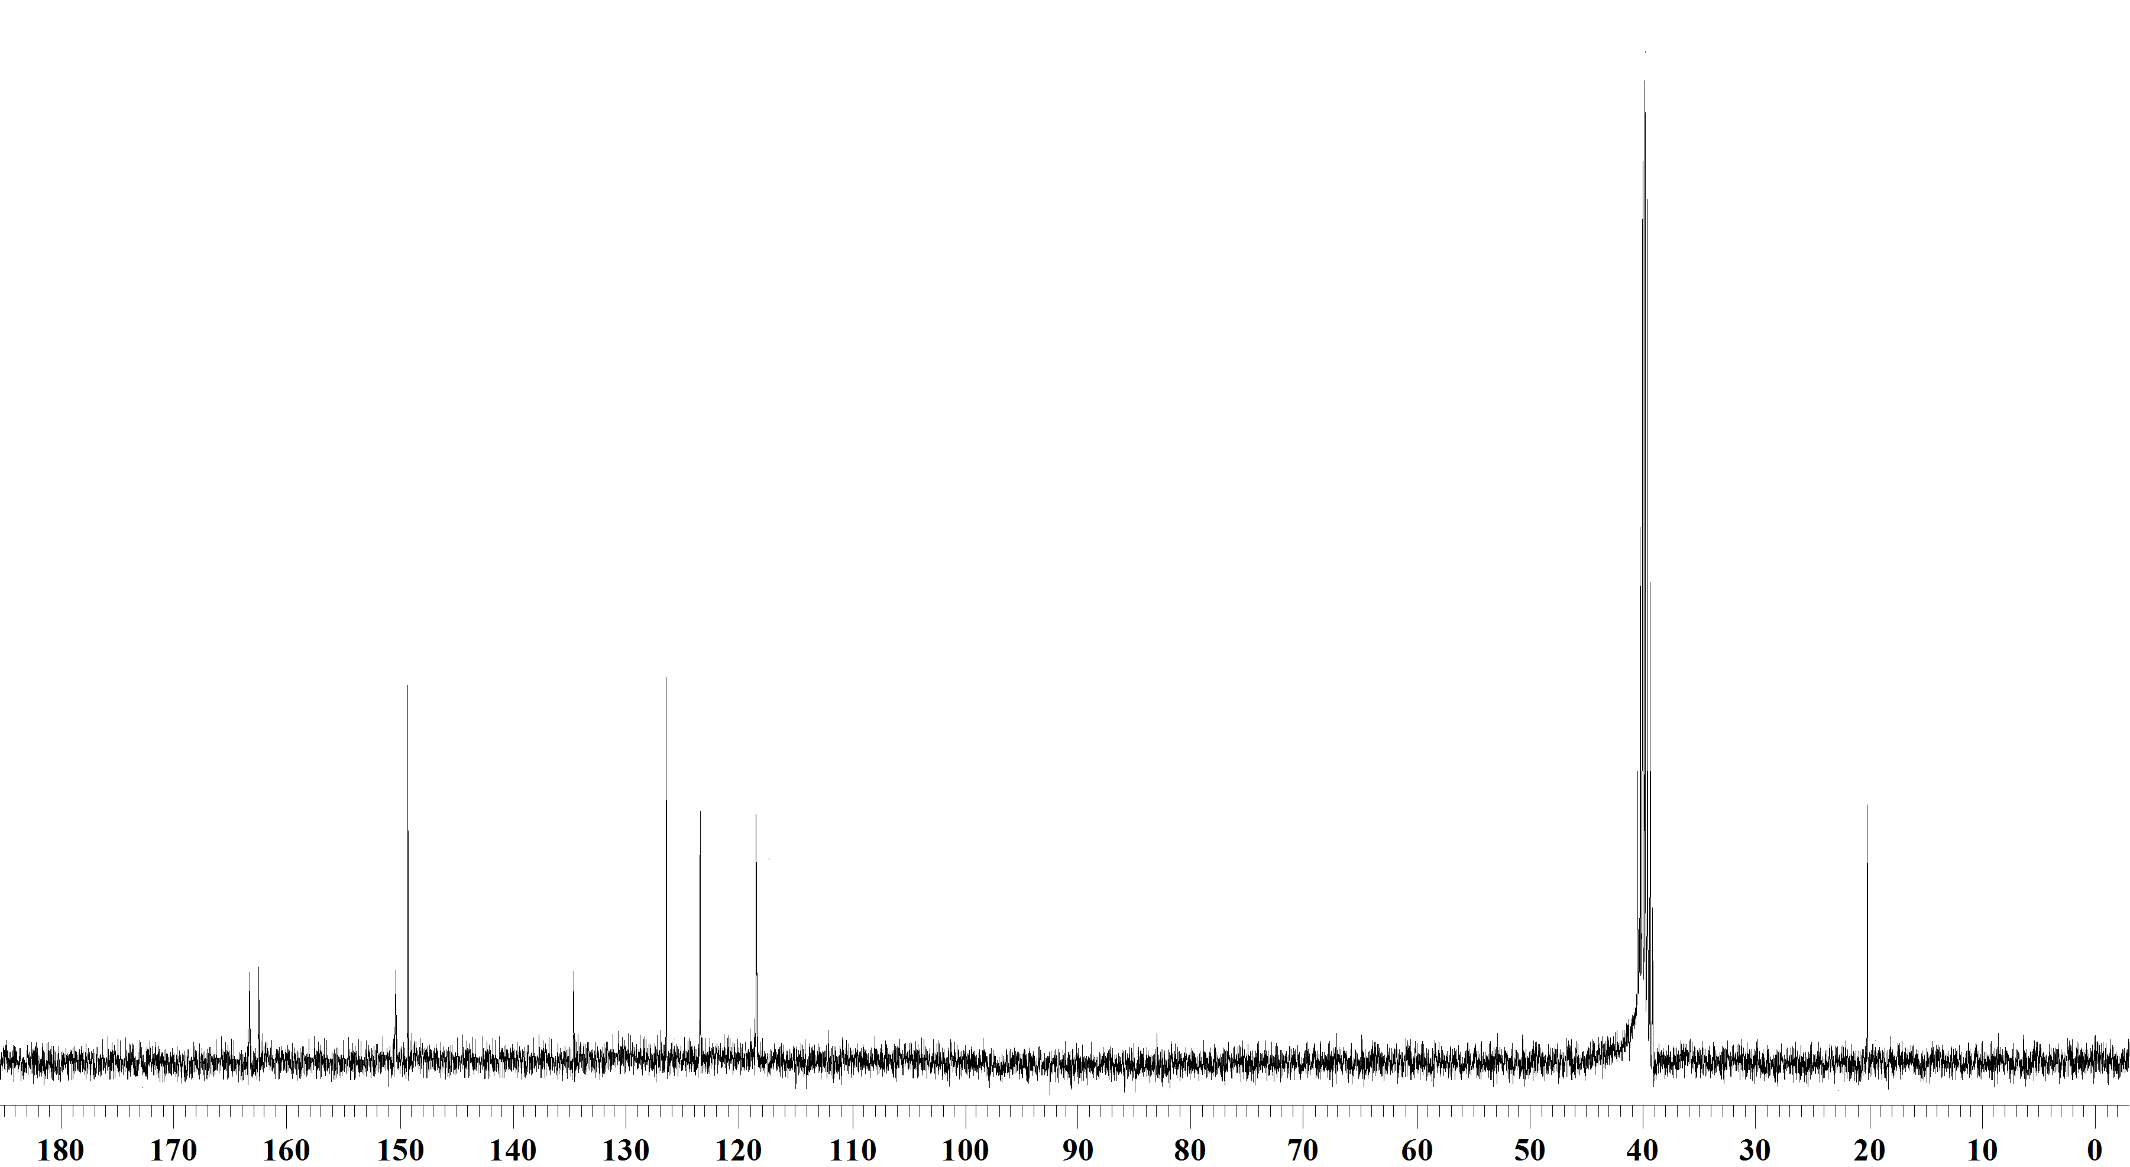


**13C NMR Spectrum of compound 24 in DMSO-*d6*(100 MHz)**


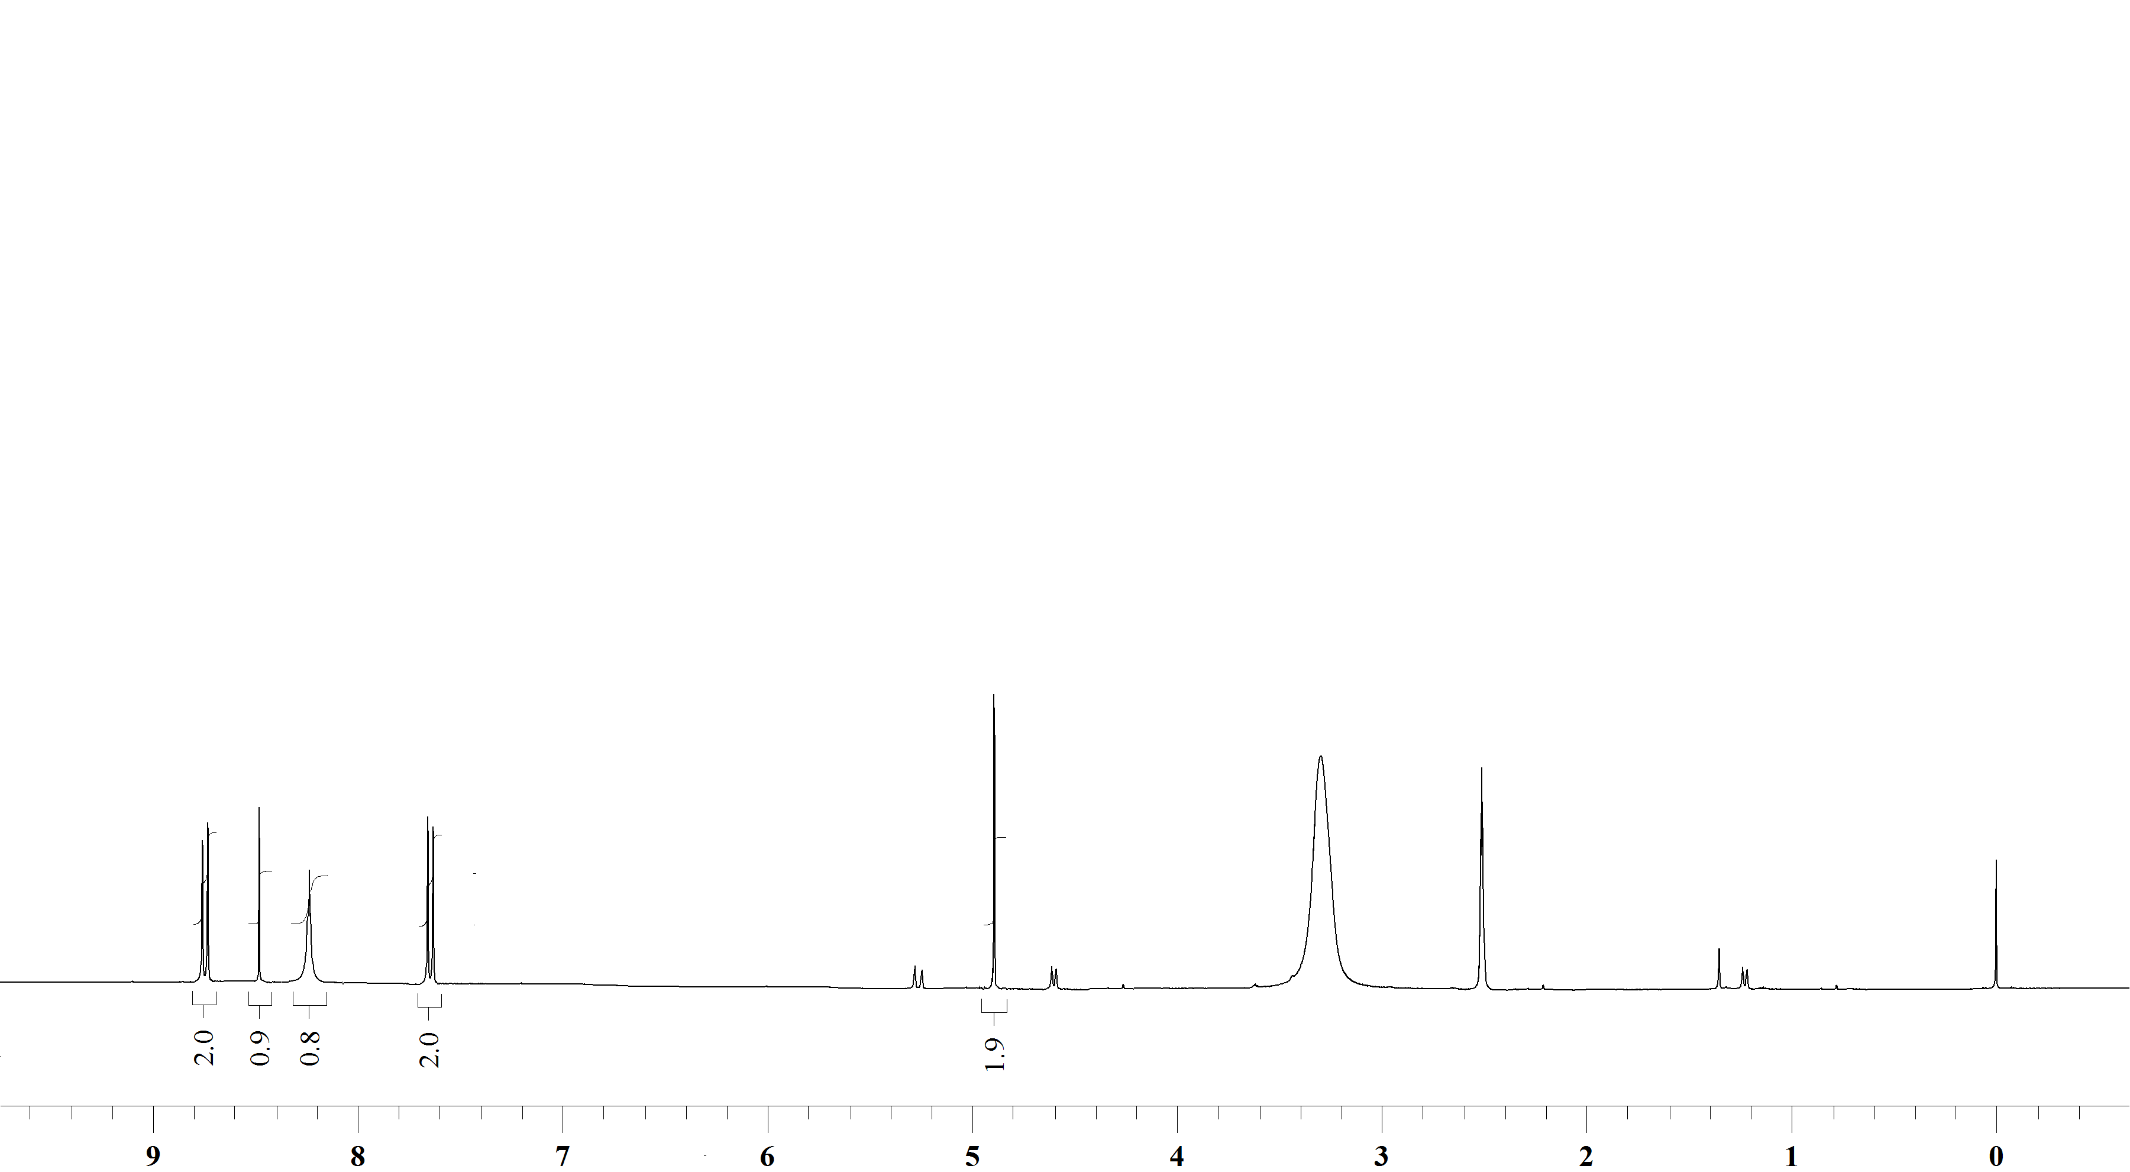


**1H NMR Spectrum of compound 25 in DMSO-*d6*(400 MHz)**


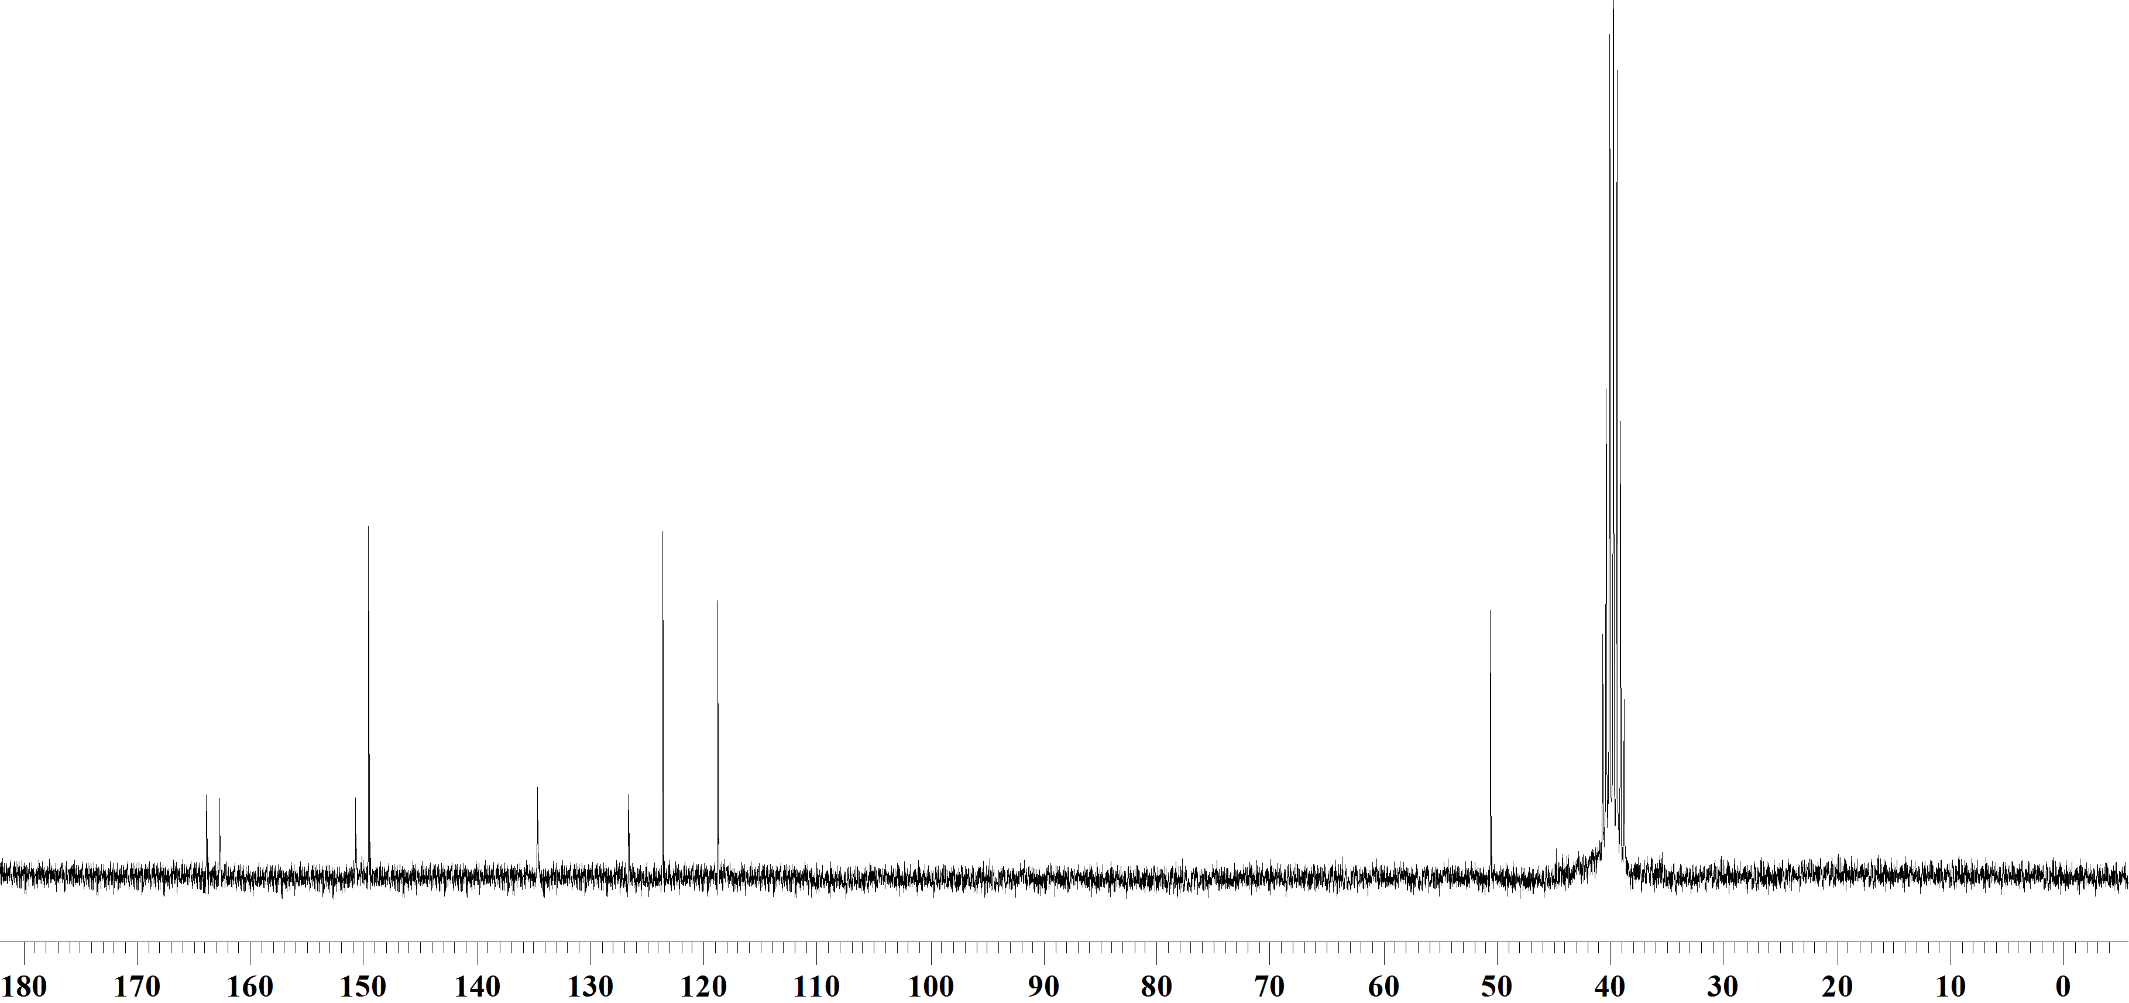


**13C NMR Spectrum of compound 25 in DMSO-*d6*(100 MHz)**


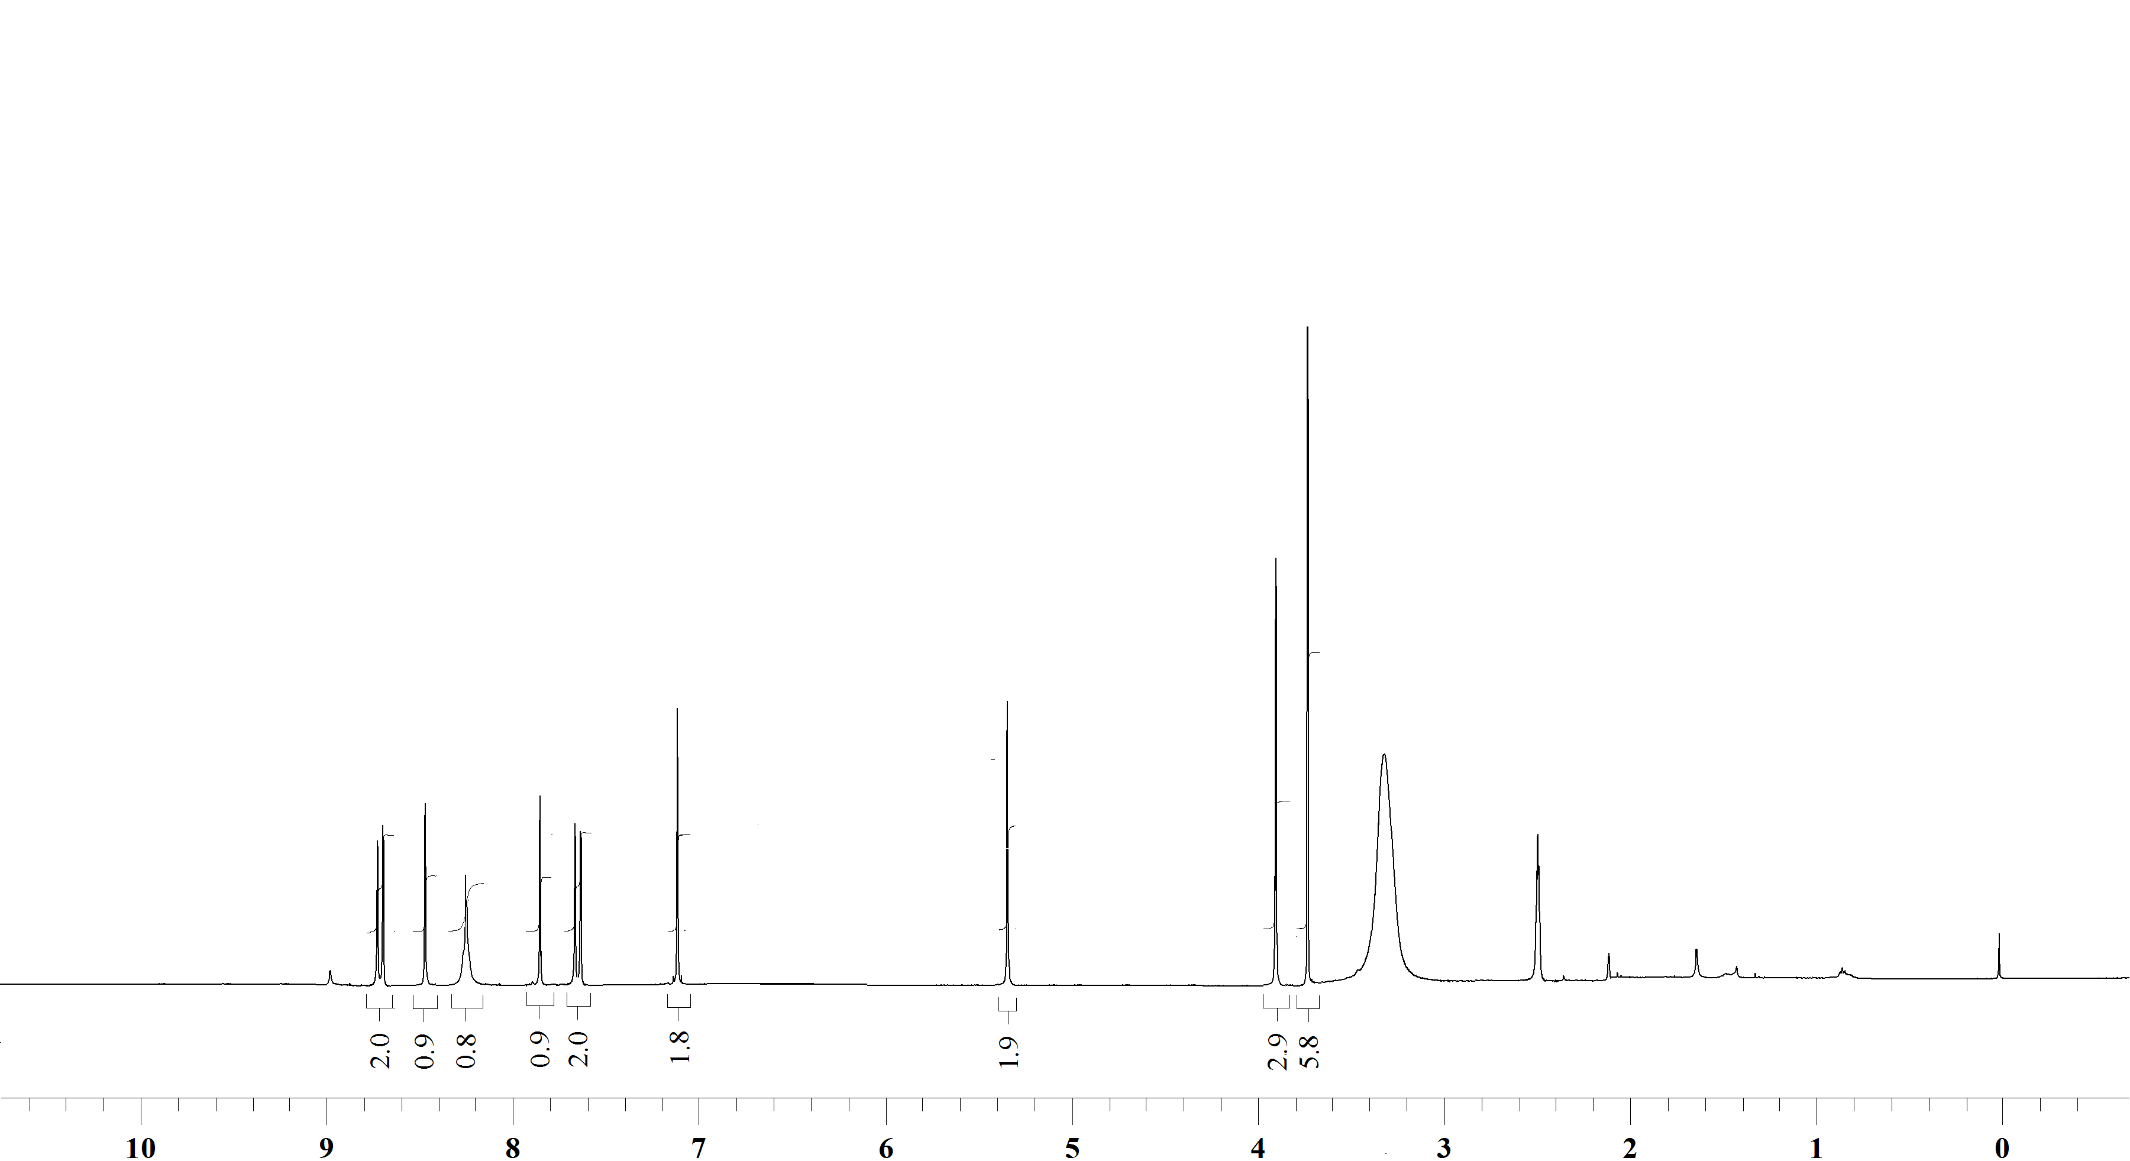


**1H NMR Spectrum of compound 27a in DMSO-*d6*(400 MHz)**


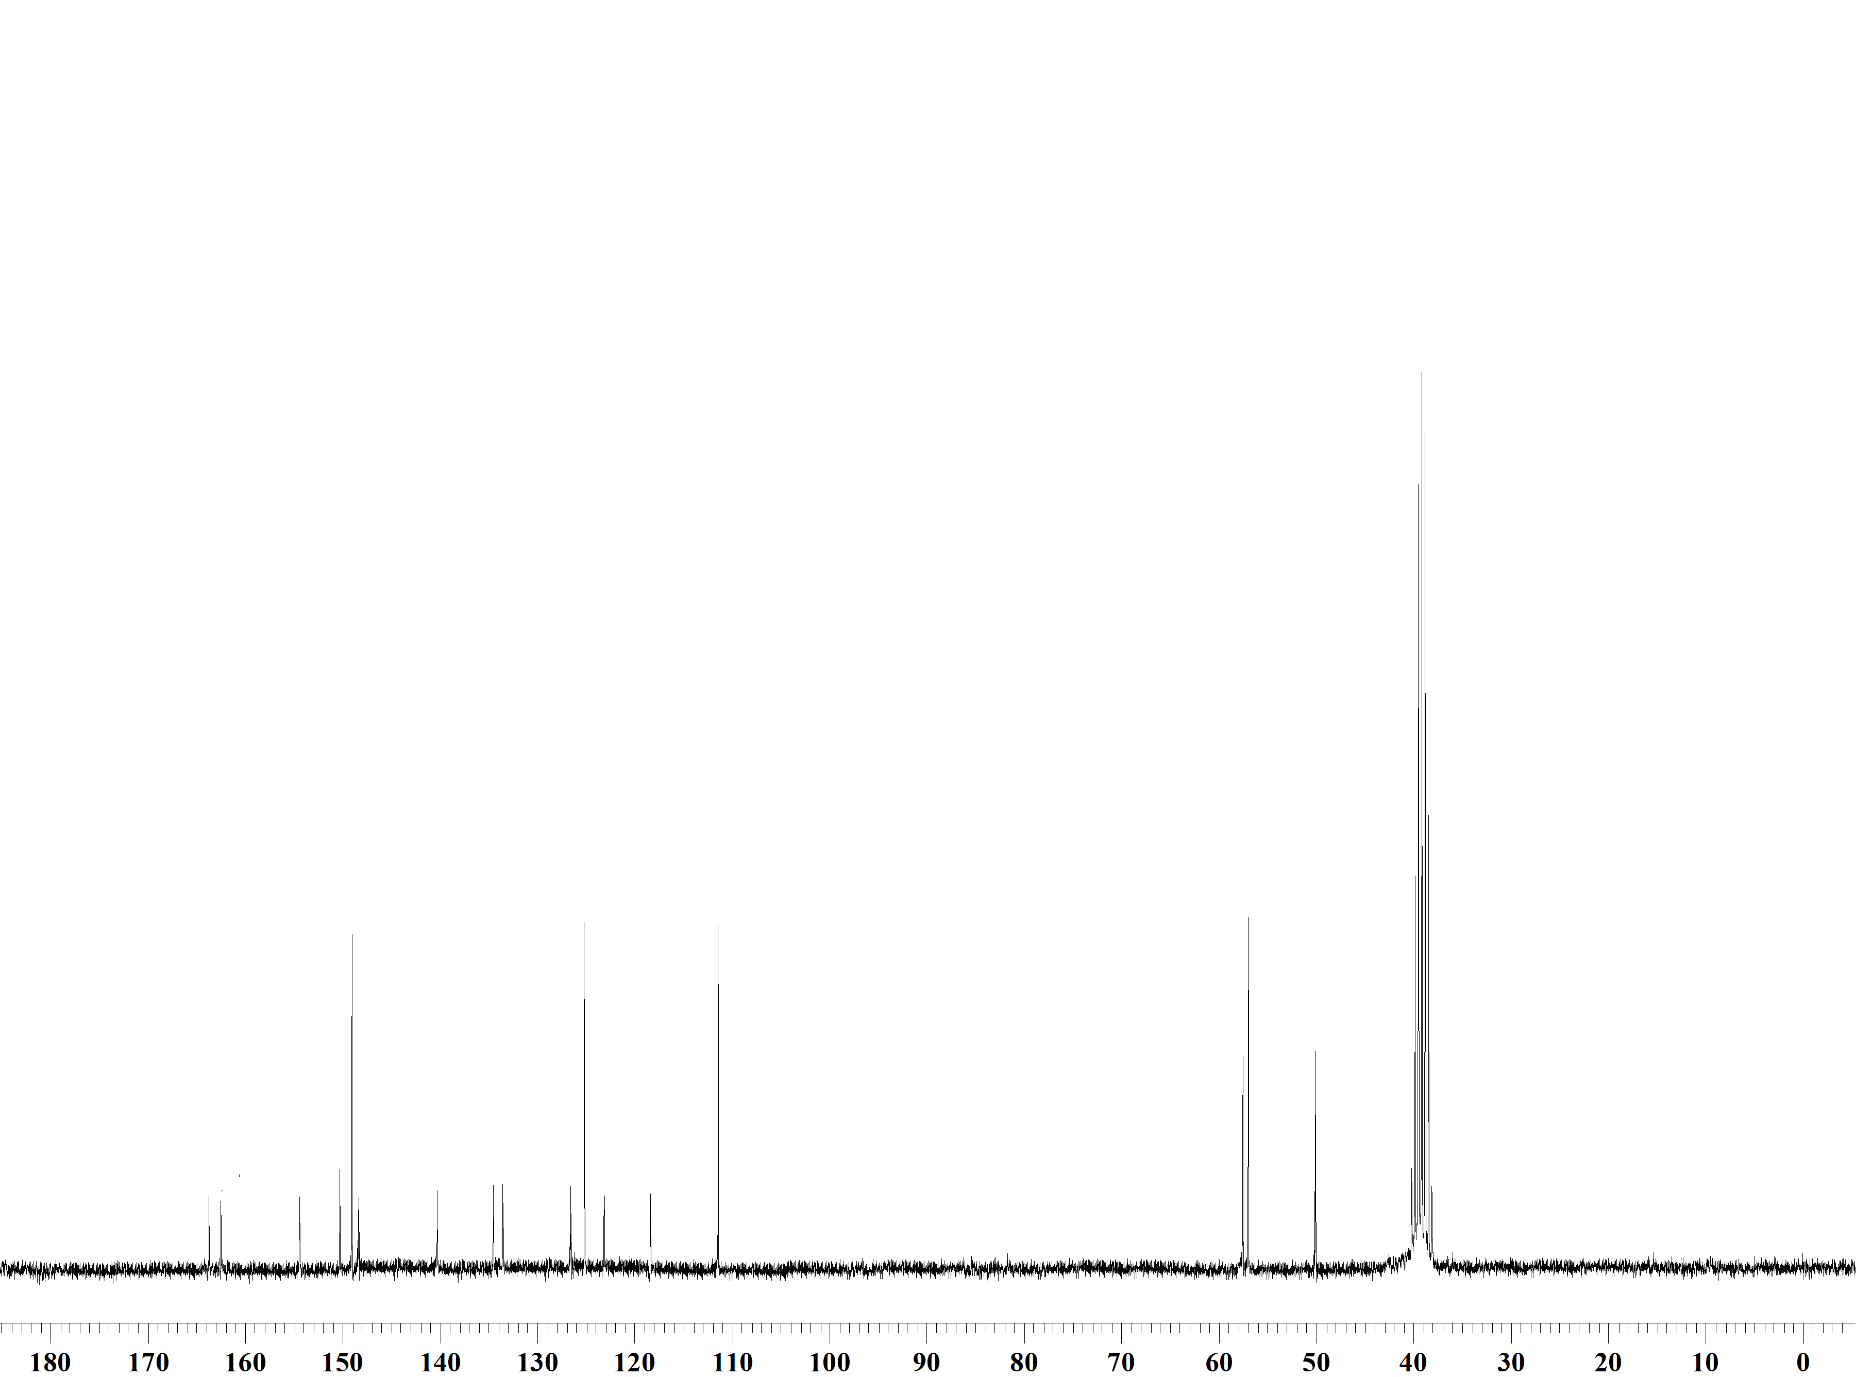


**13C NMR Spectrum of compound 27a in DMSO-*d6*(100 MHz)**


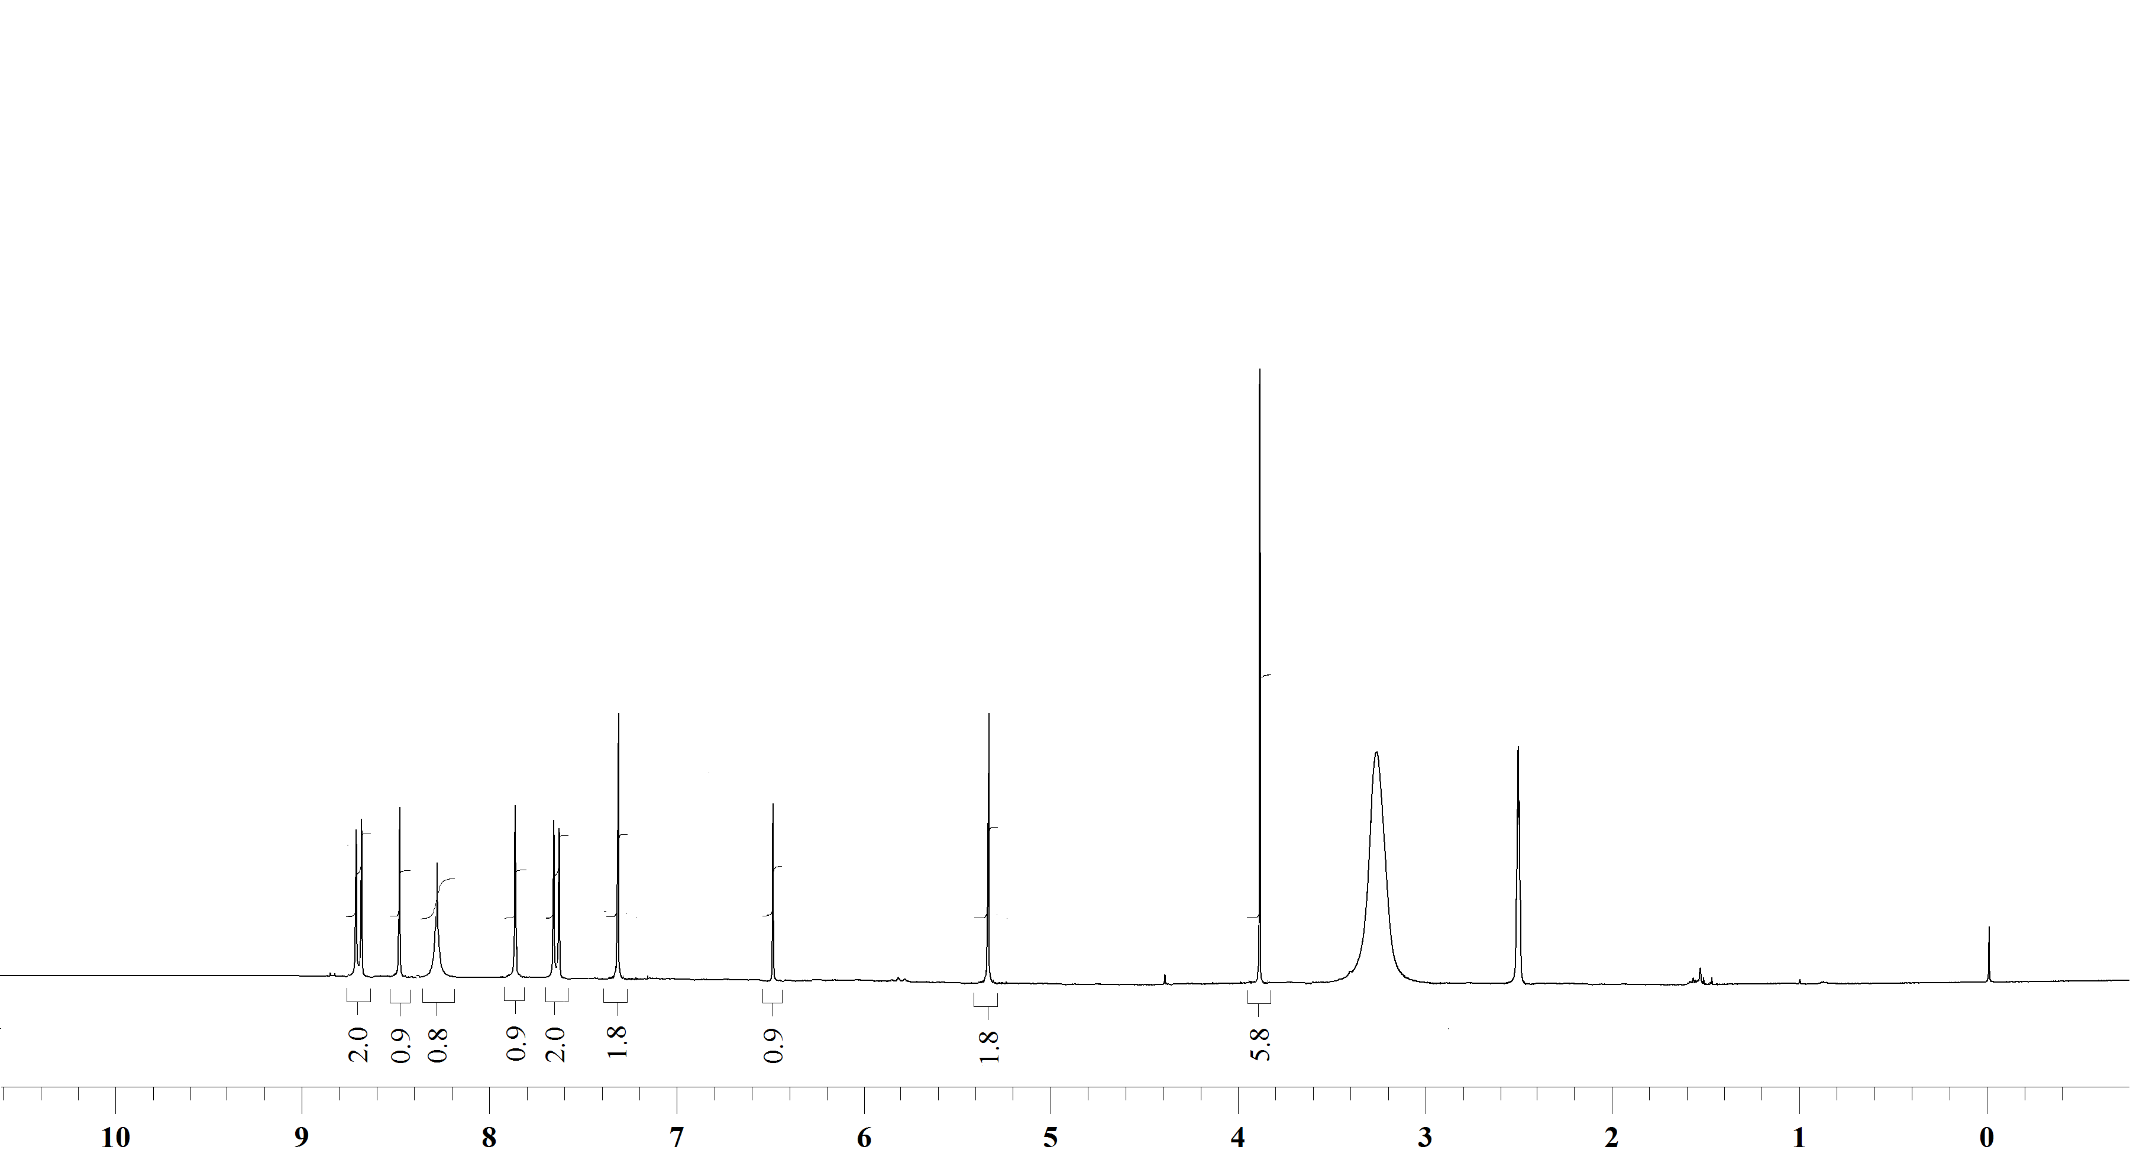


**1H NMR Spectrum of compound 27b in DMSO-*d6*(400 MHz)**


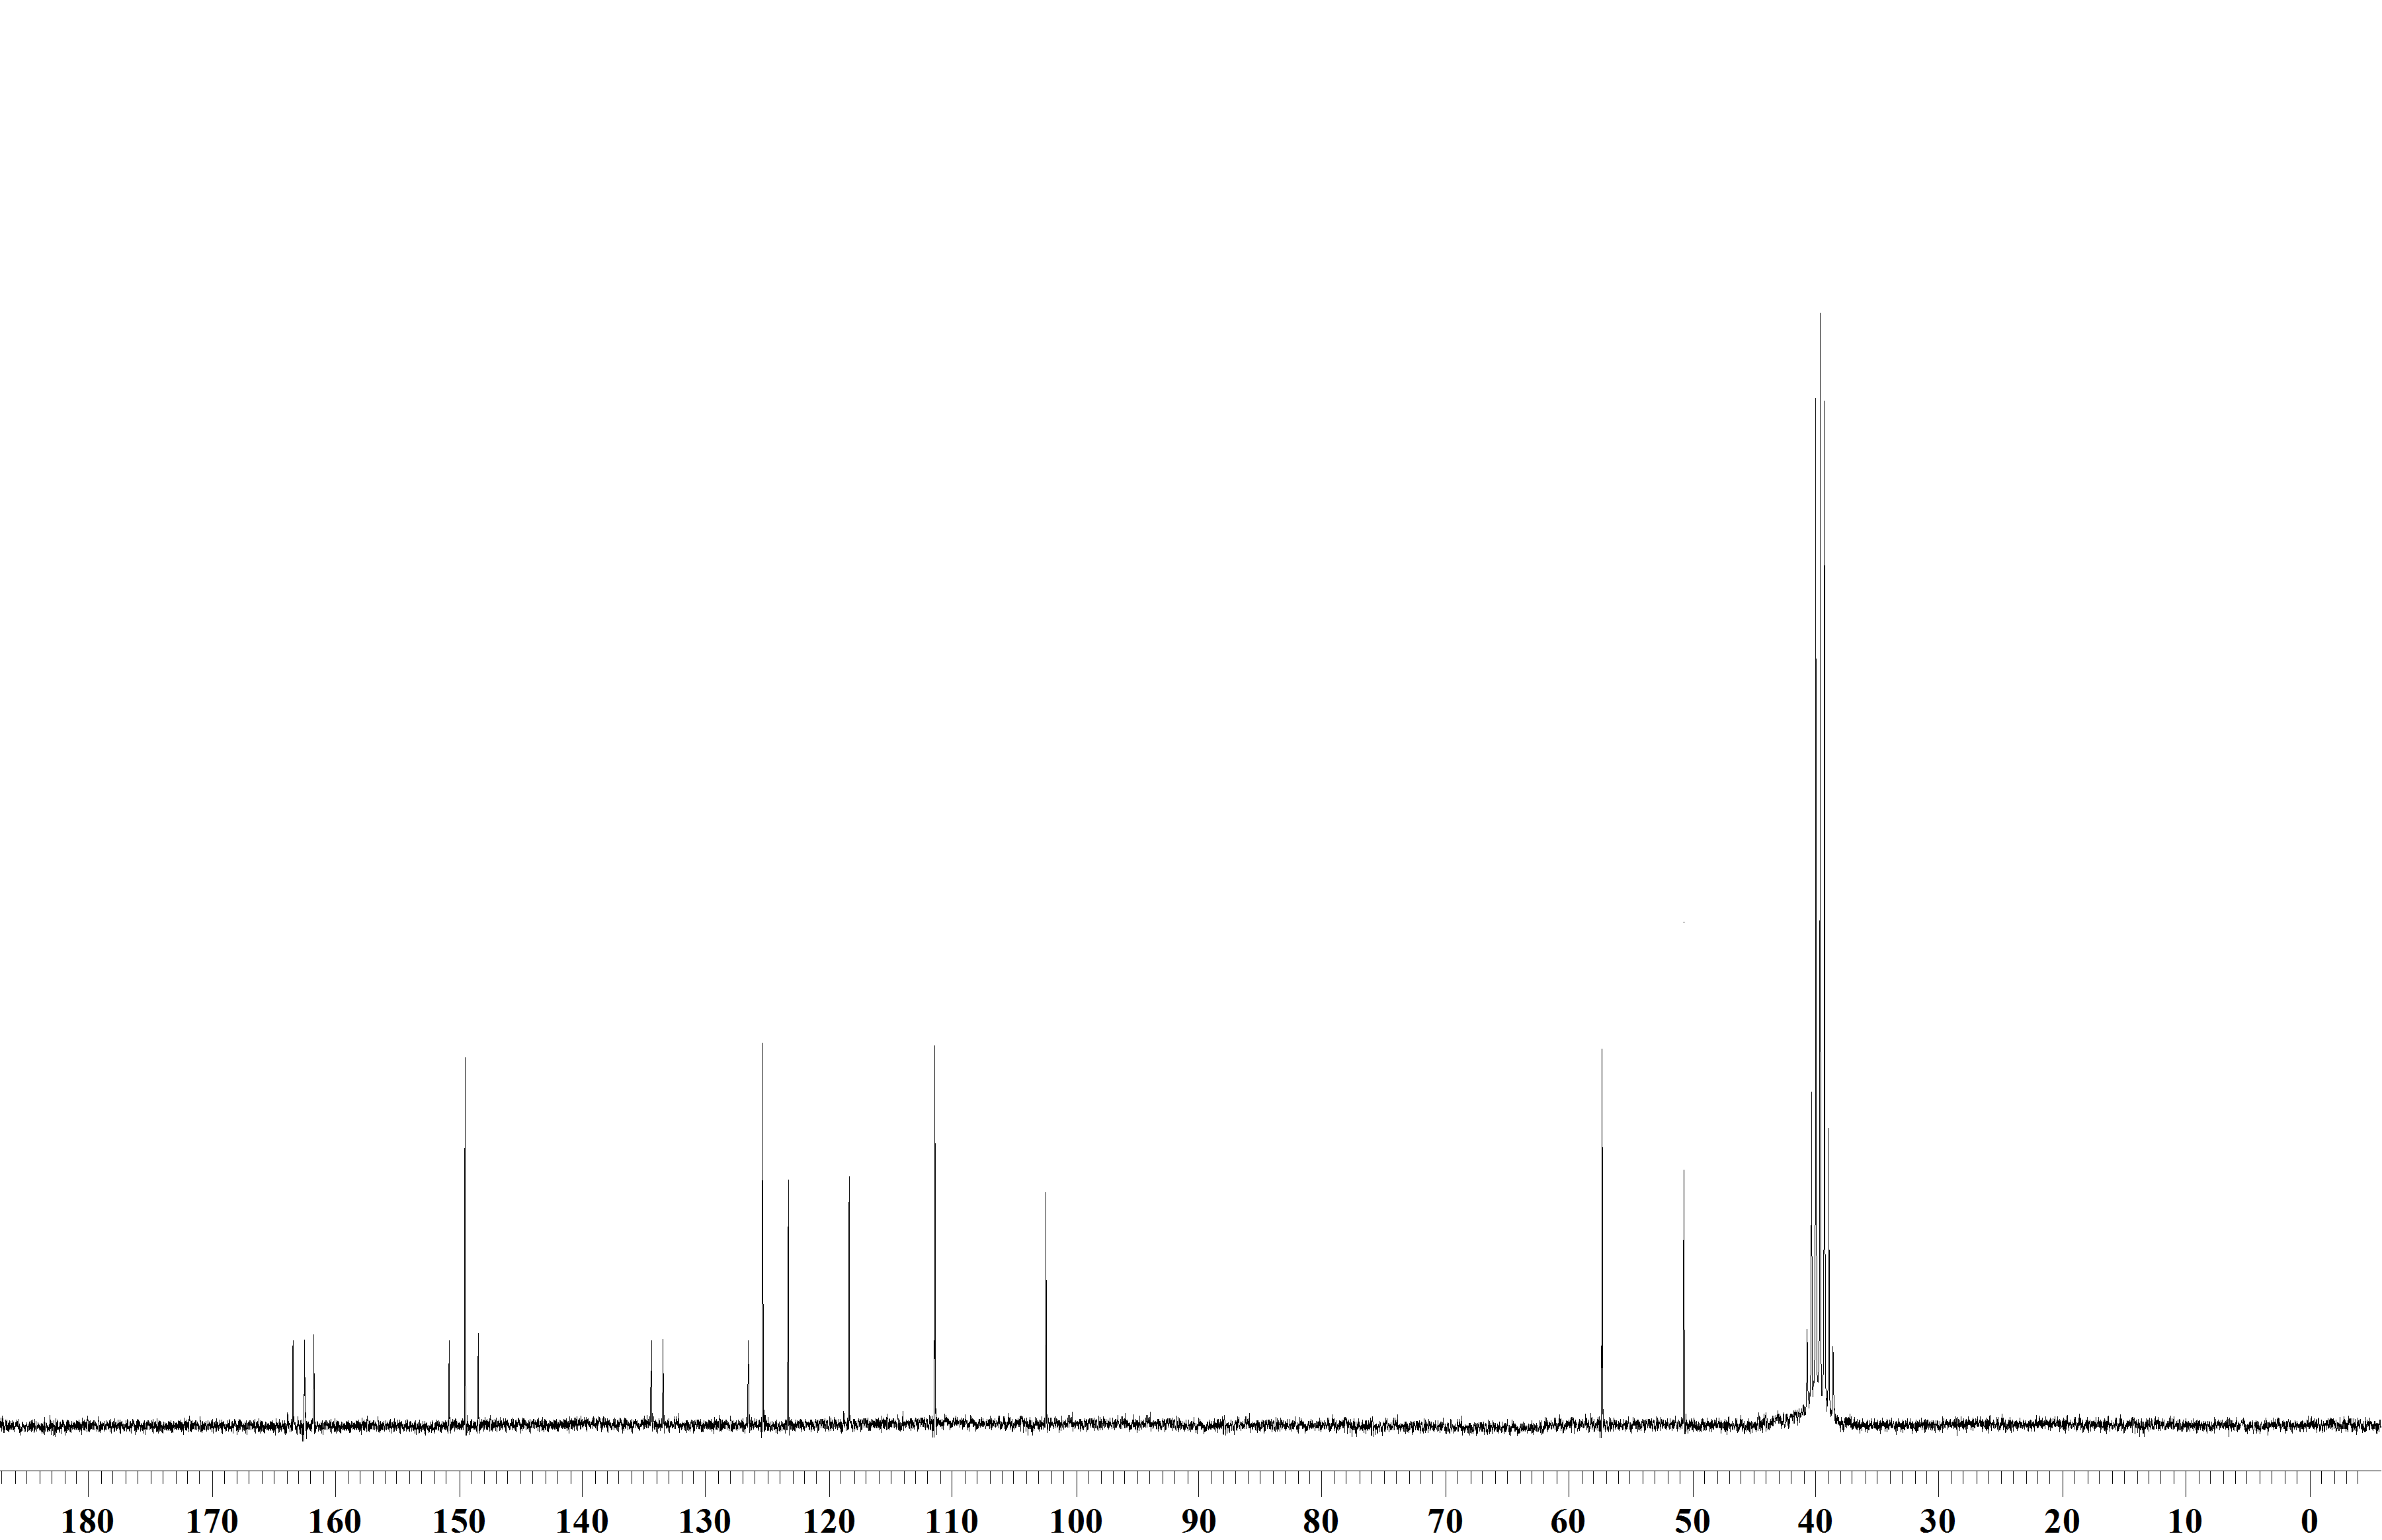


**13C NMR Spectrum of compound 27b in DMSO-*d6*(100 MHz)**


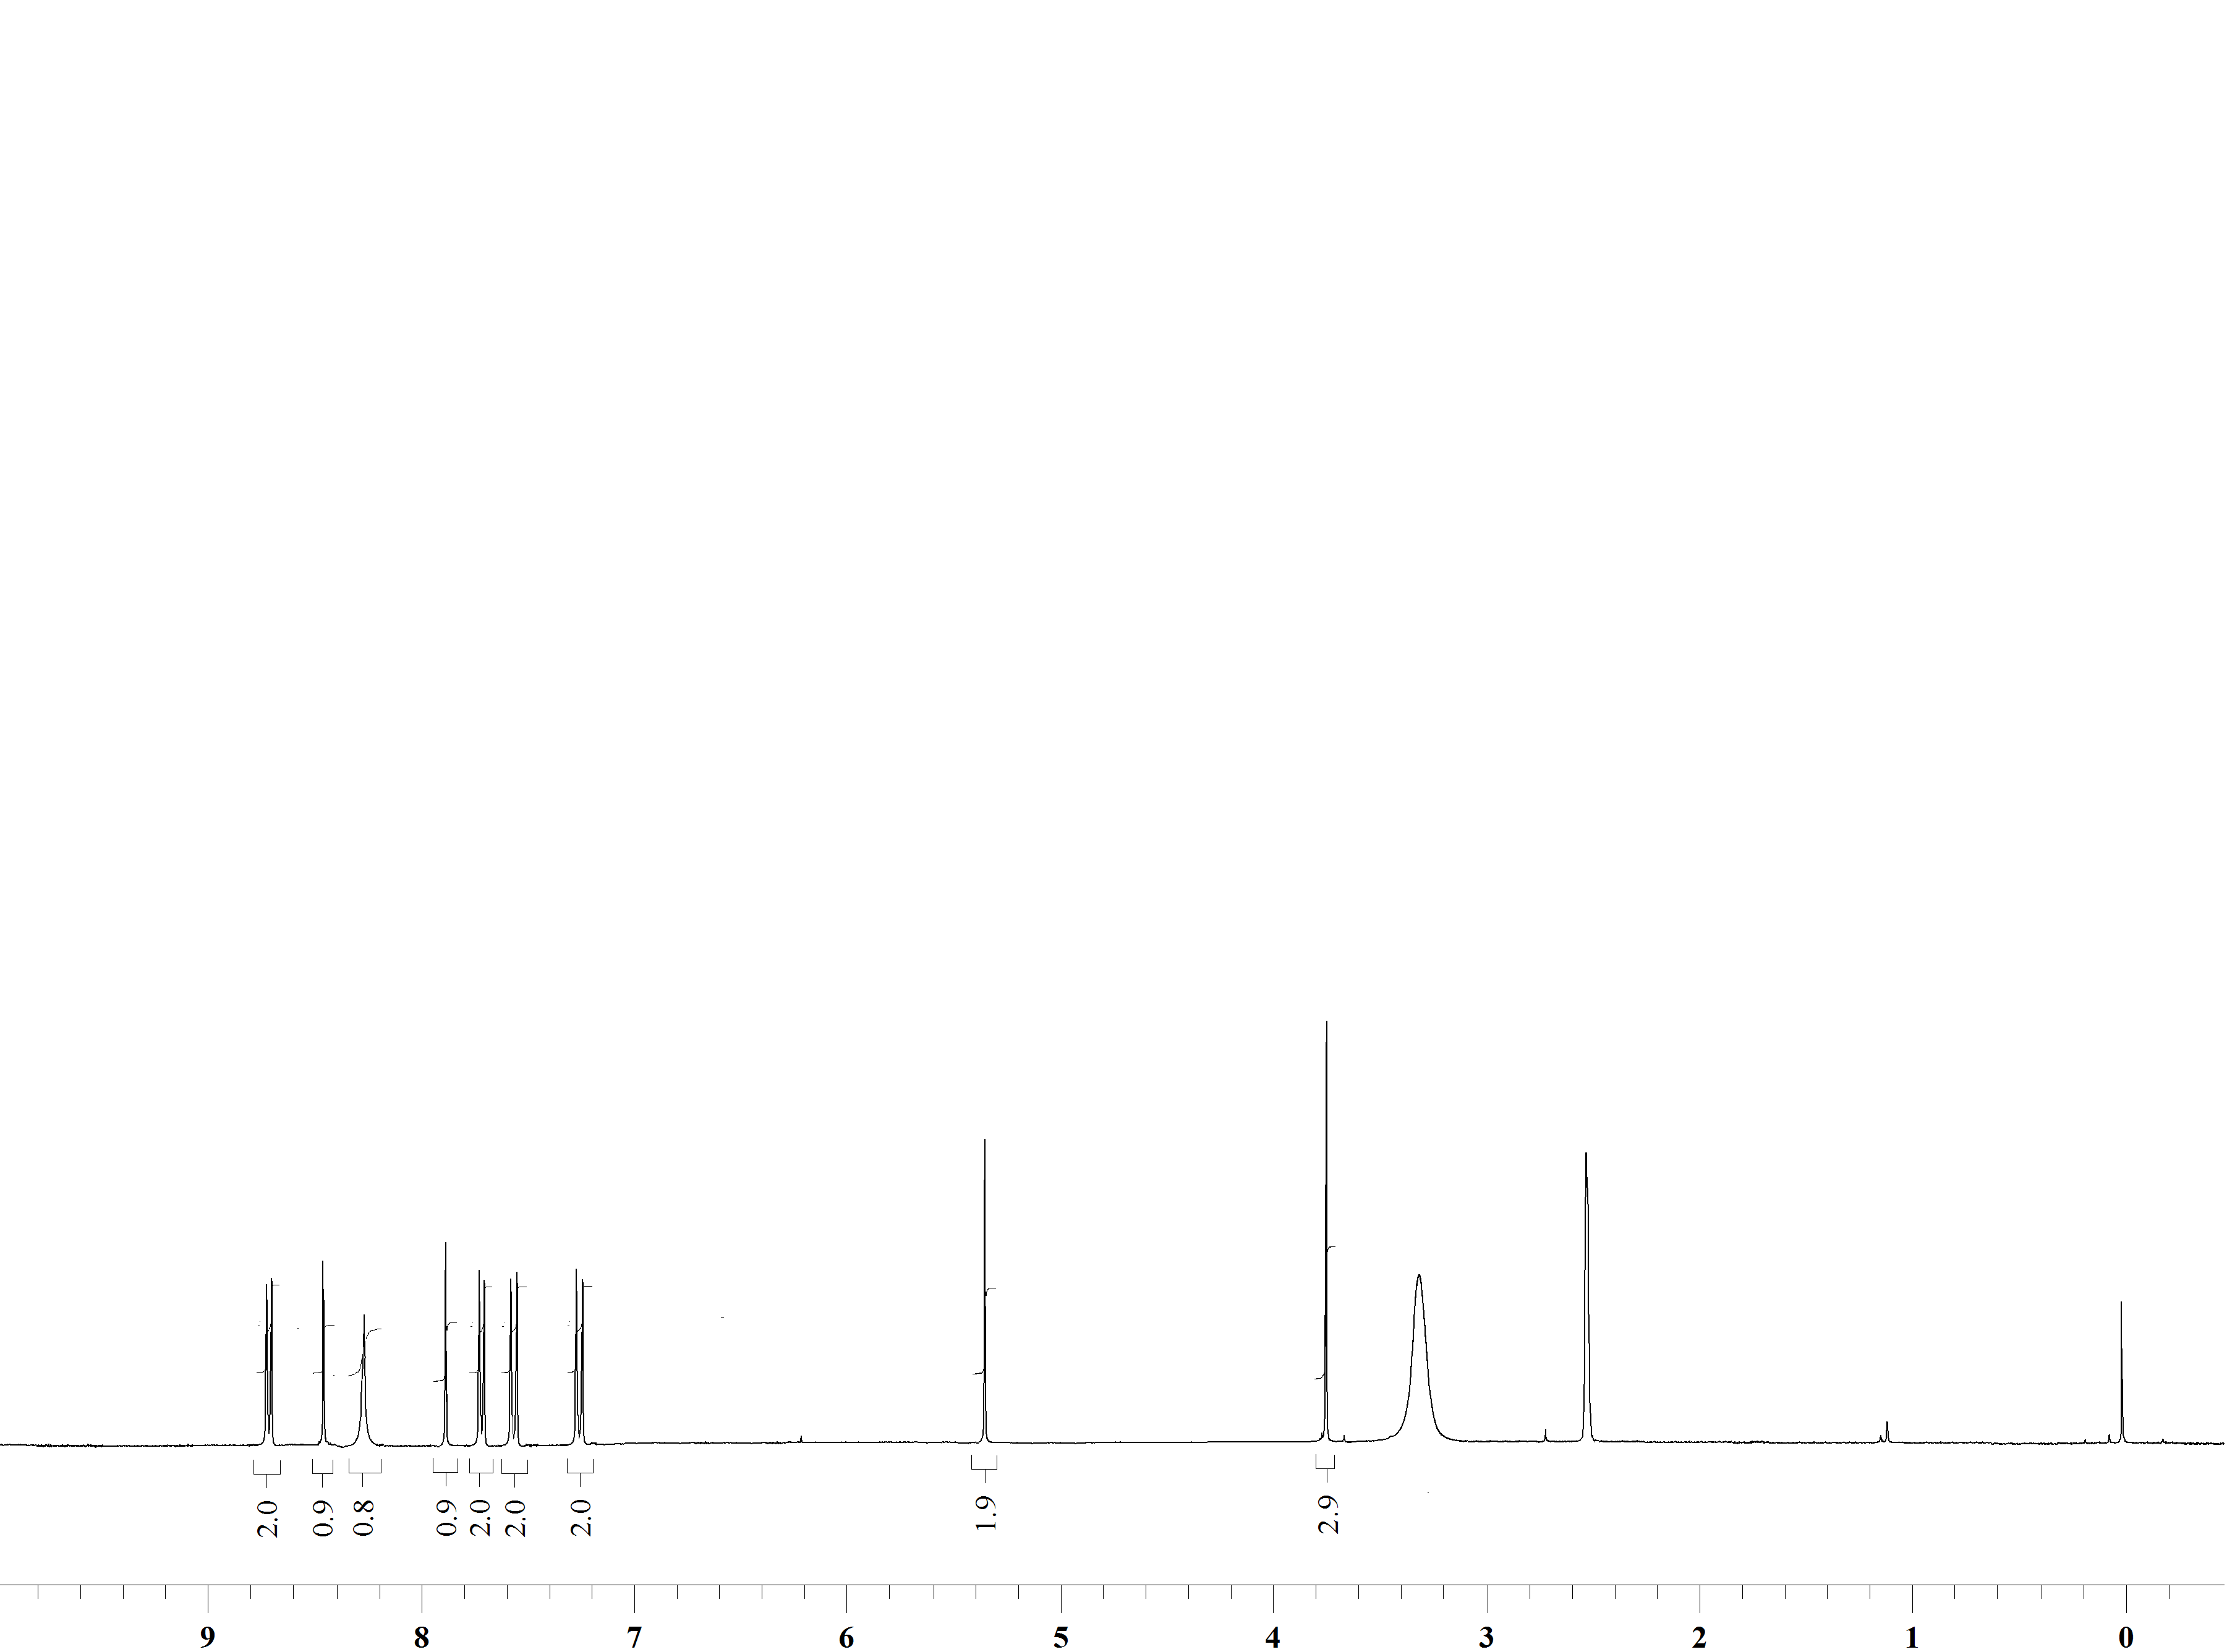


**1H NMR Spectrum of compound 27c in DMSO-*d6*(400 MHz)**


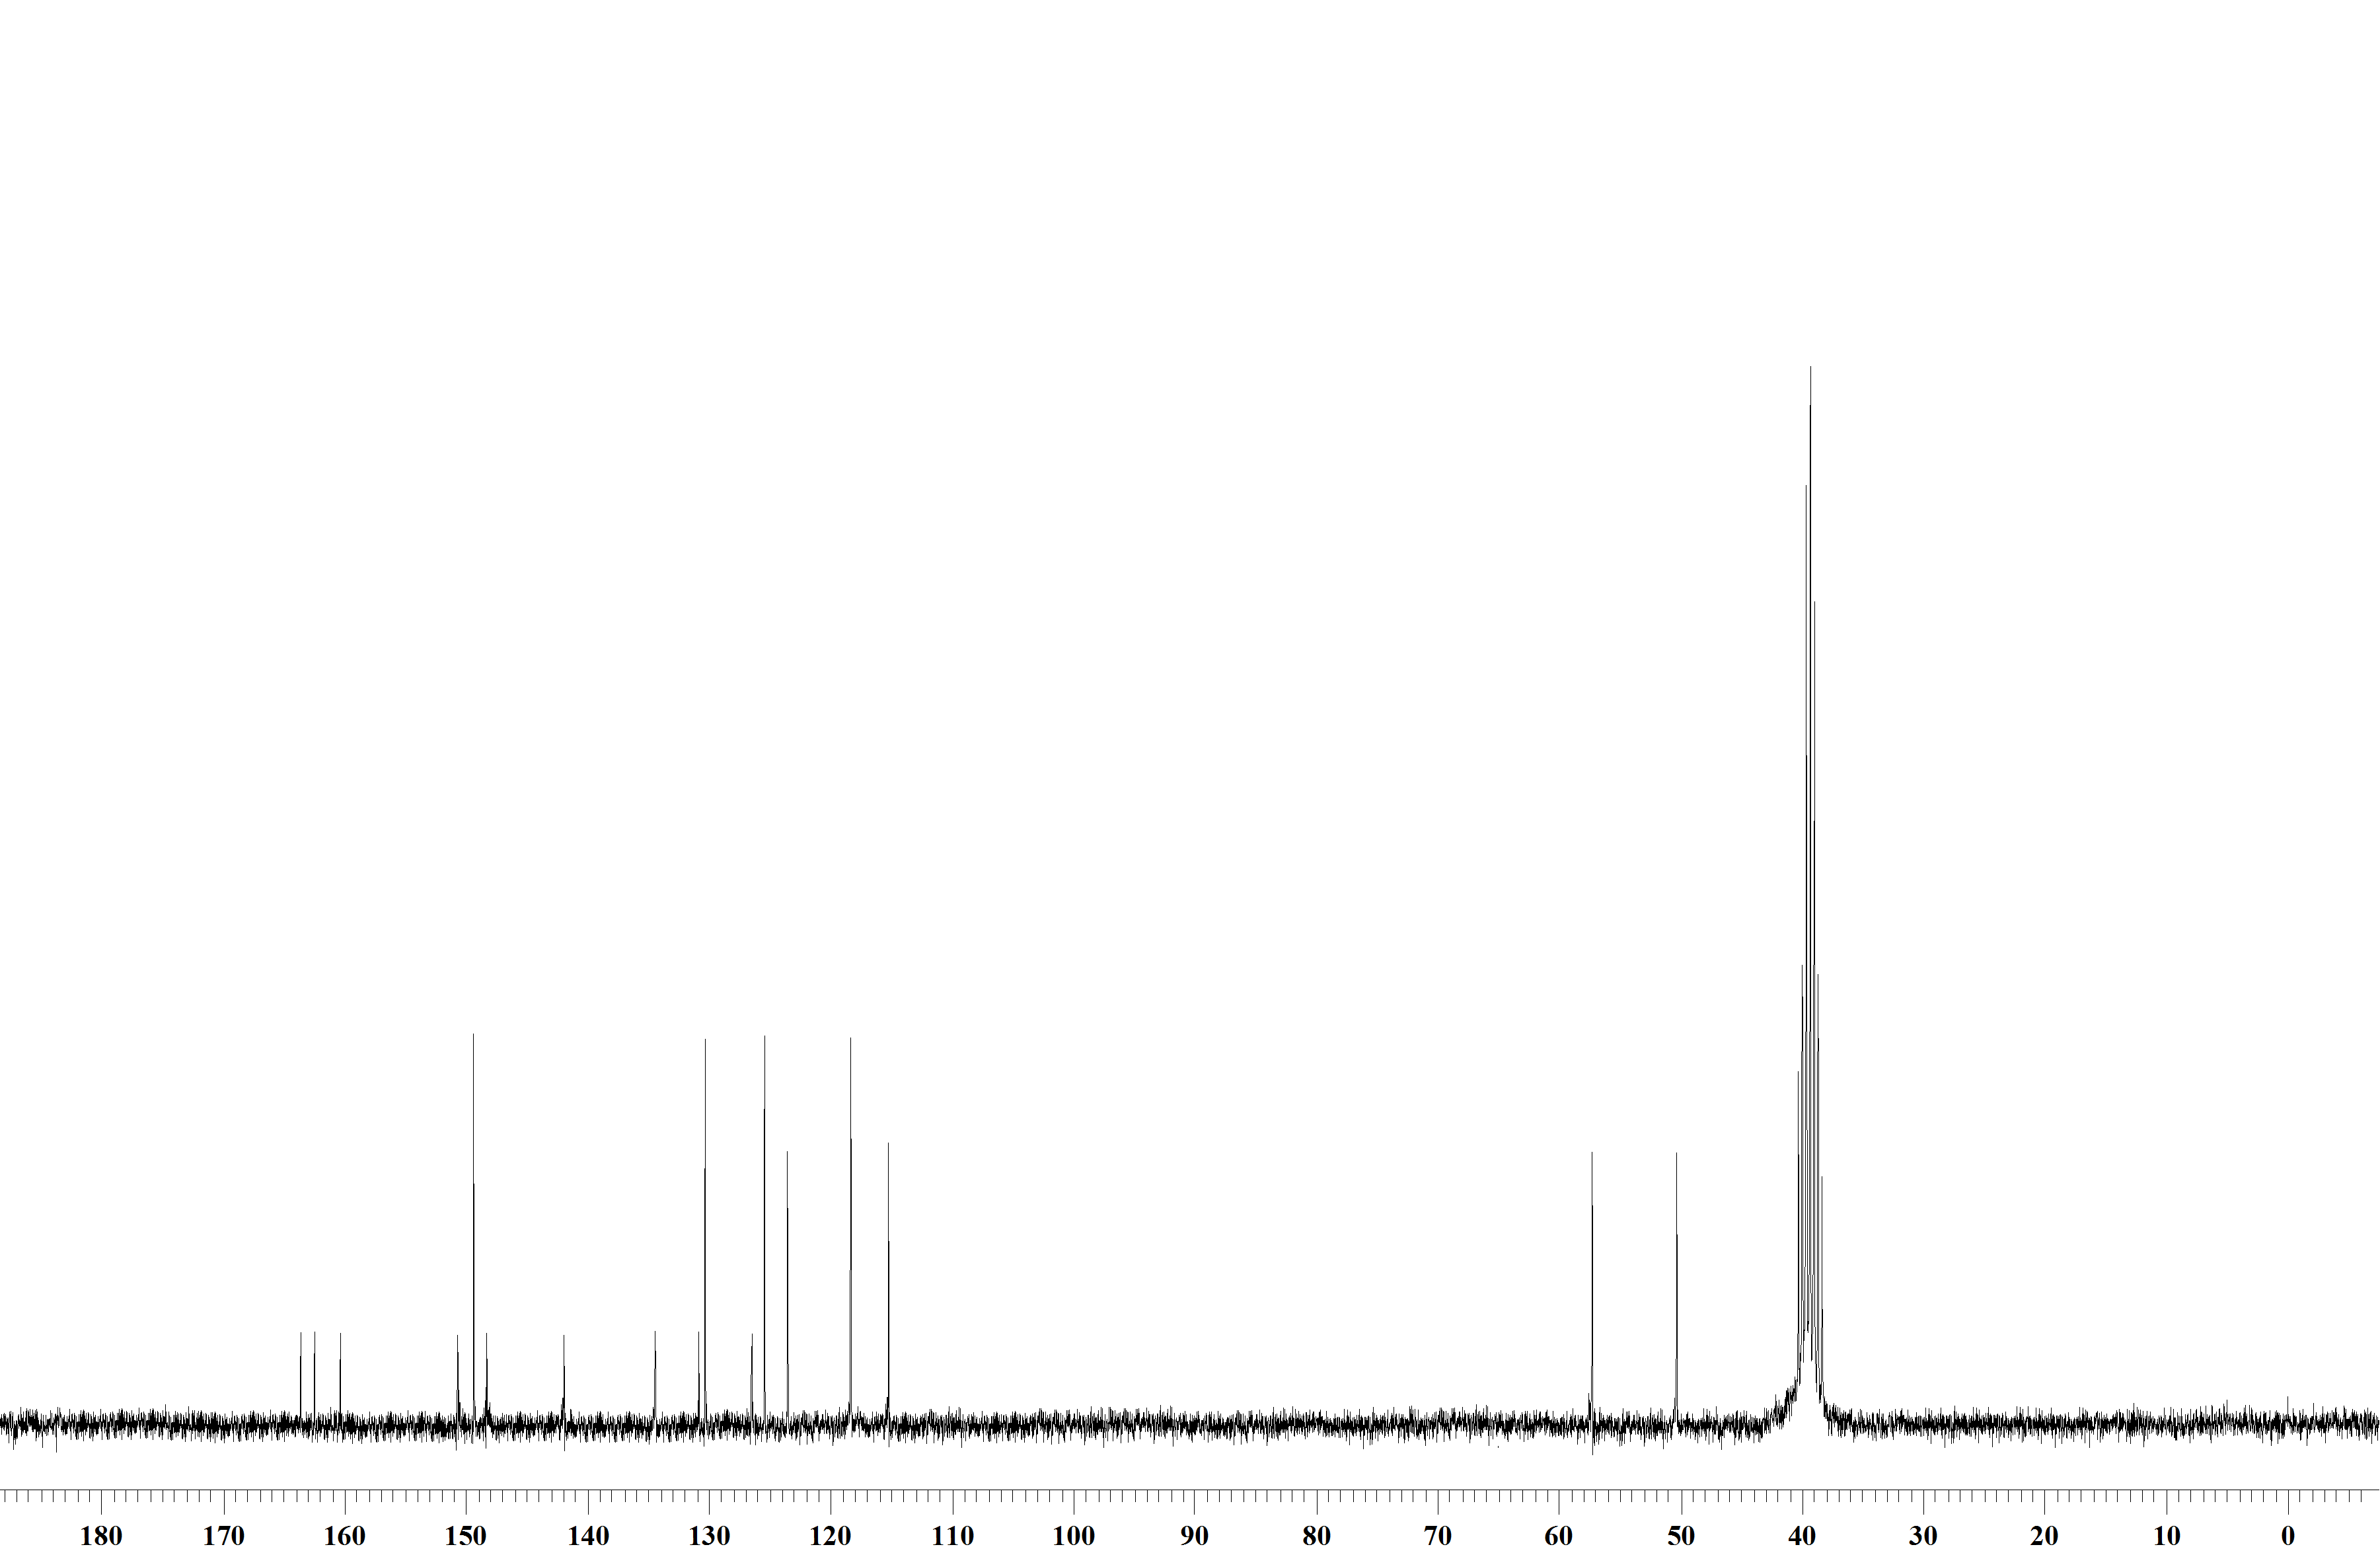


**13C NMR Spectrum of compound 27c in DMSO-*d6*(100 MHz)**


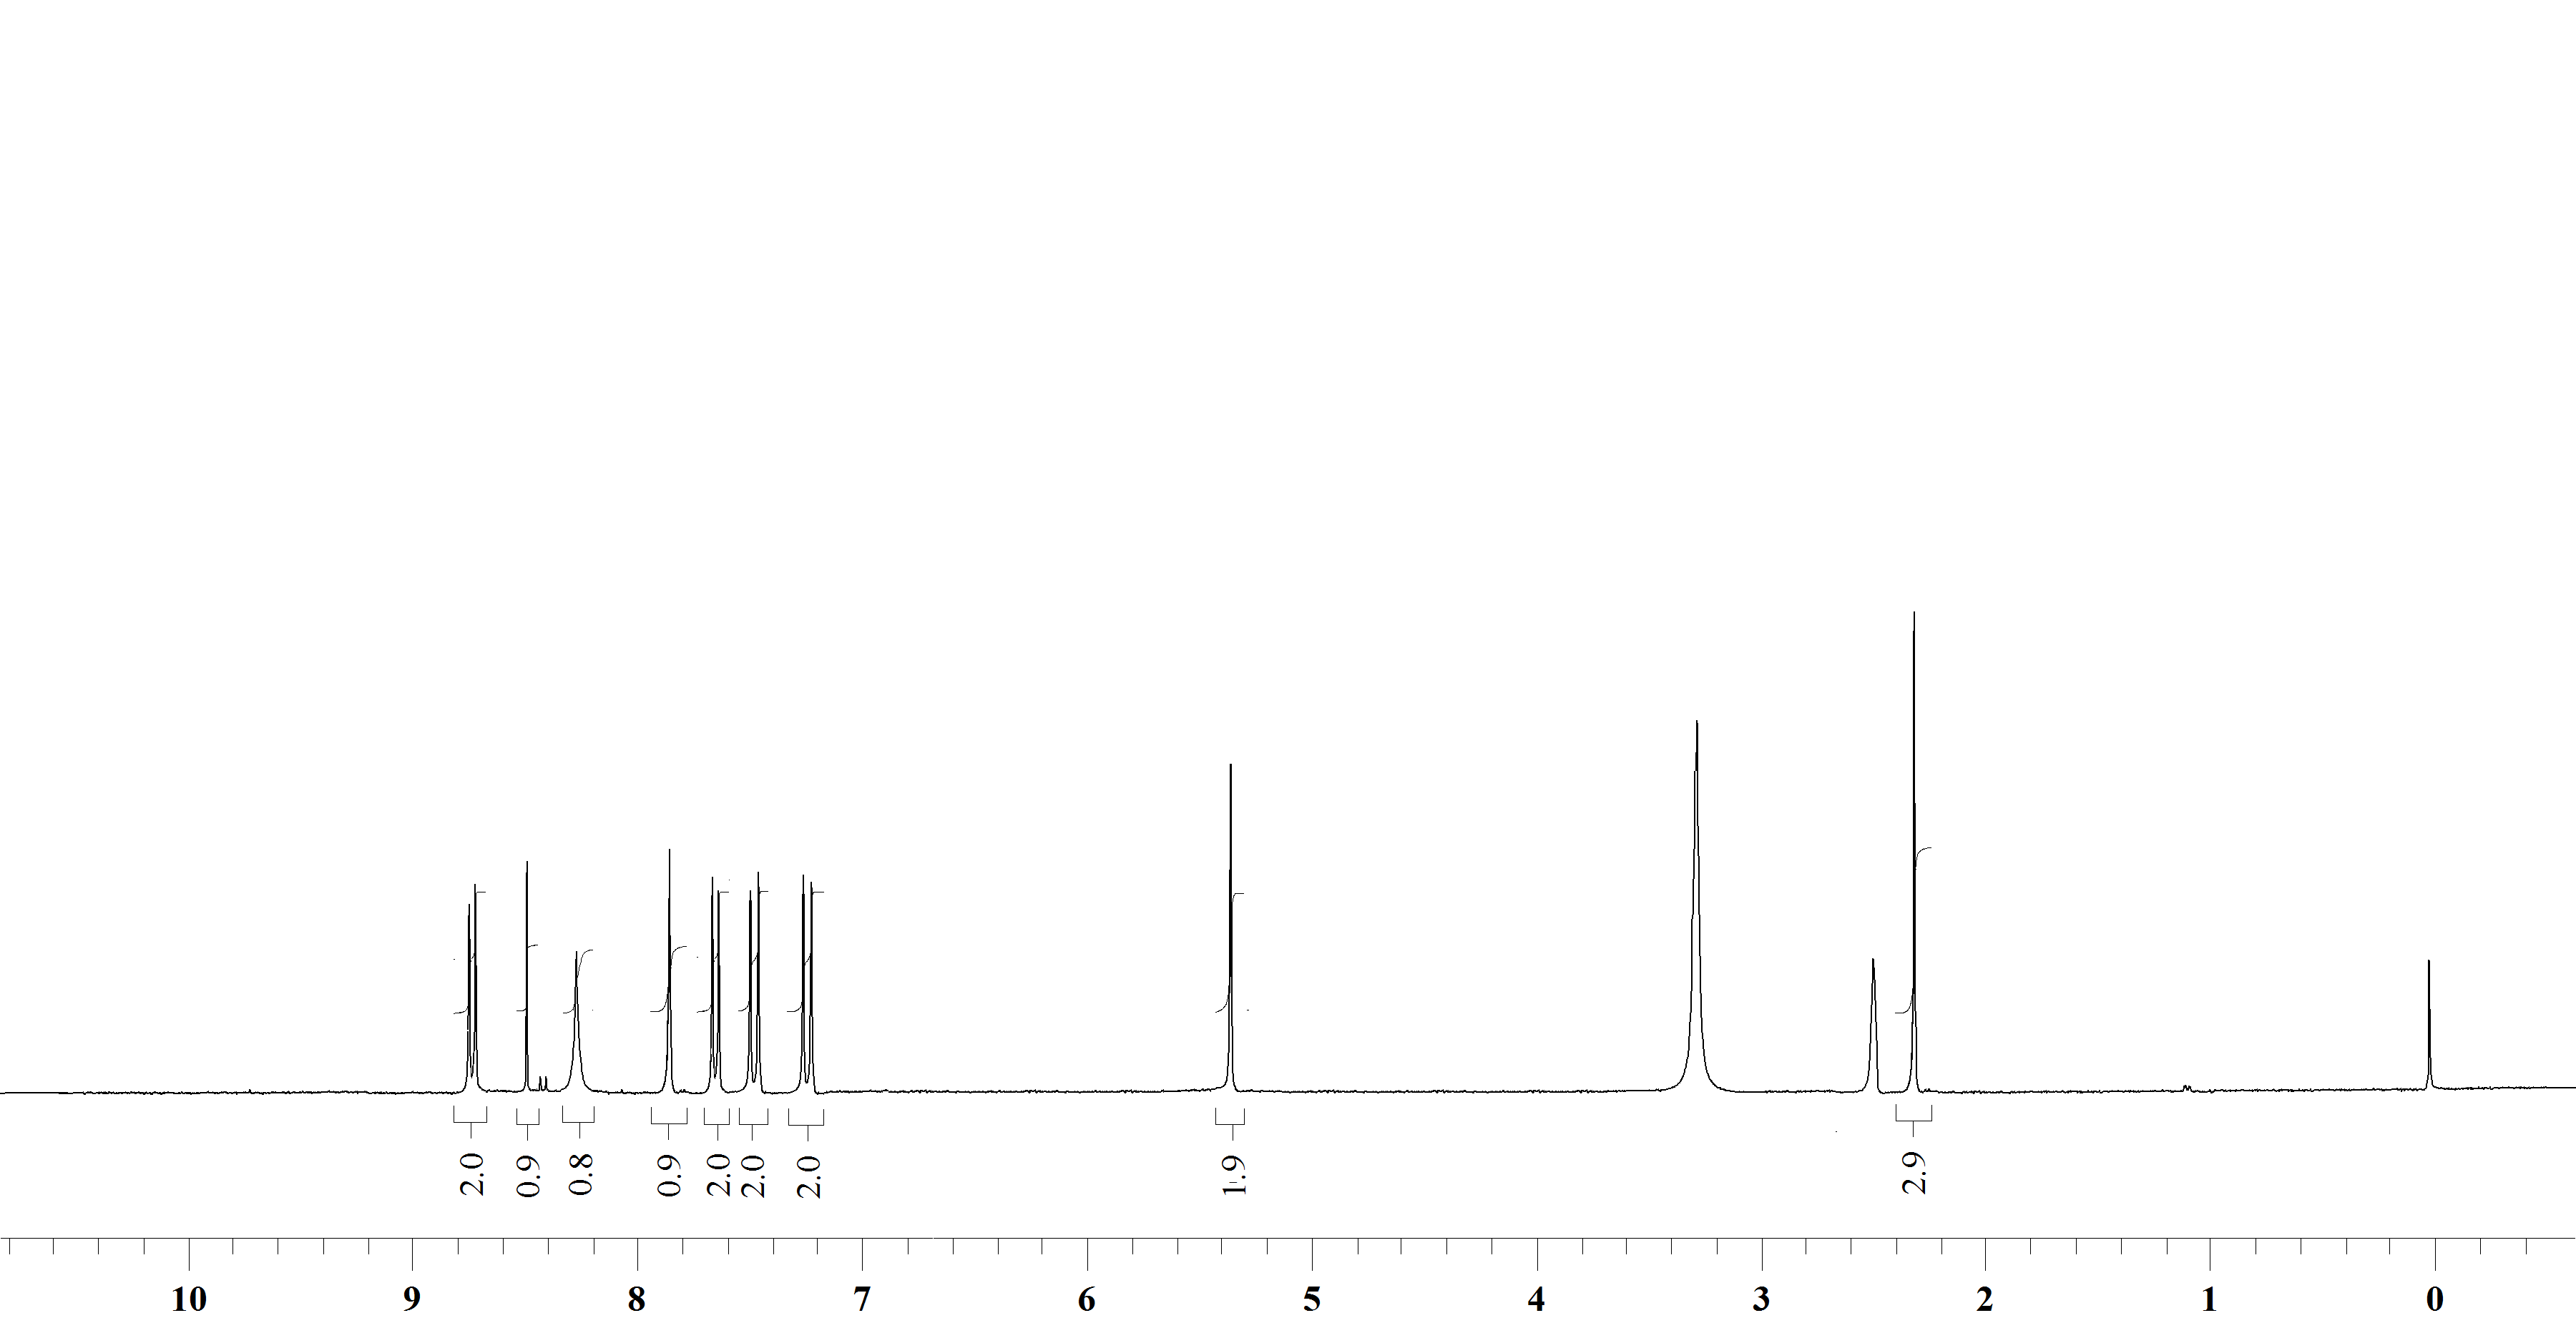


**1H NMR Spectrum of compound 27d in DMSO-*d6*(400 MHz)**


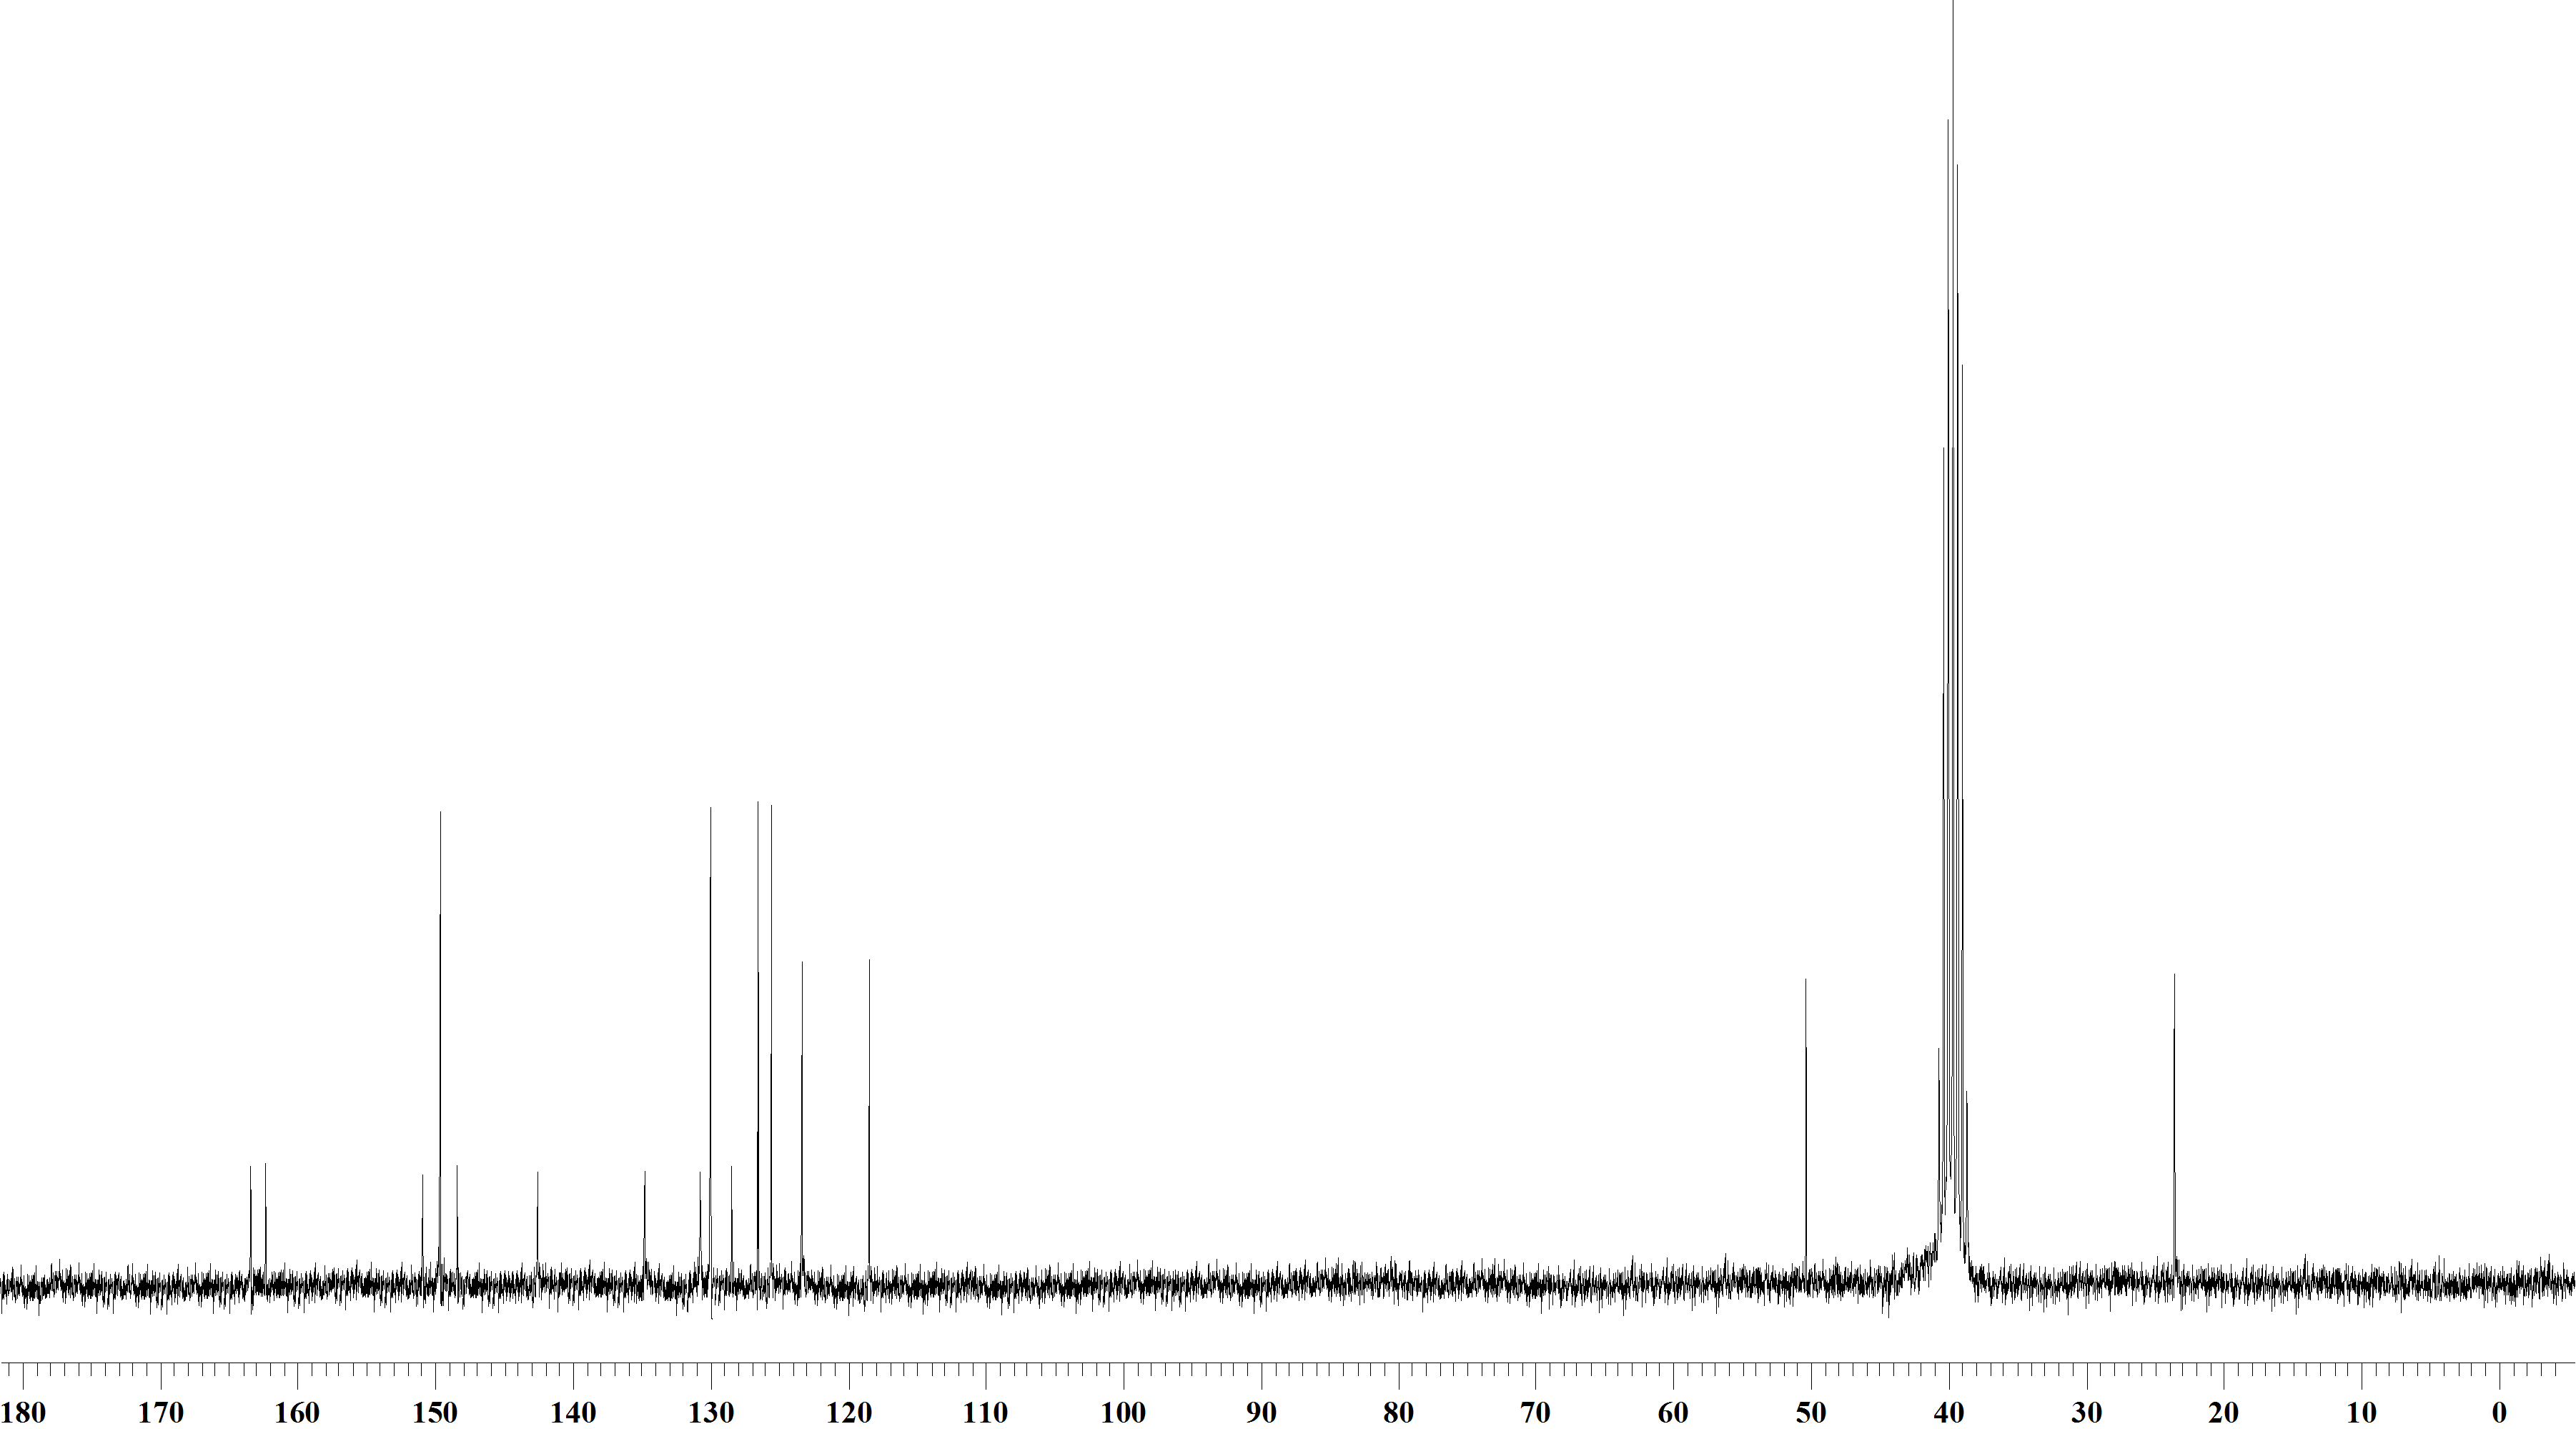


**13C NMR Spectrum of compound 27d in DMSO-*d6*(100 MHz)**


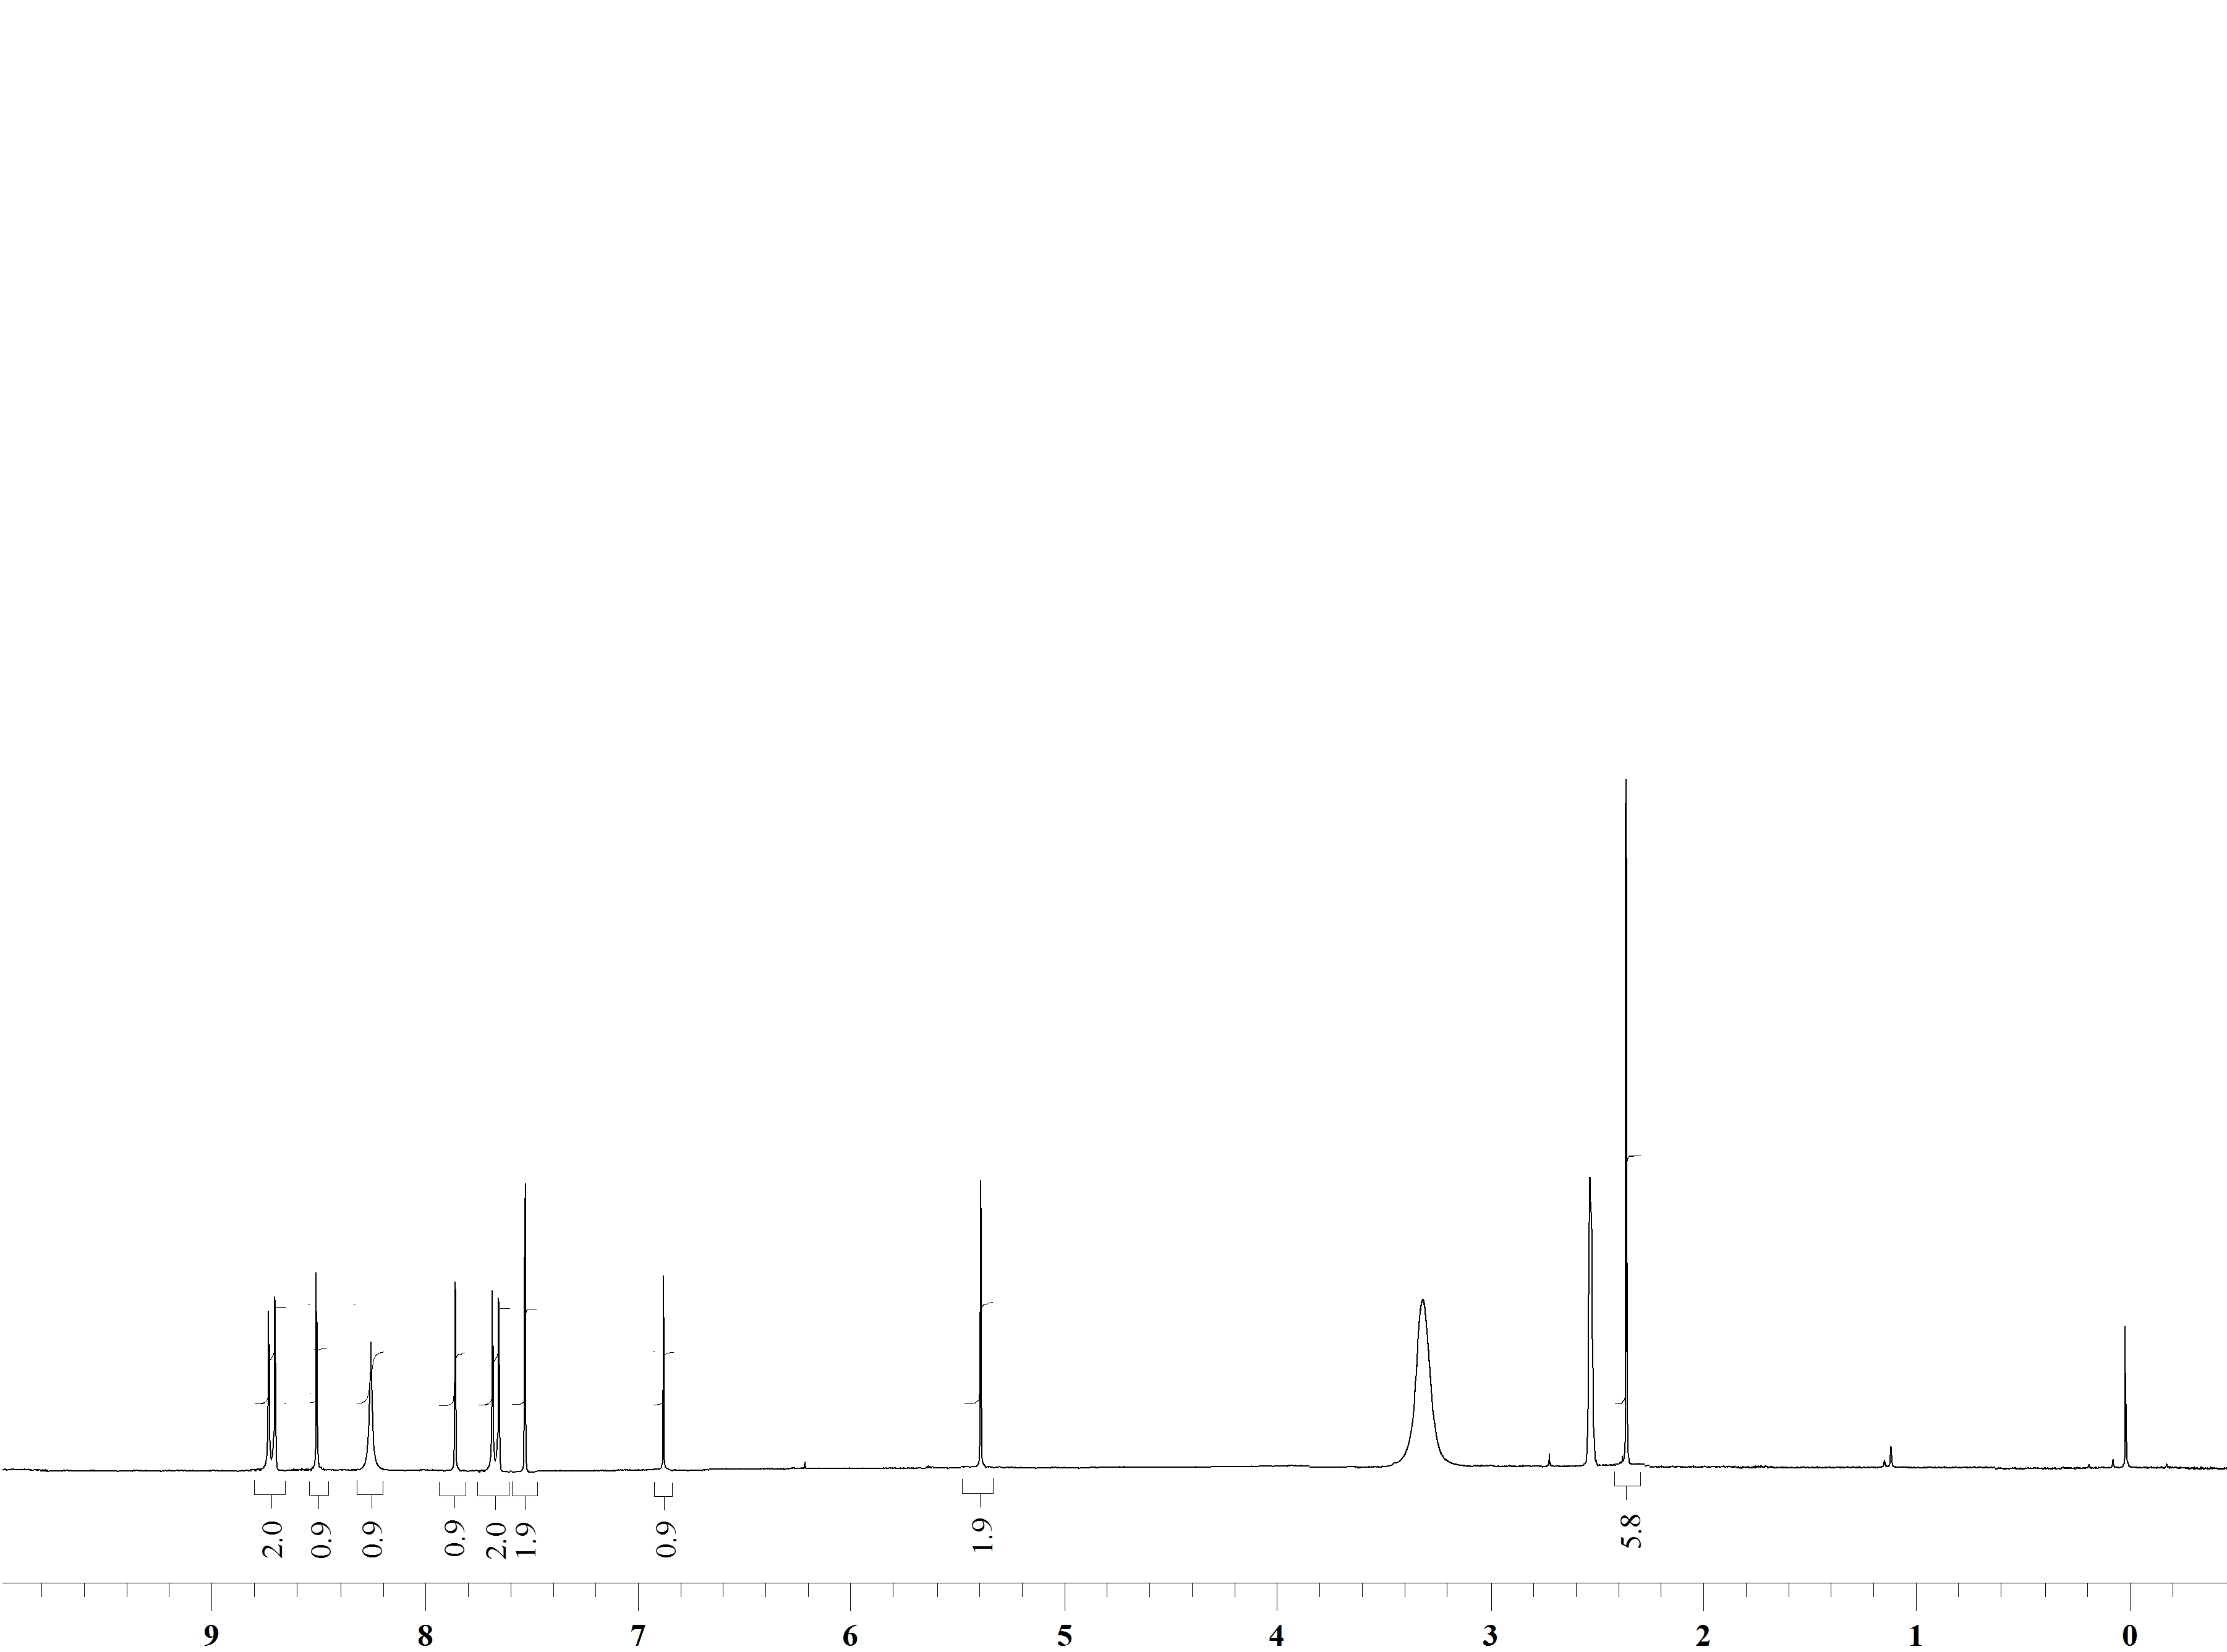


**1H NMR Spectrum of compound 27e in DMSO-*d6*(400 MHz)**


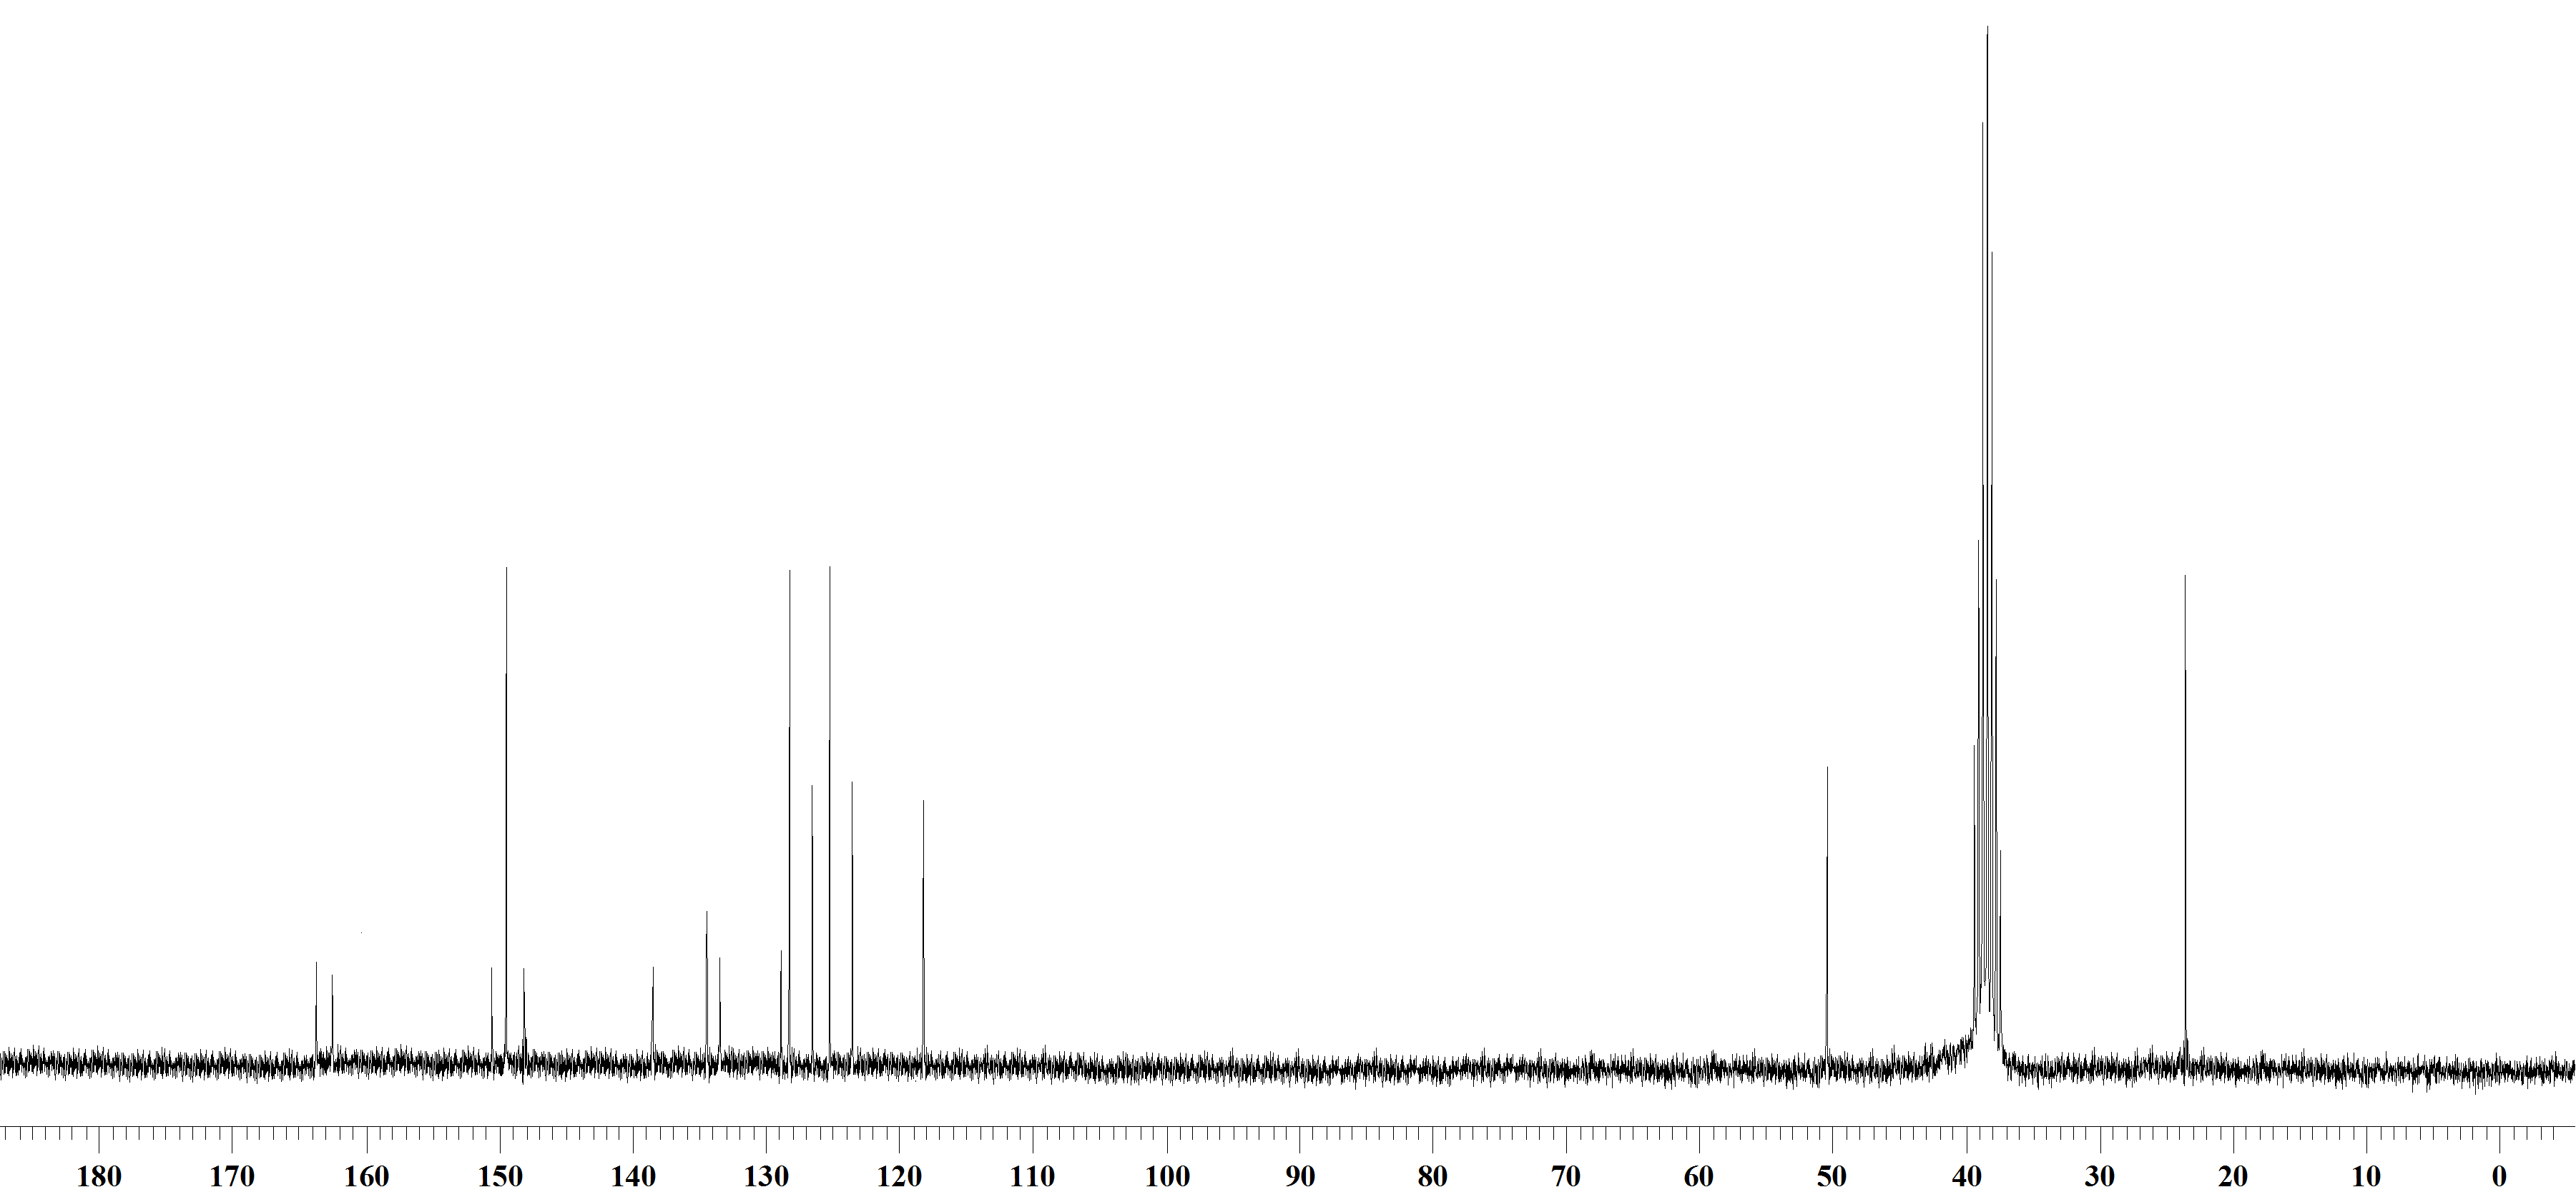


**13C NMR Spectrum of compound 27e in DMSO-*d6*(100 MHz)**


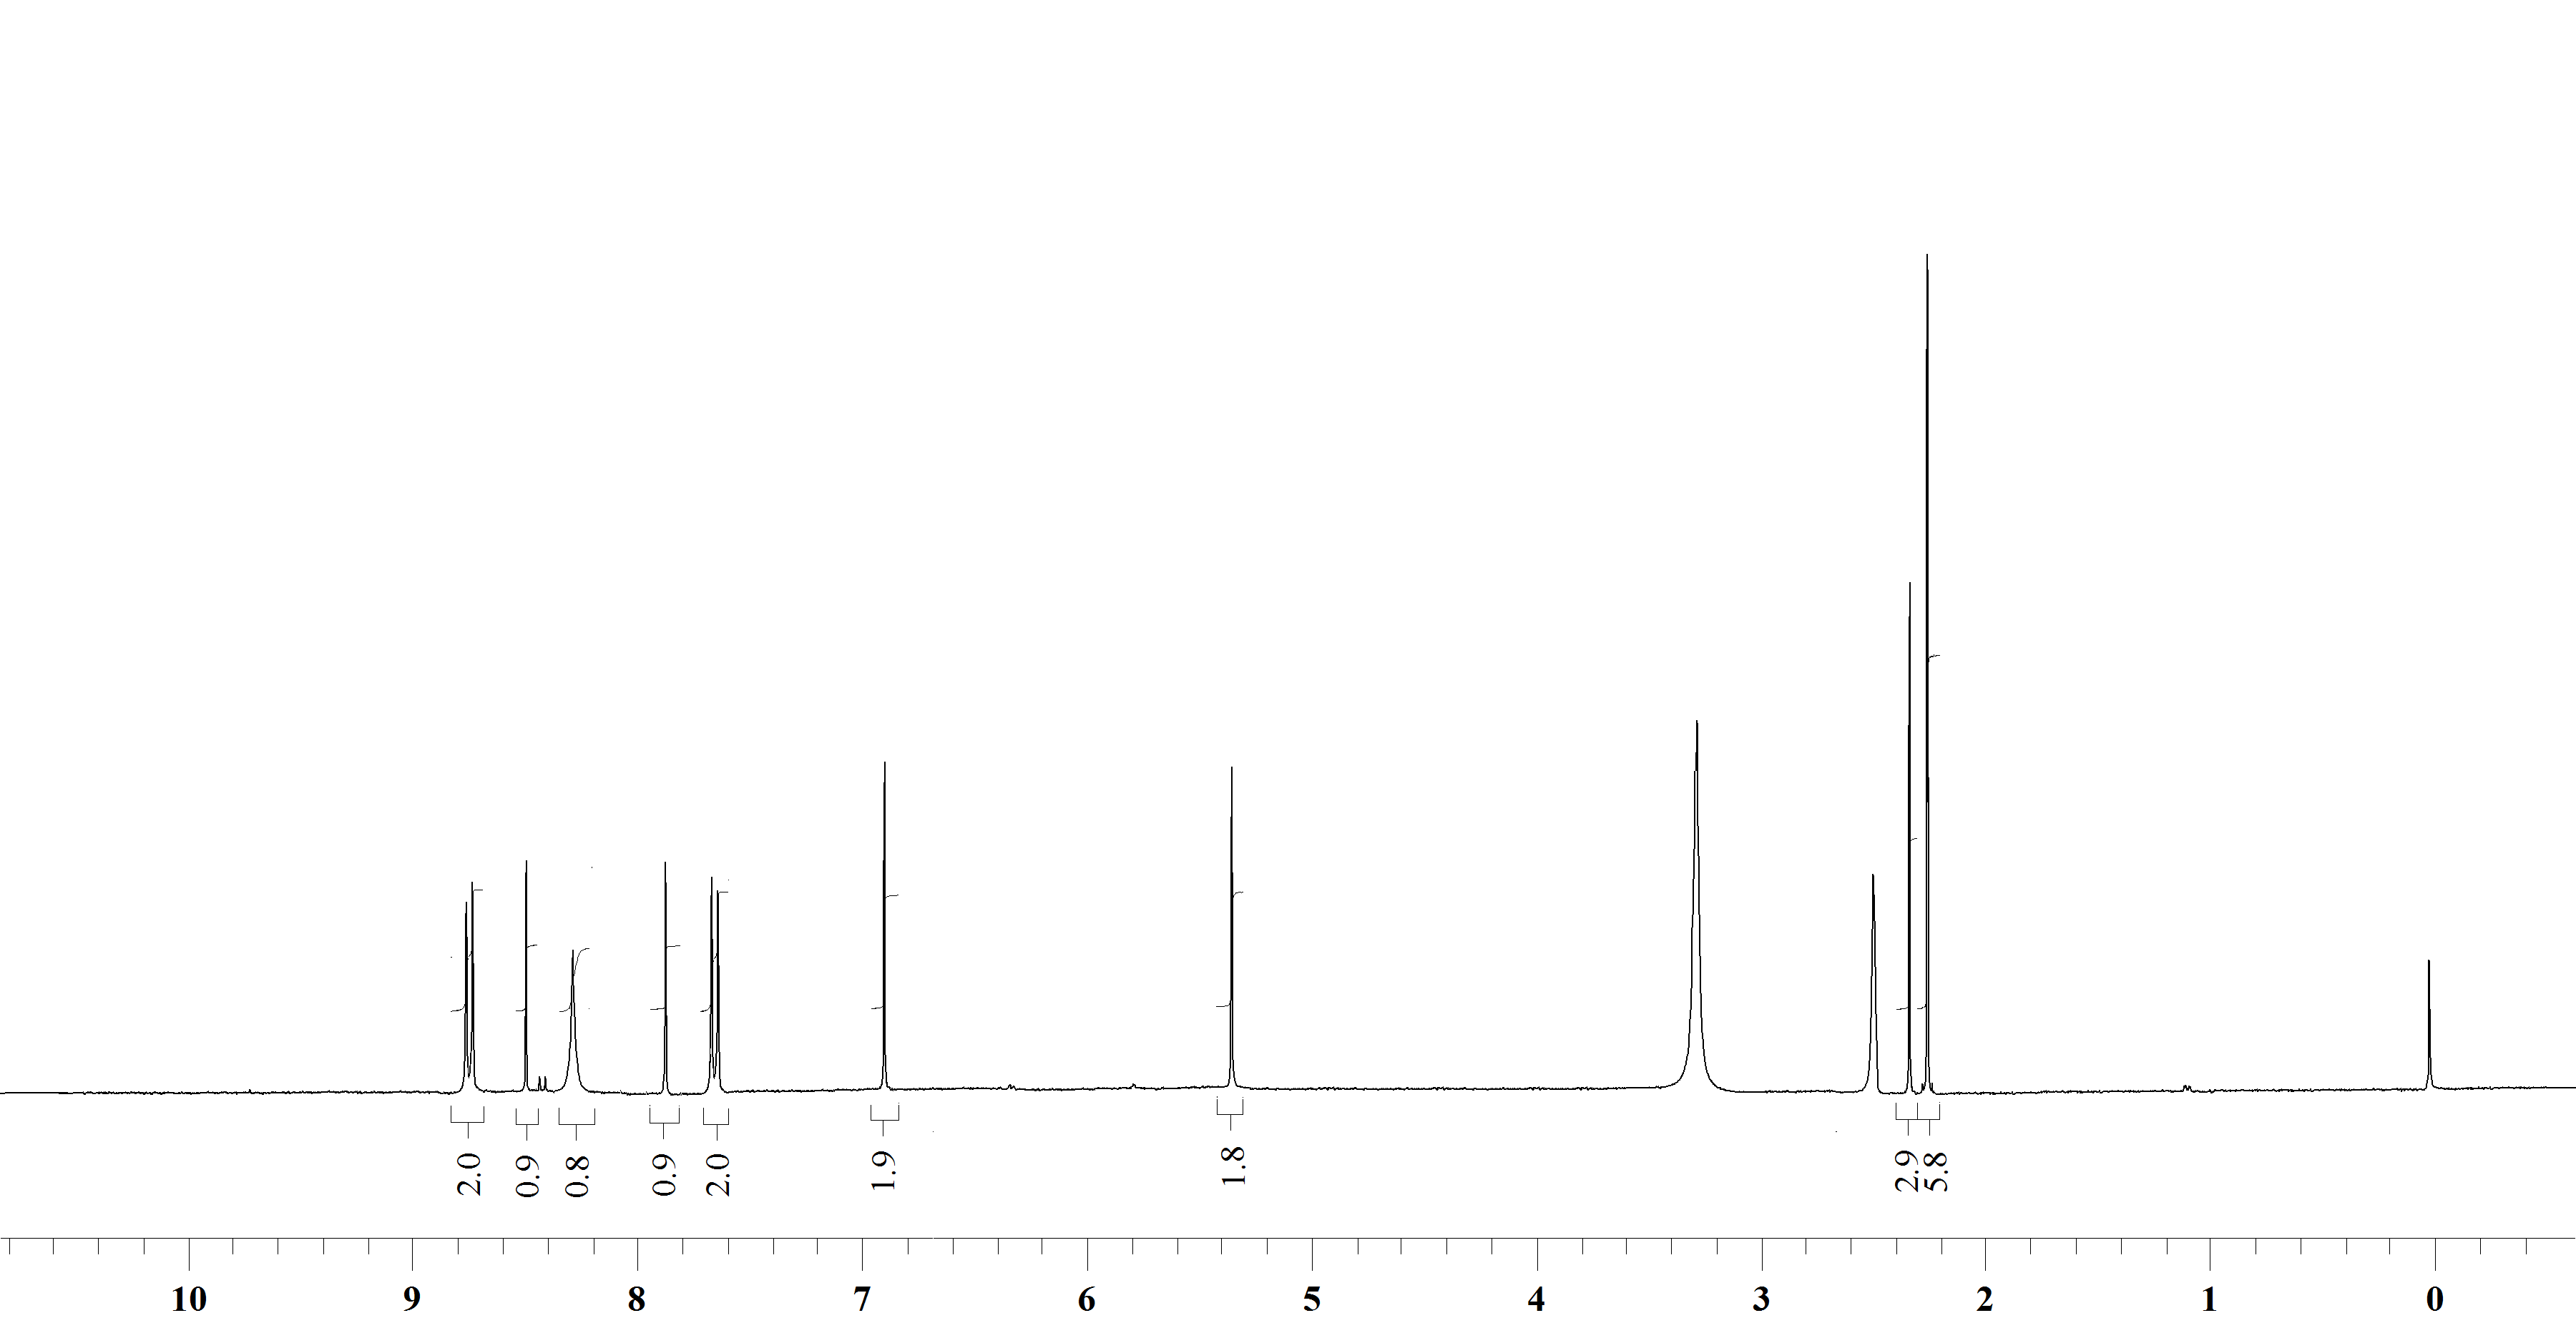


**1H NMR Spectrum of compound 27f in DMSO-*d6*(400 MHz)**


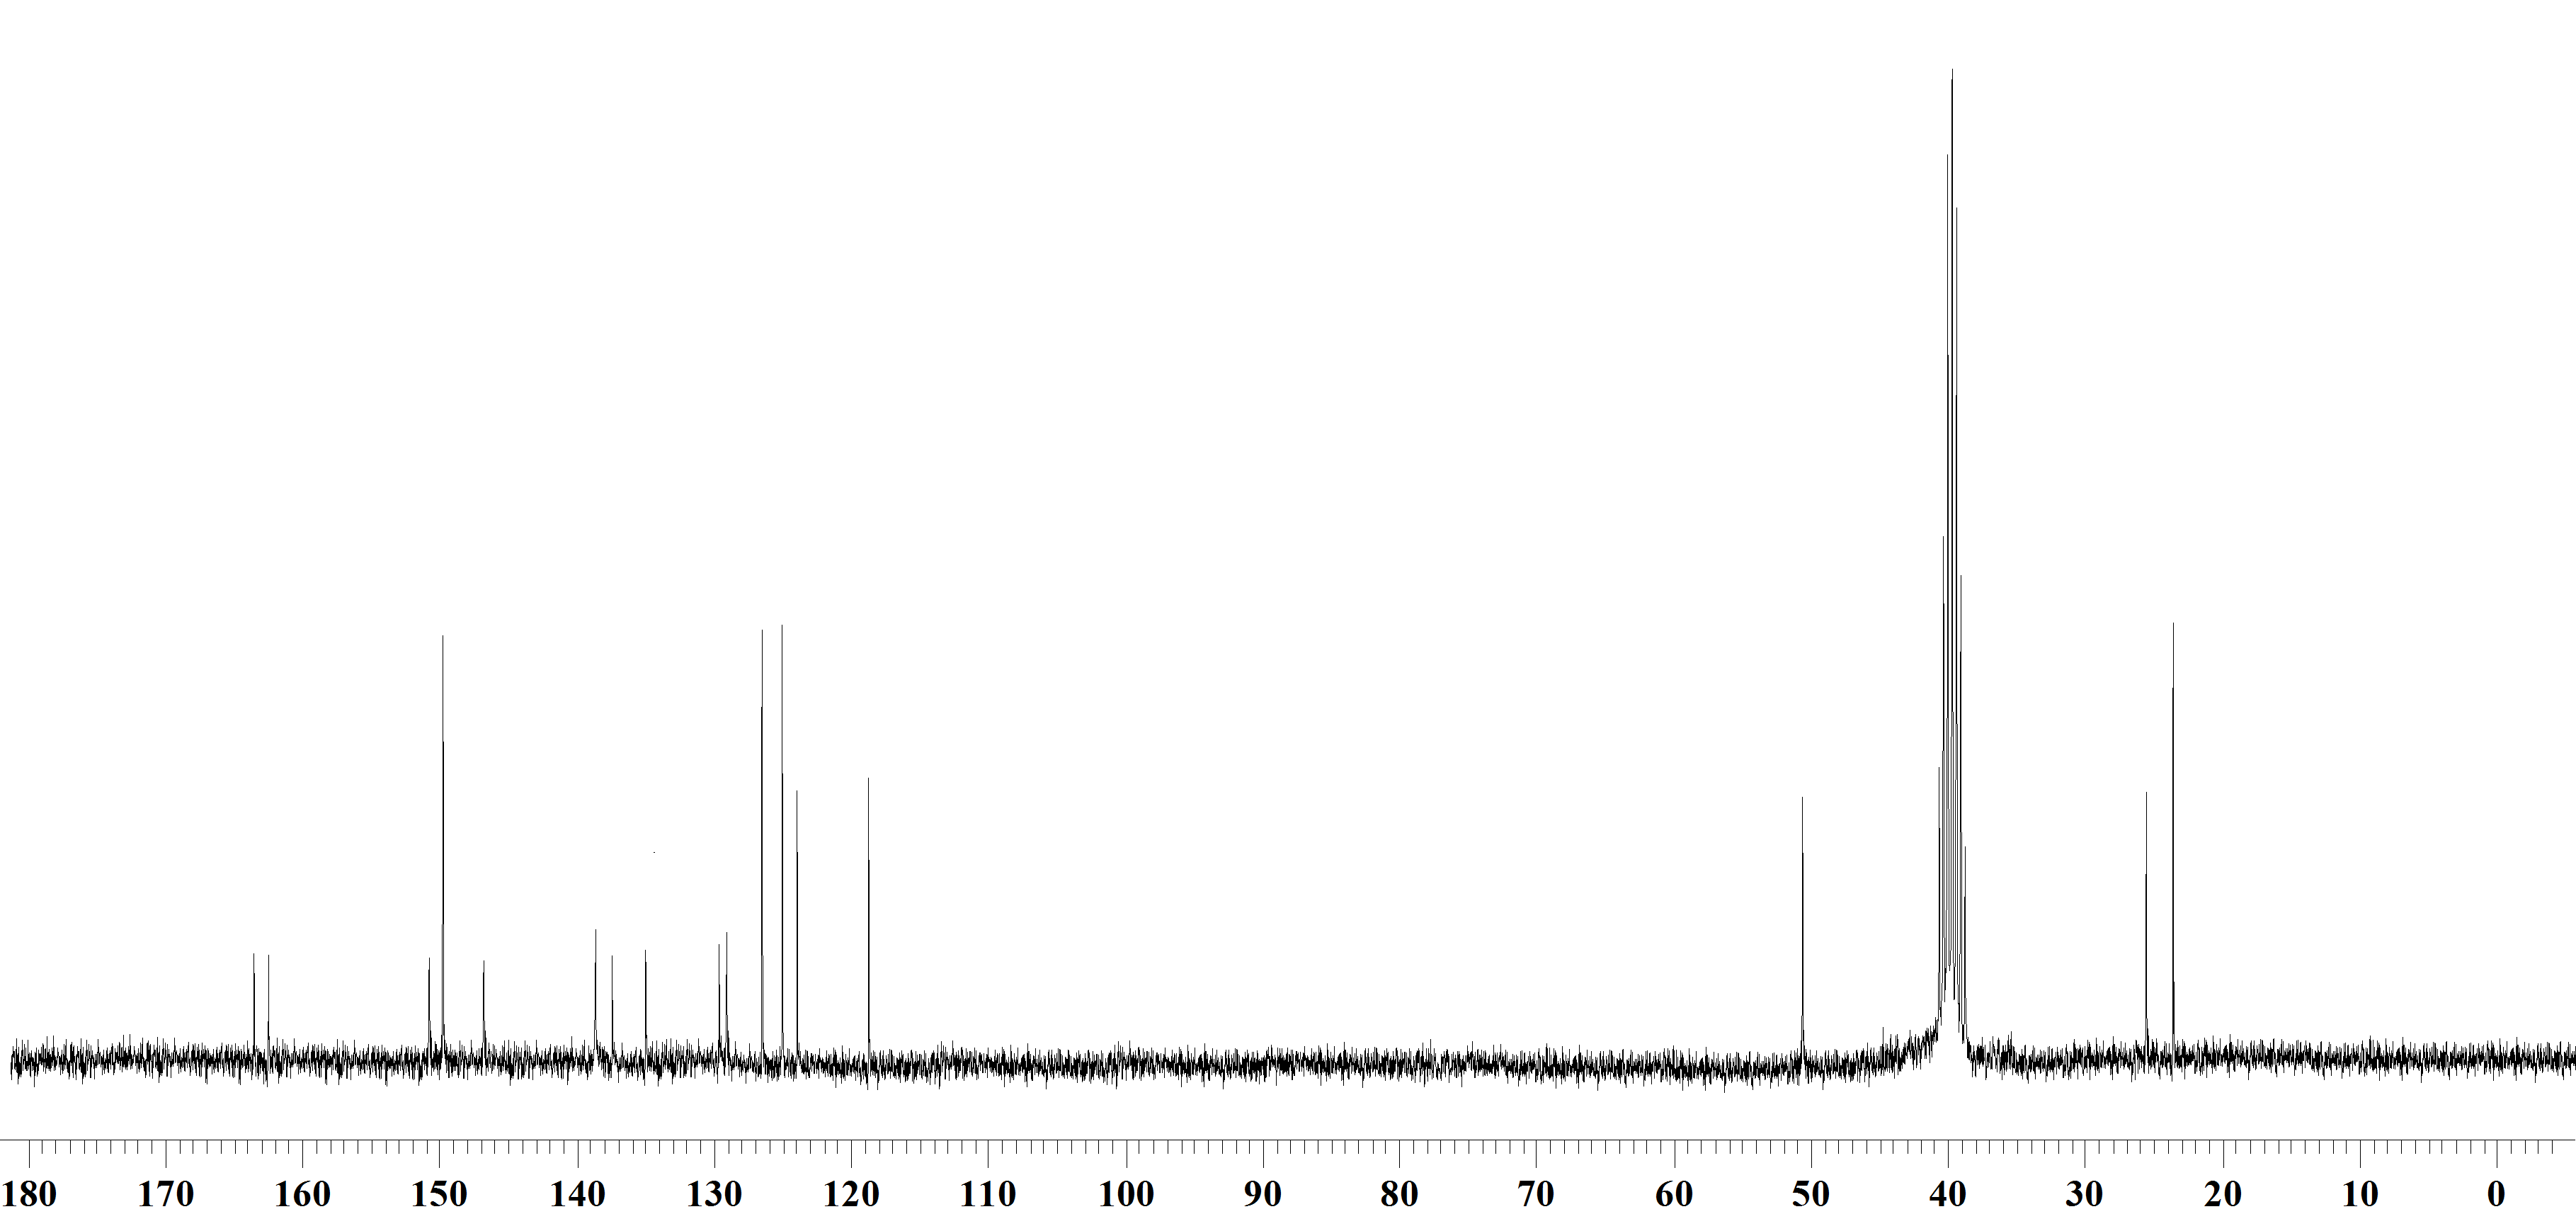


**13C NMR Spectrum of compound 27f in DMSO-*d6*(100 MHz)**


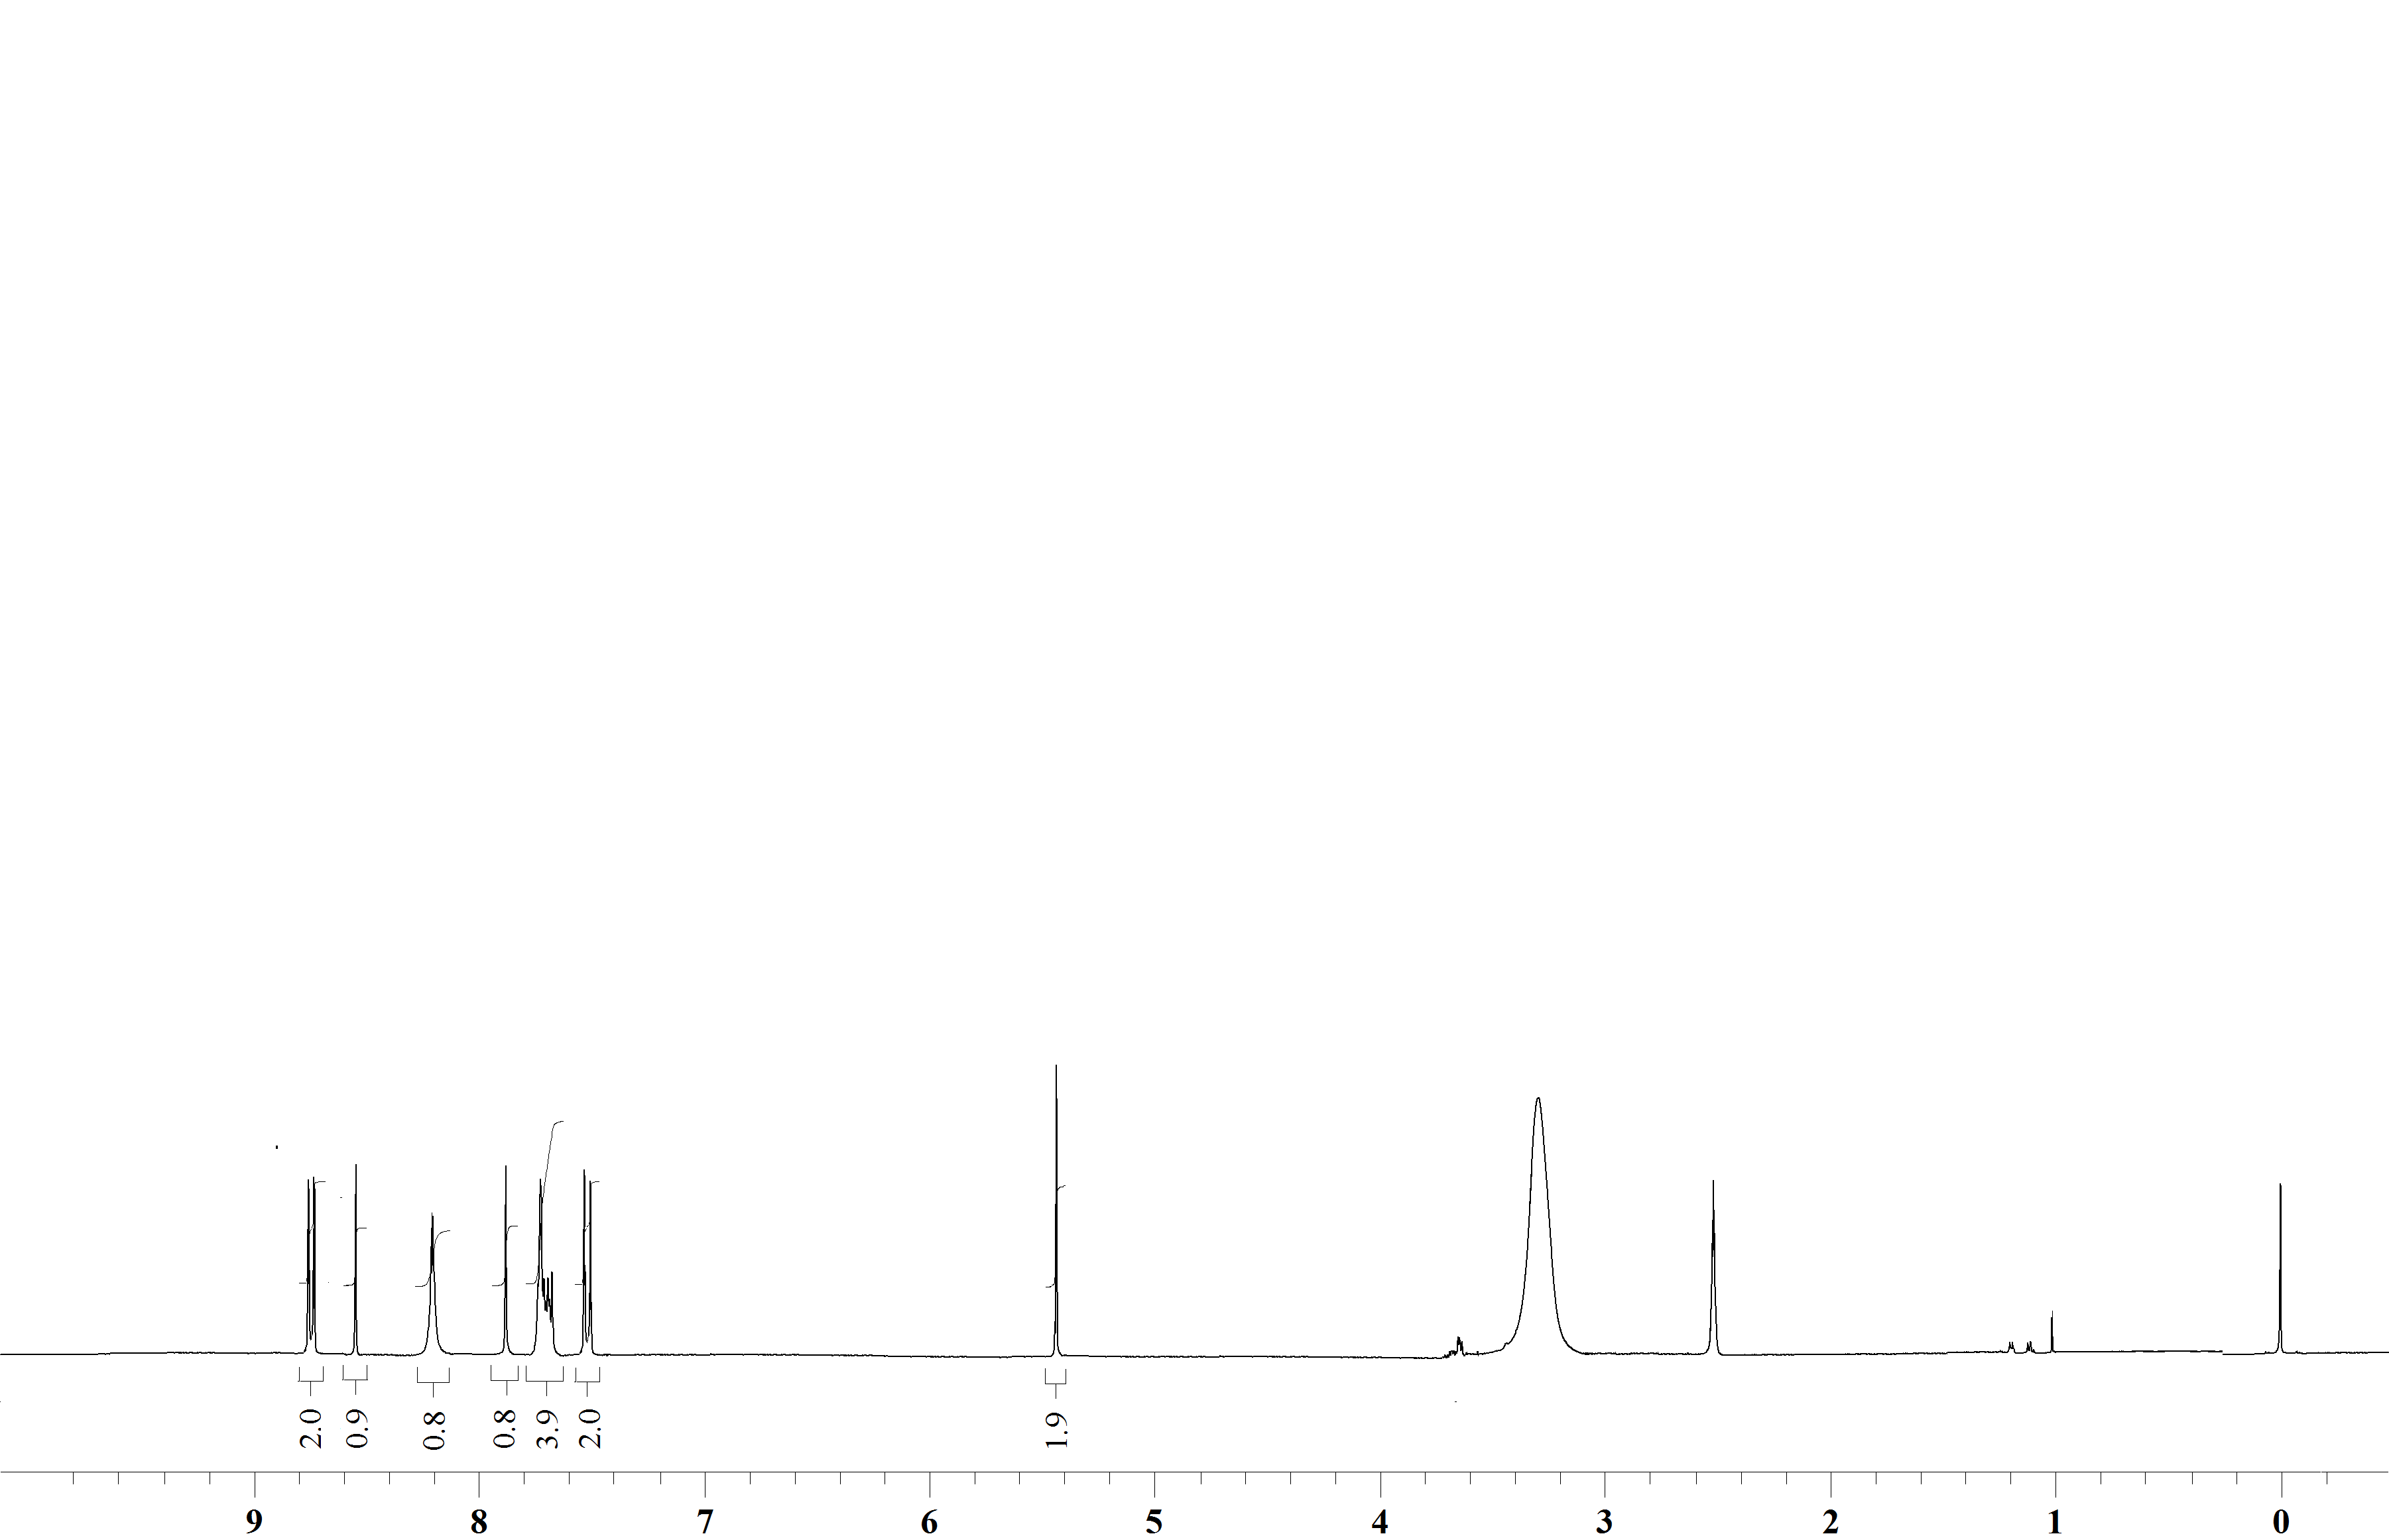


**1H NMR Spectrum of compound 27g in DMSO-*d6*(400 MHz)**


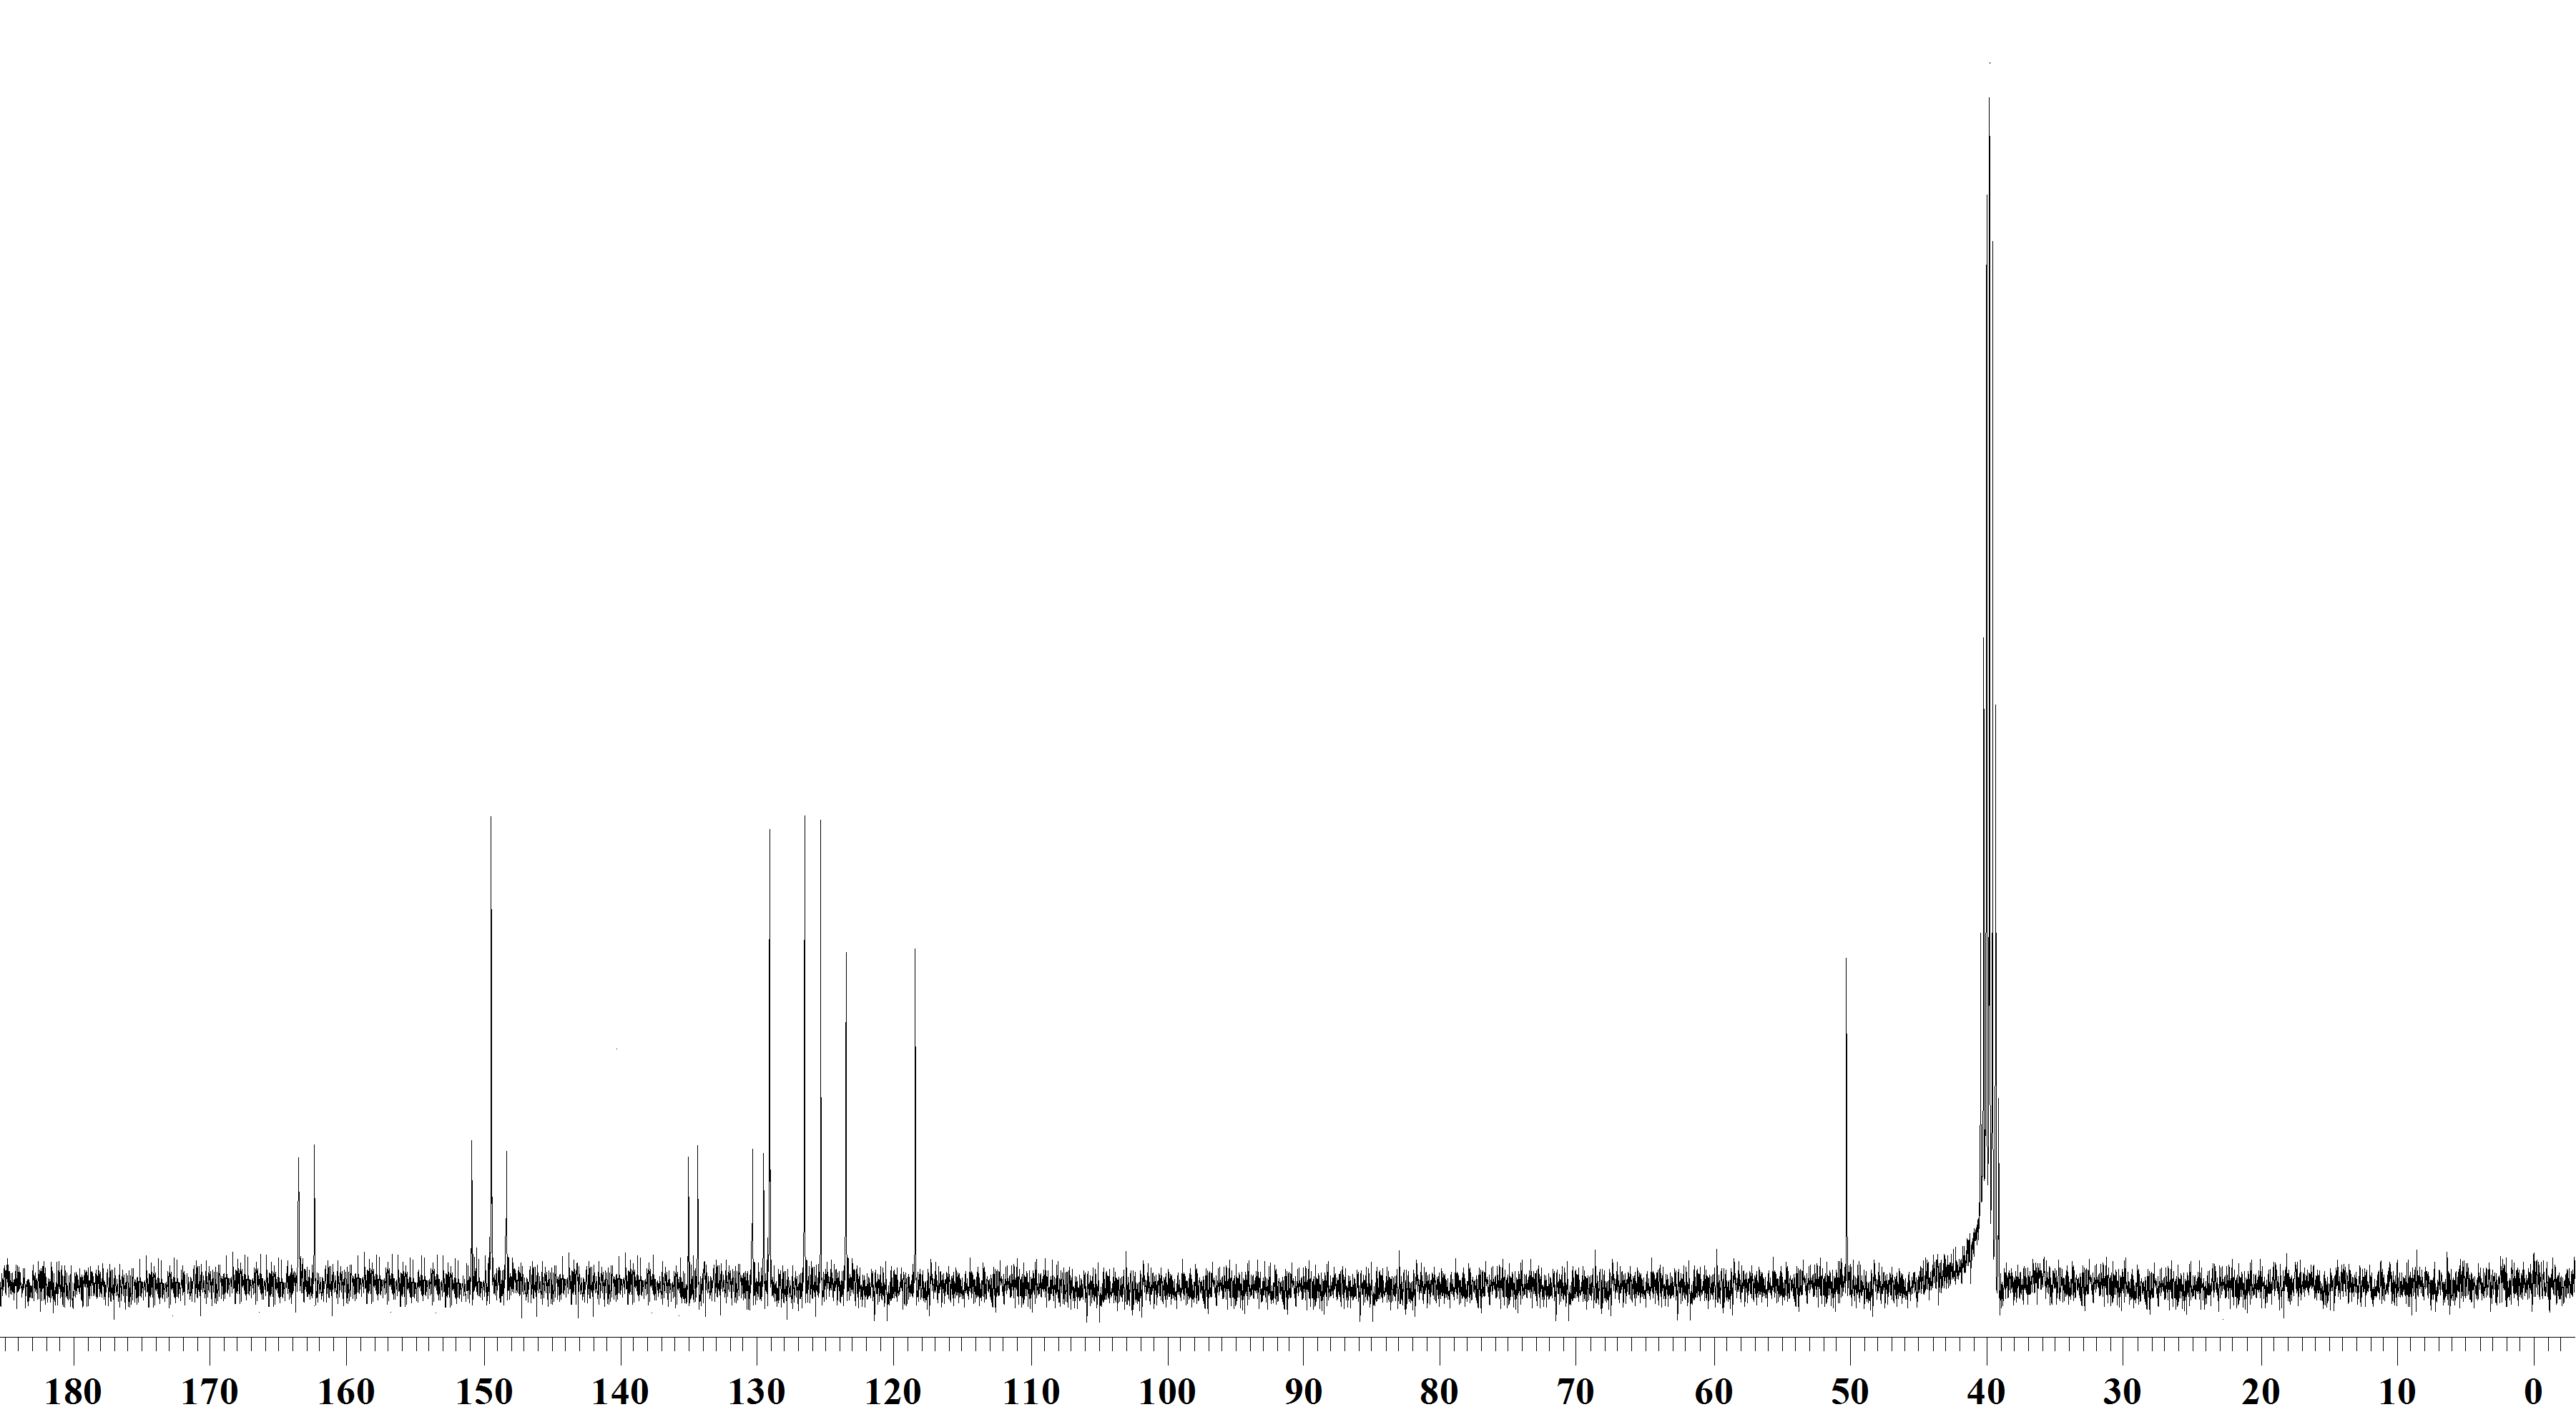


**13C NMR Spectrum of compound 27g in DMSO-*d6*(100 MHz)**


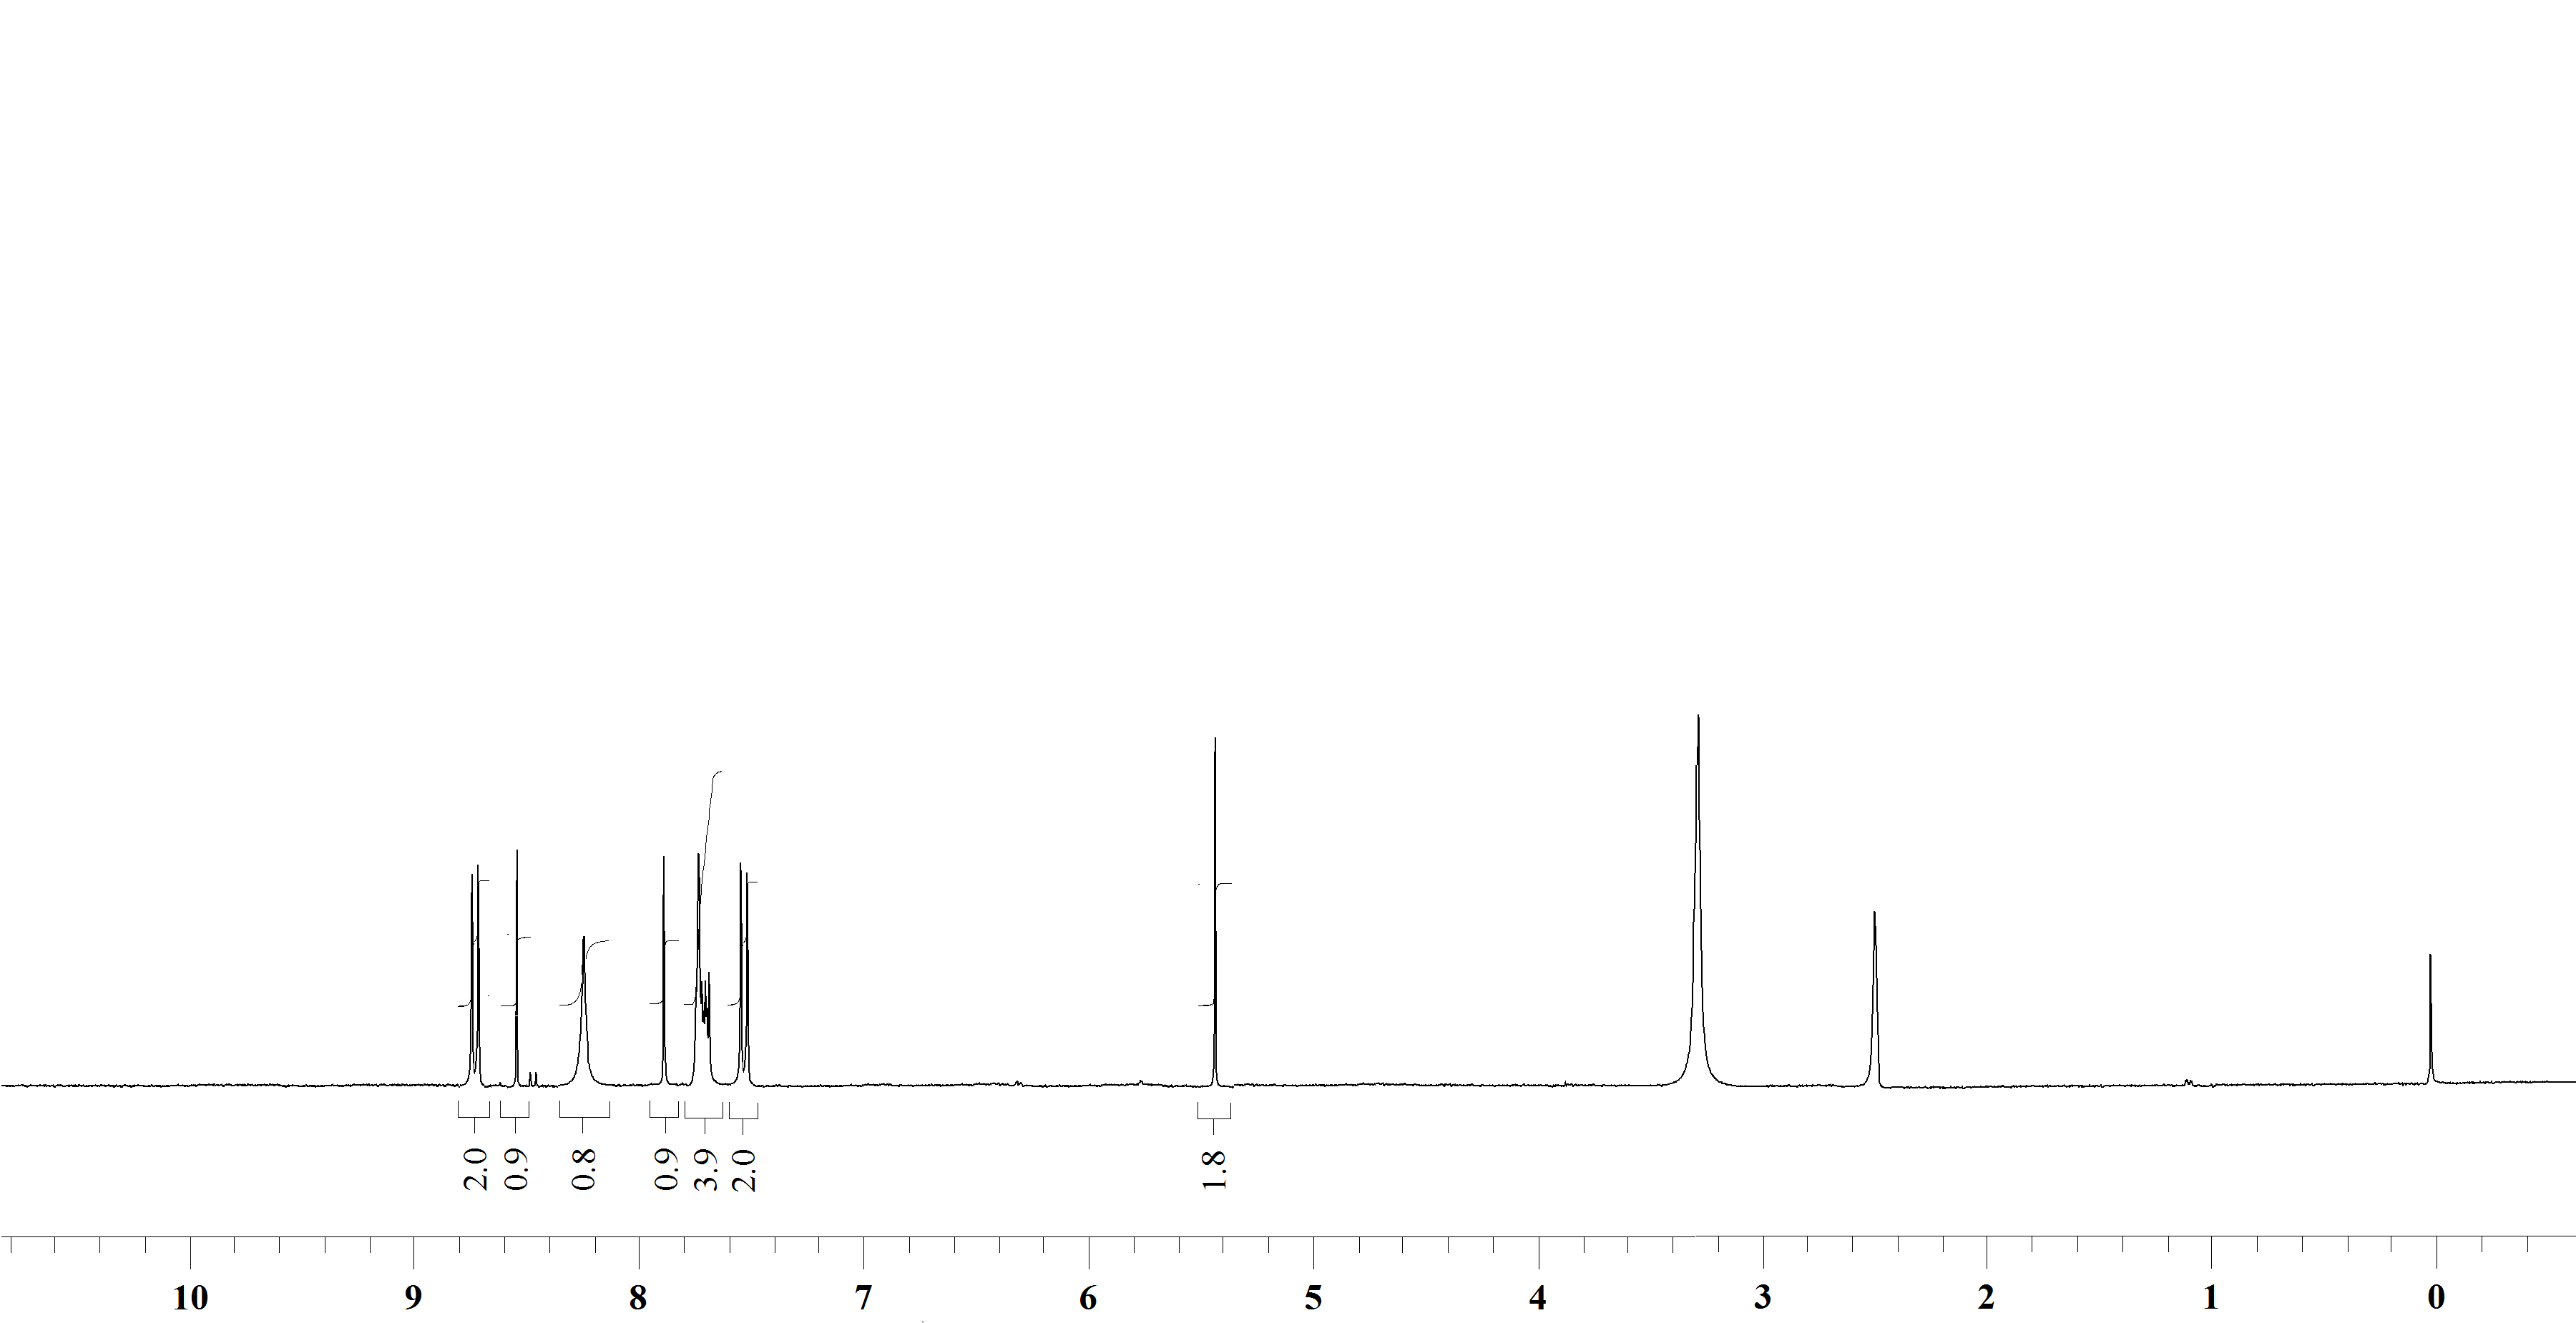

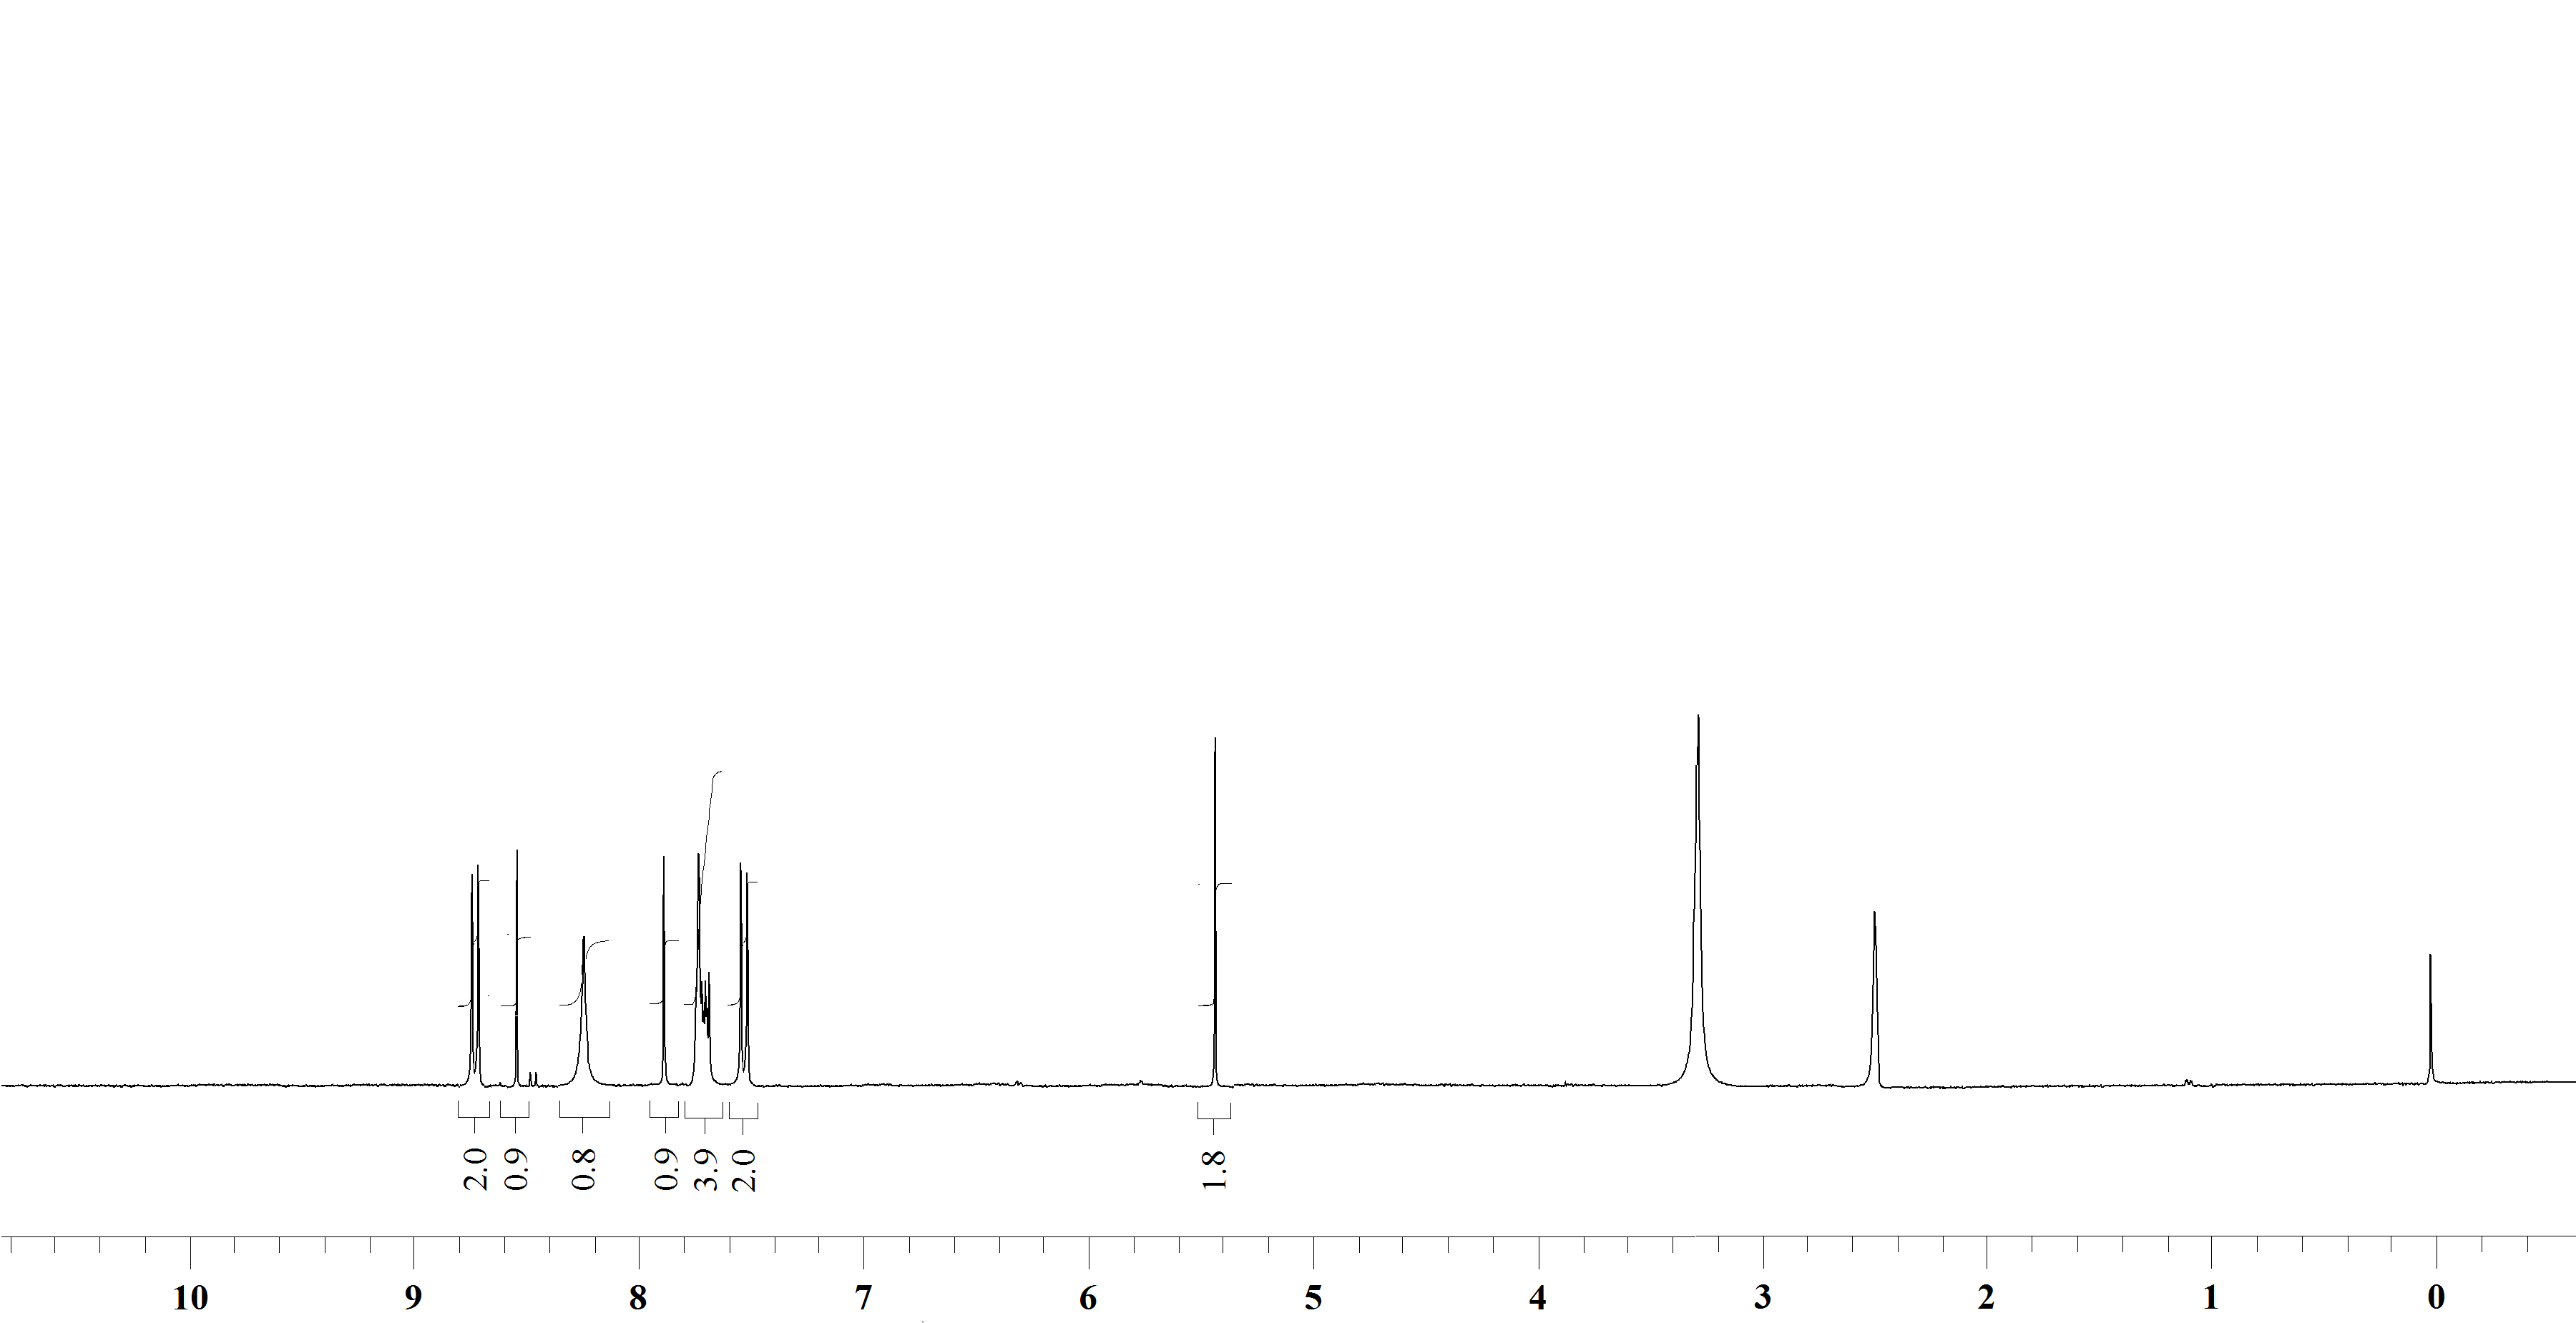


**1H NMR Spectrum of compound 27h in DMSO-*d6*(400 MHz)**


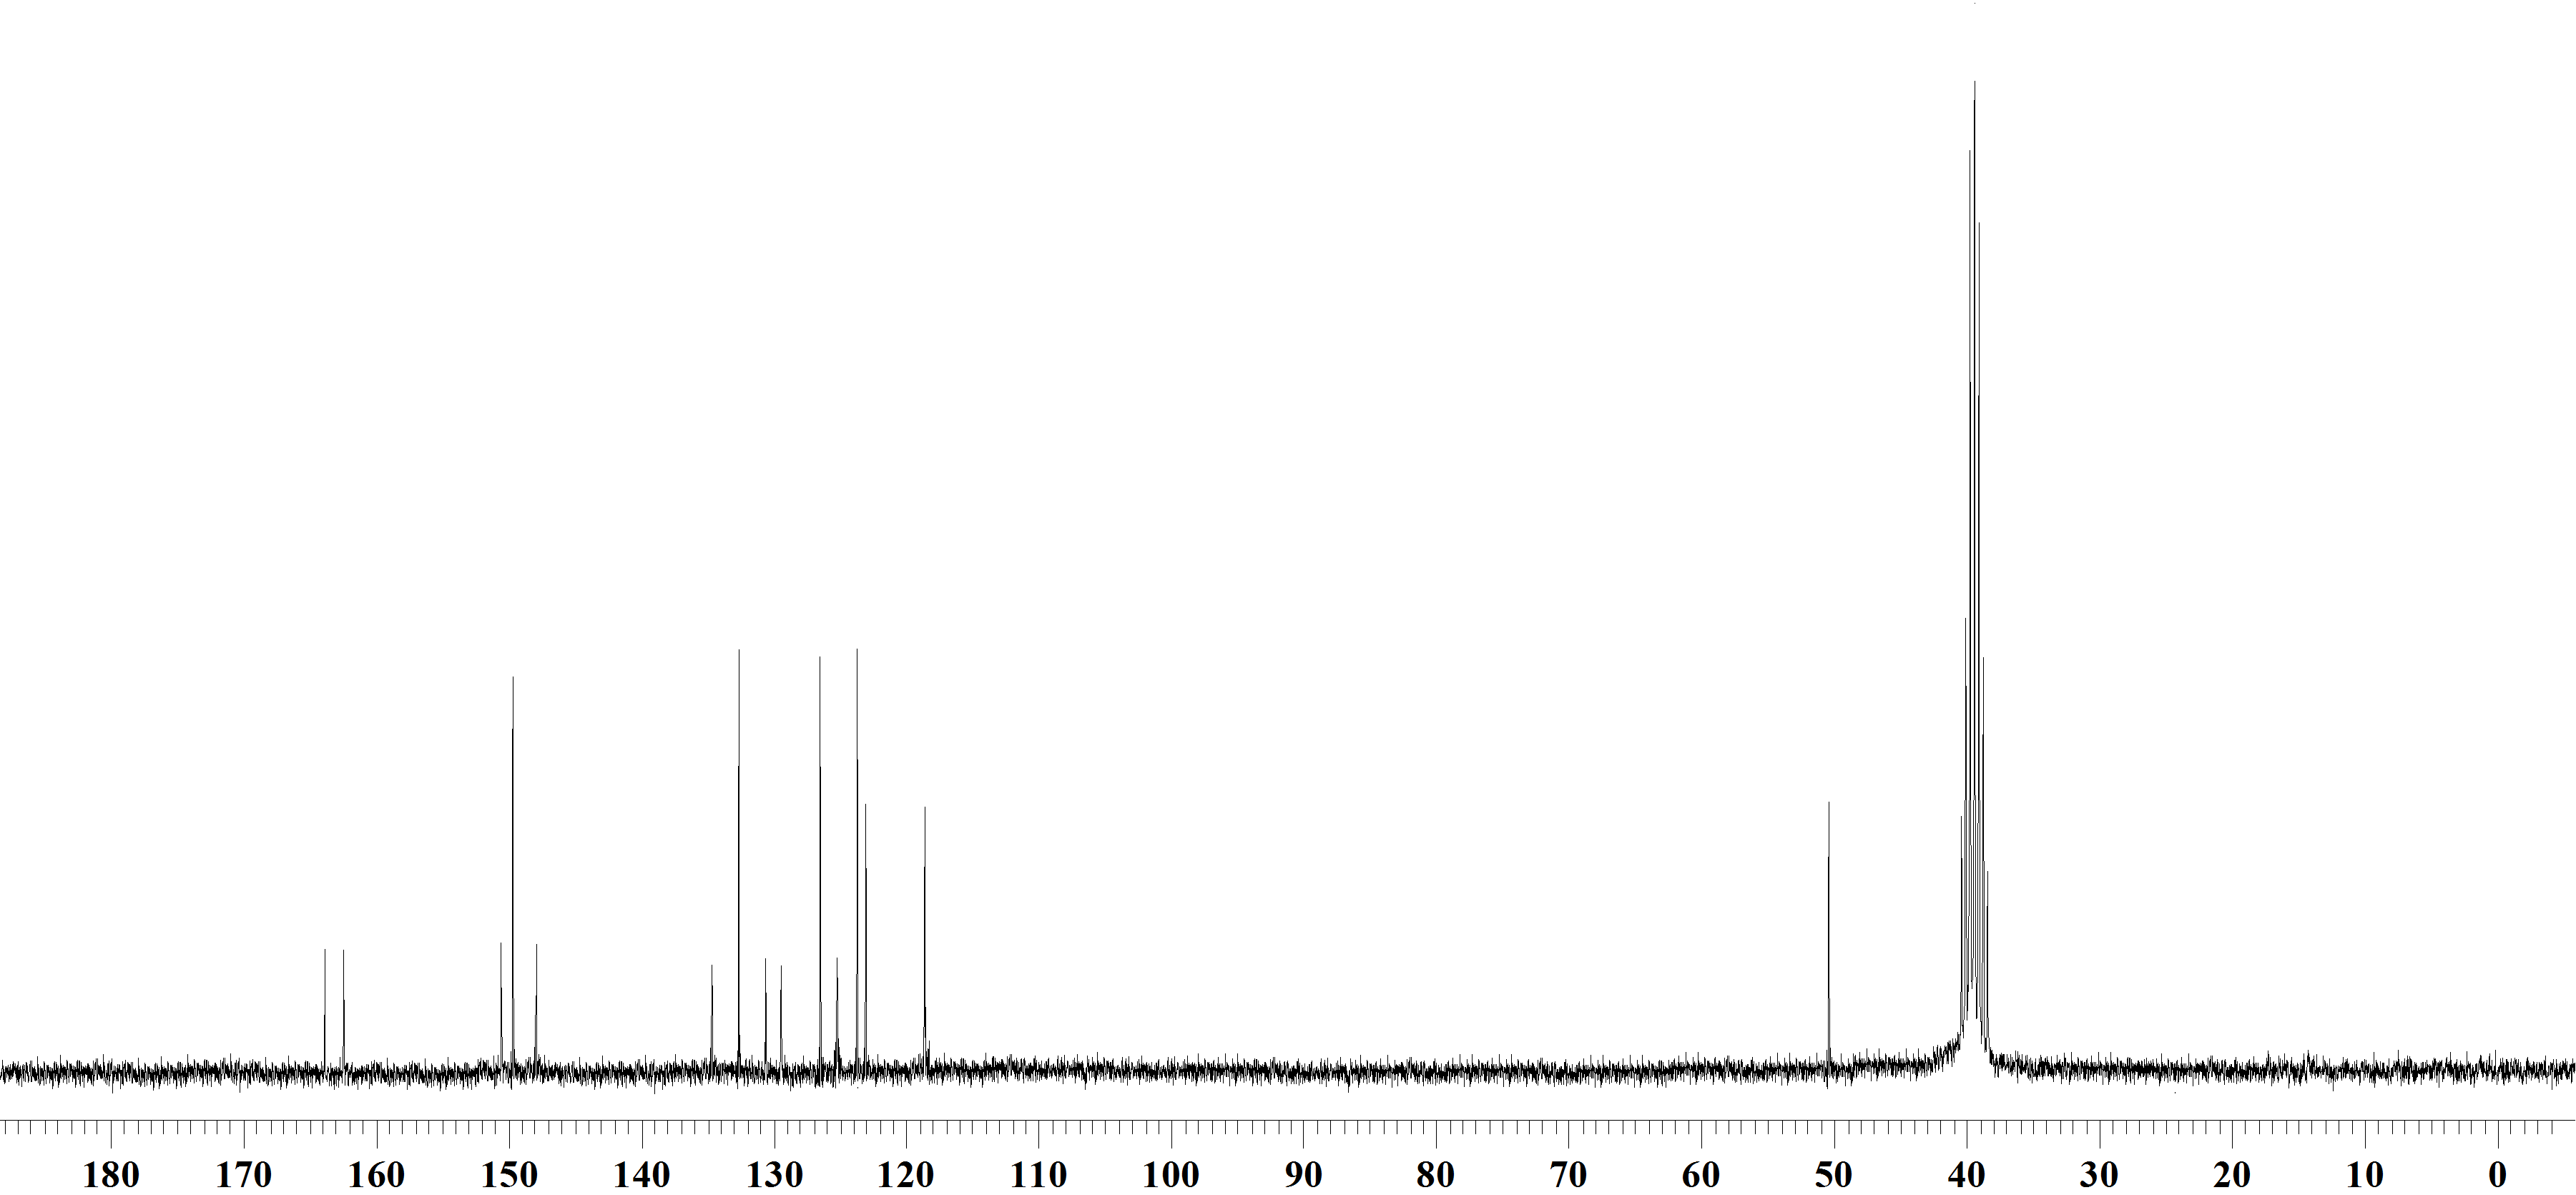


**13C NMR Spectrum of compound 27h in DMSO-*d6*(100 MHz)**


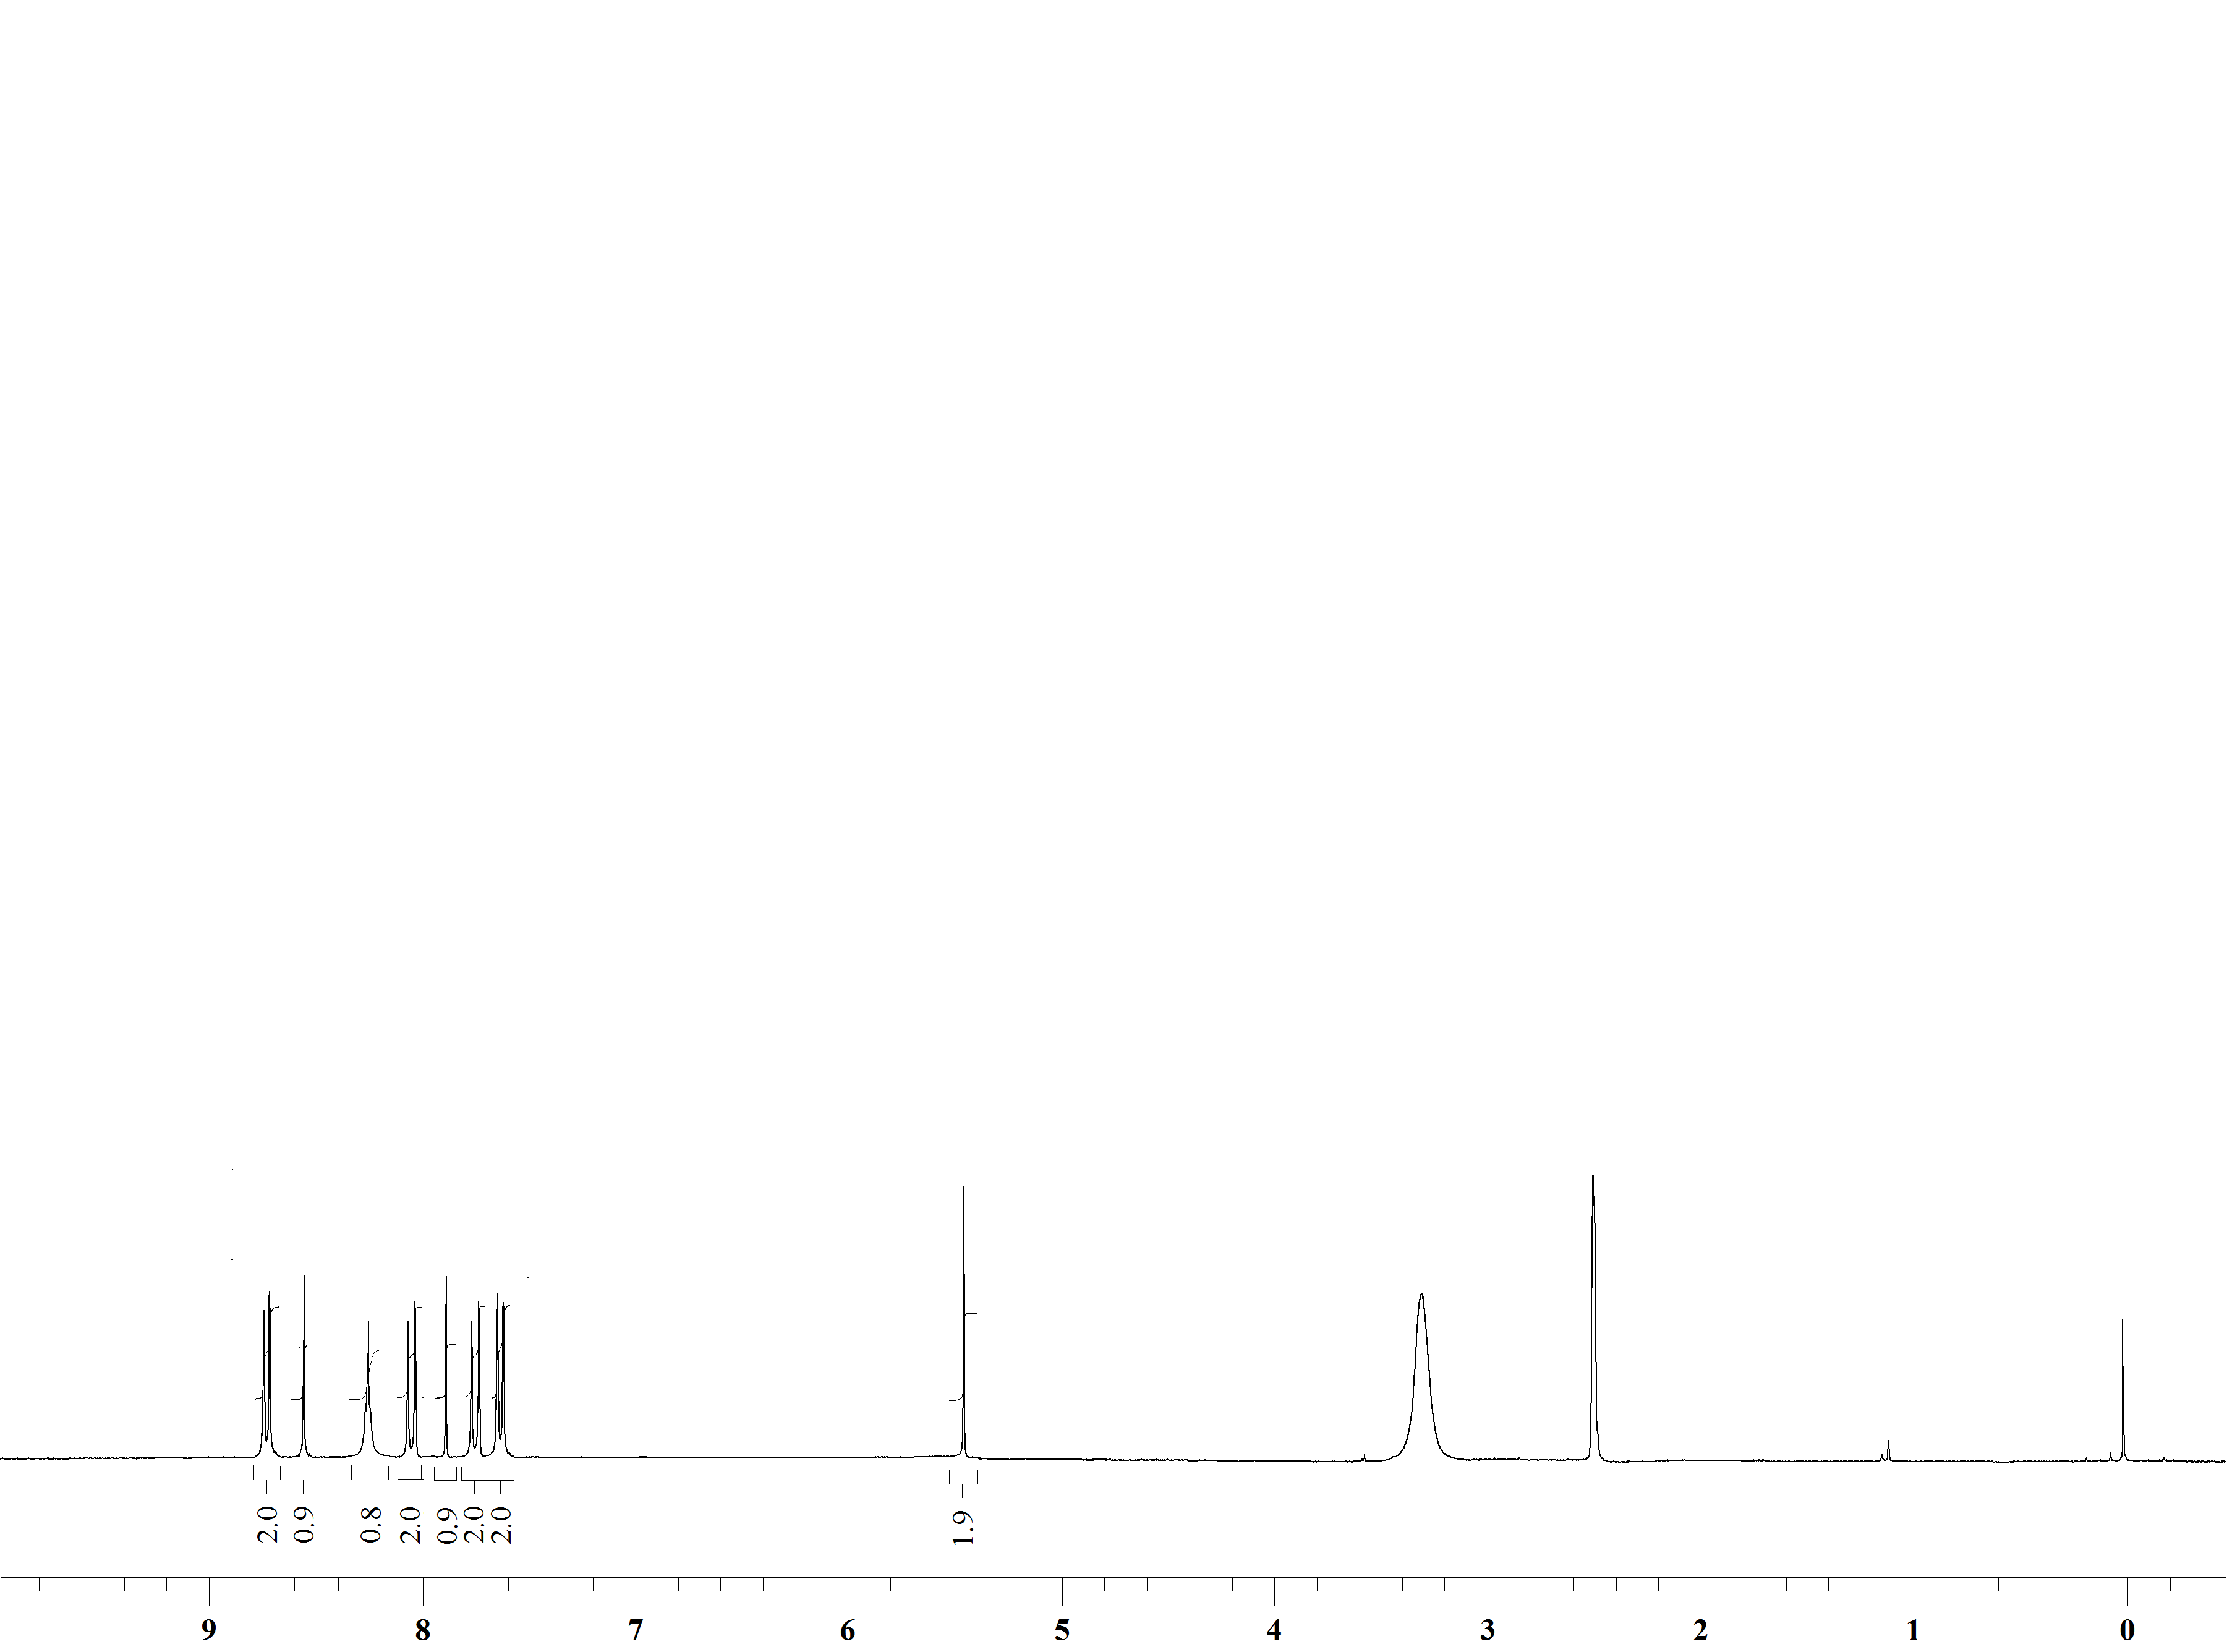


**1H NMR Spectrum of compound 27i in DMSO-*d6*(400 MHz)**


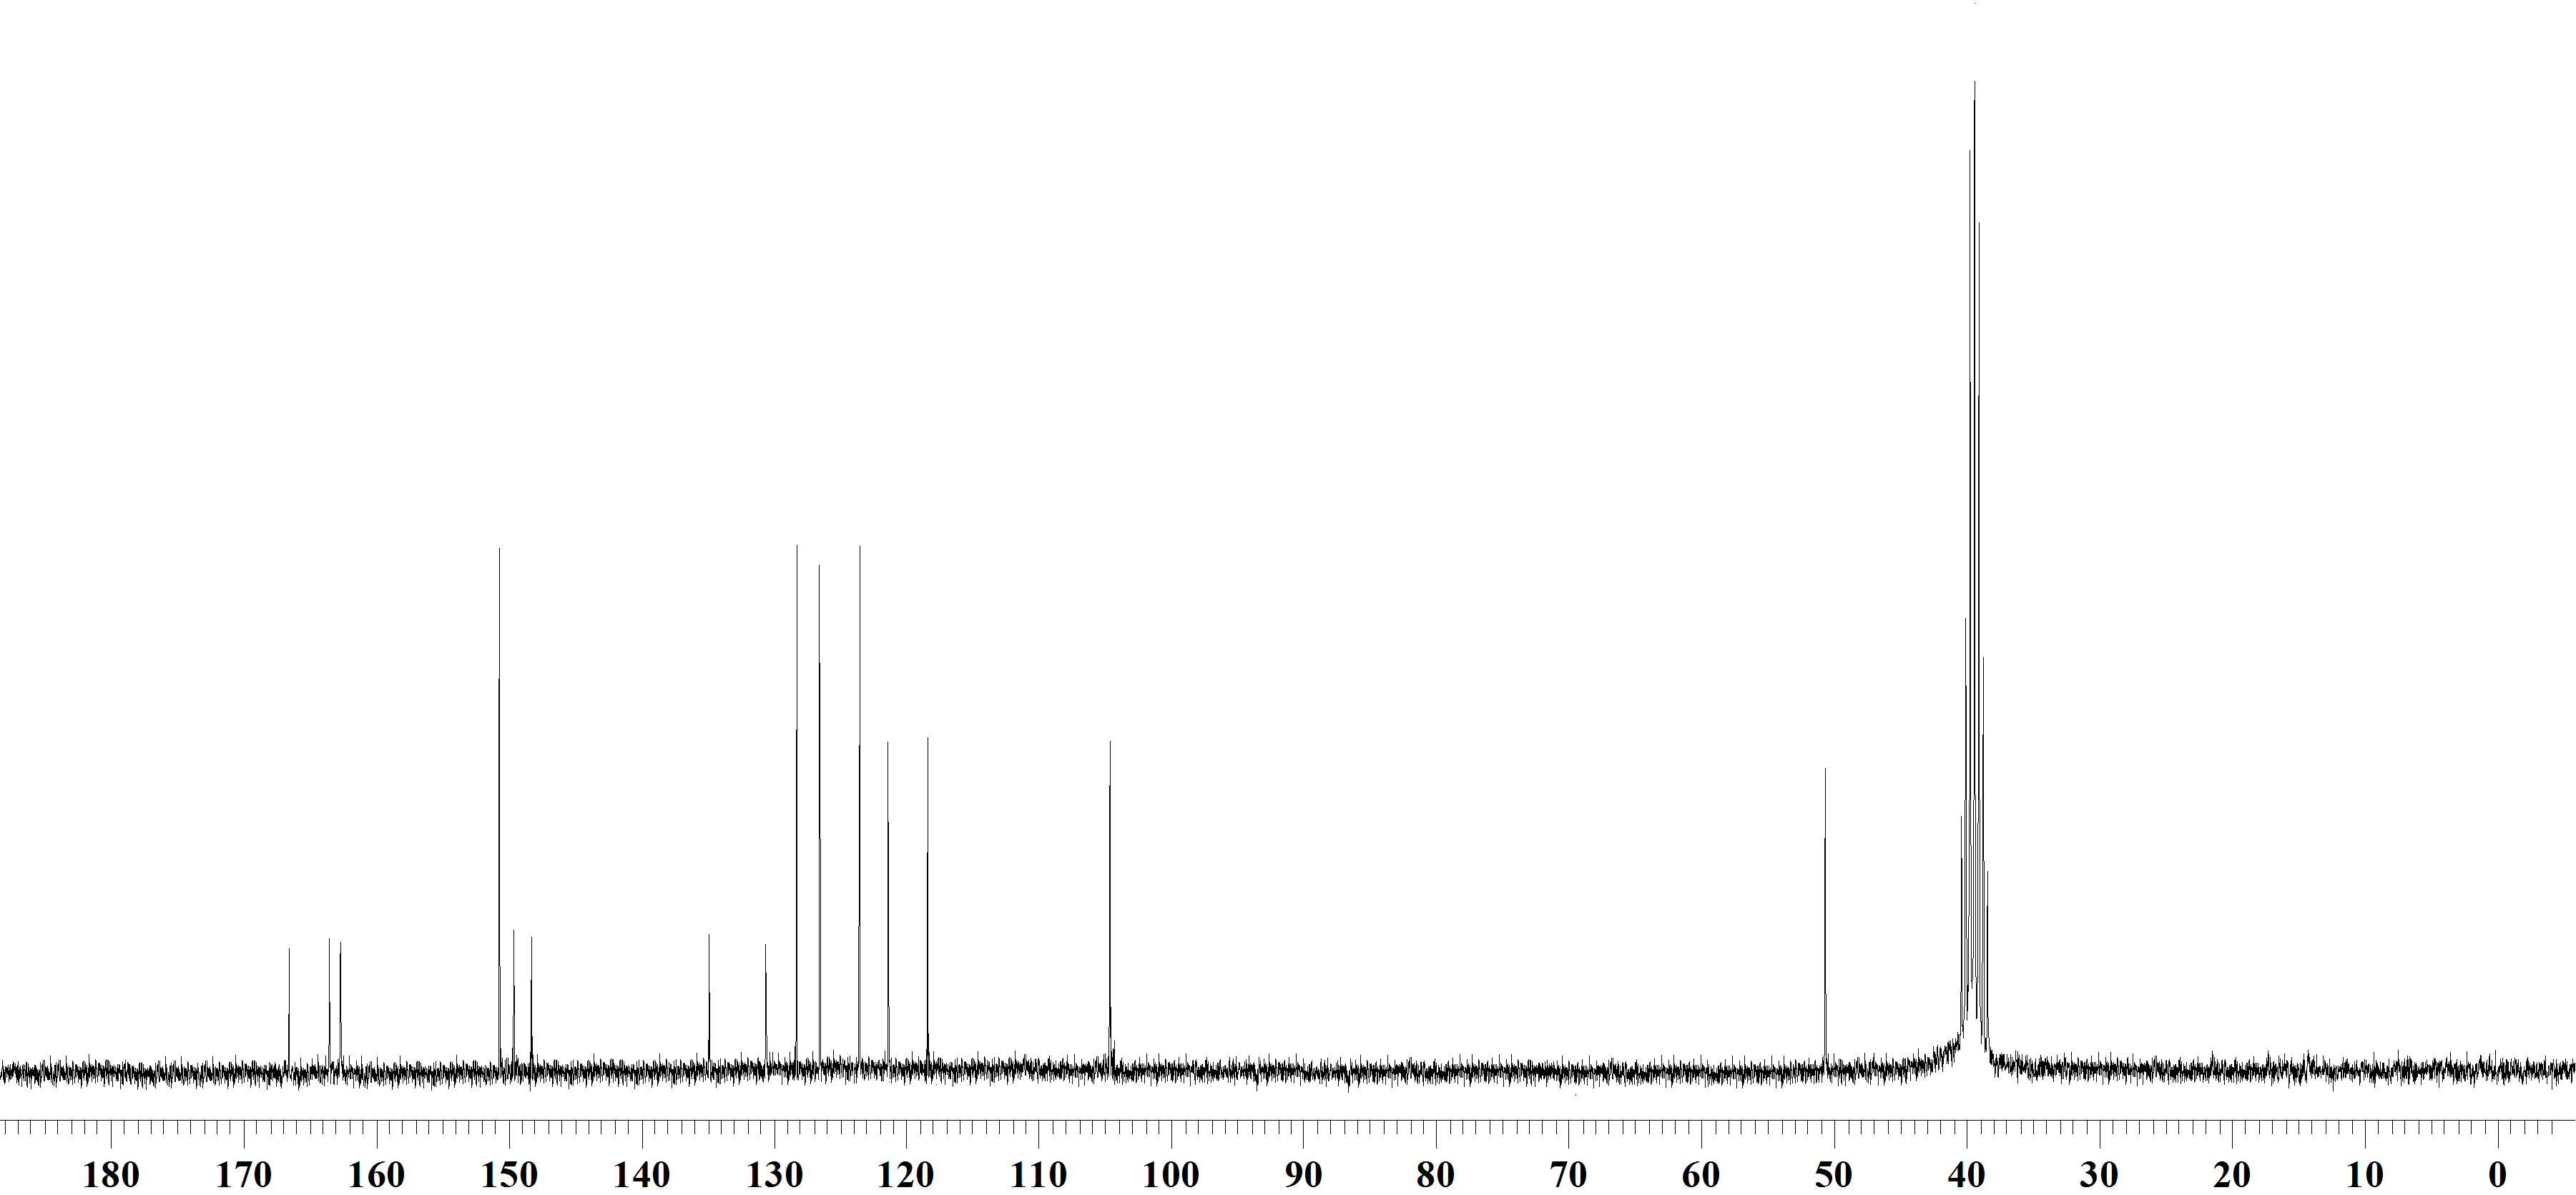


**13C NMR Spectrum of compound 27i in DMSO-*d6*(100 MHz)**


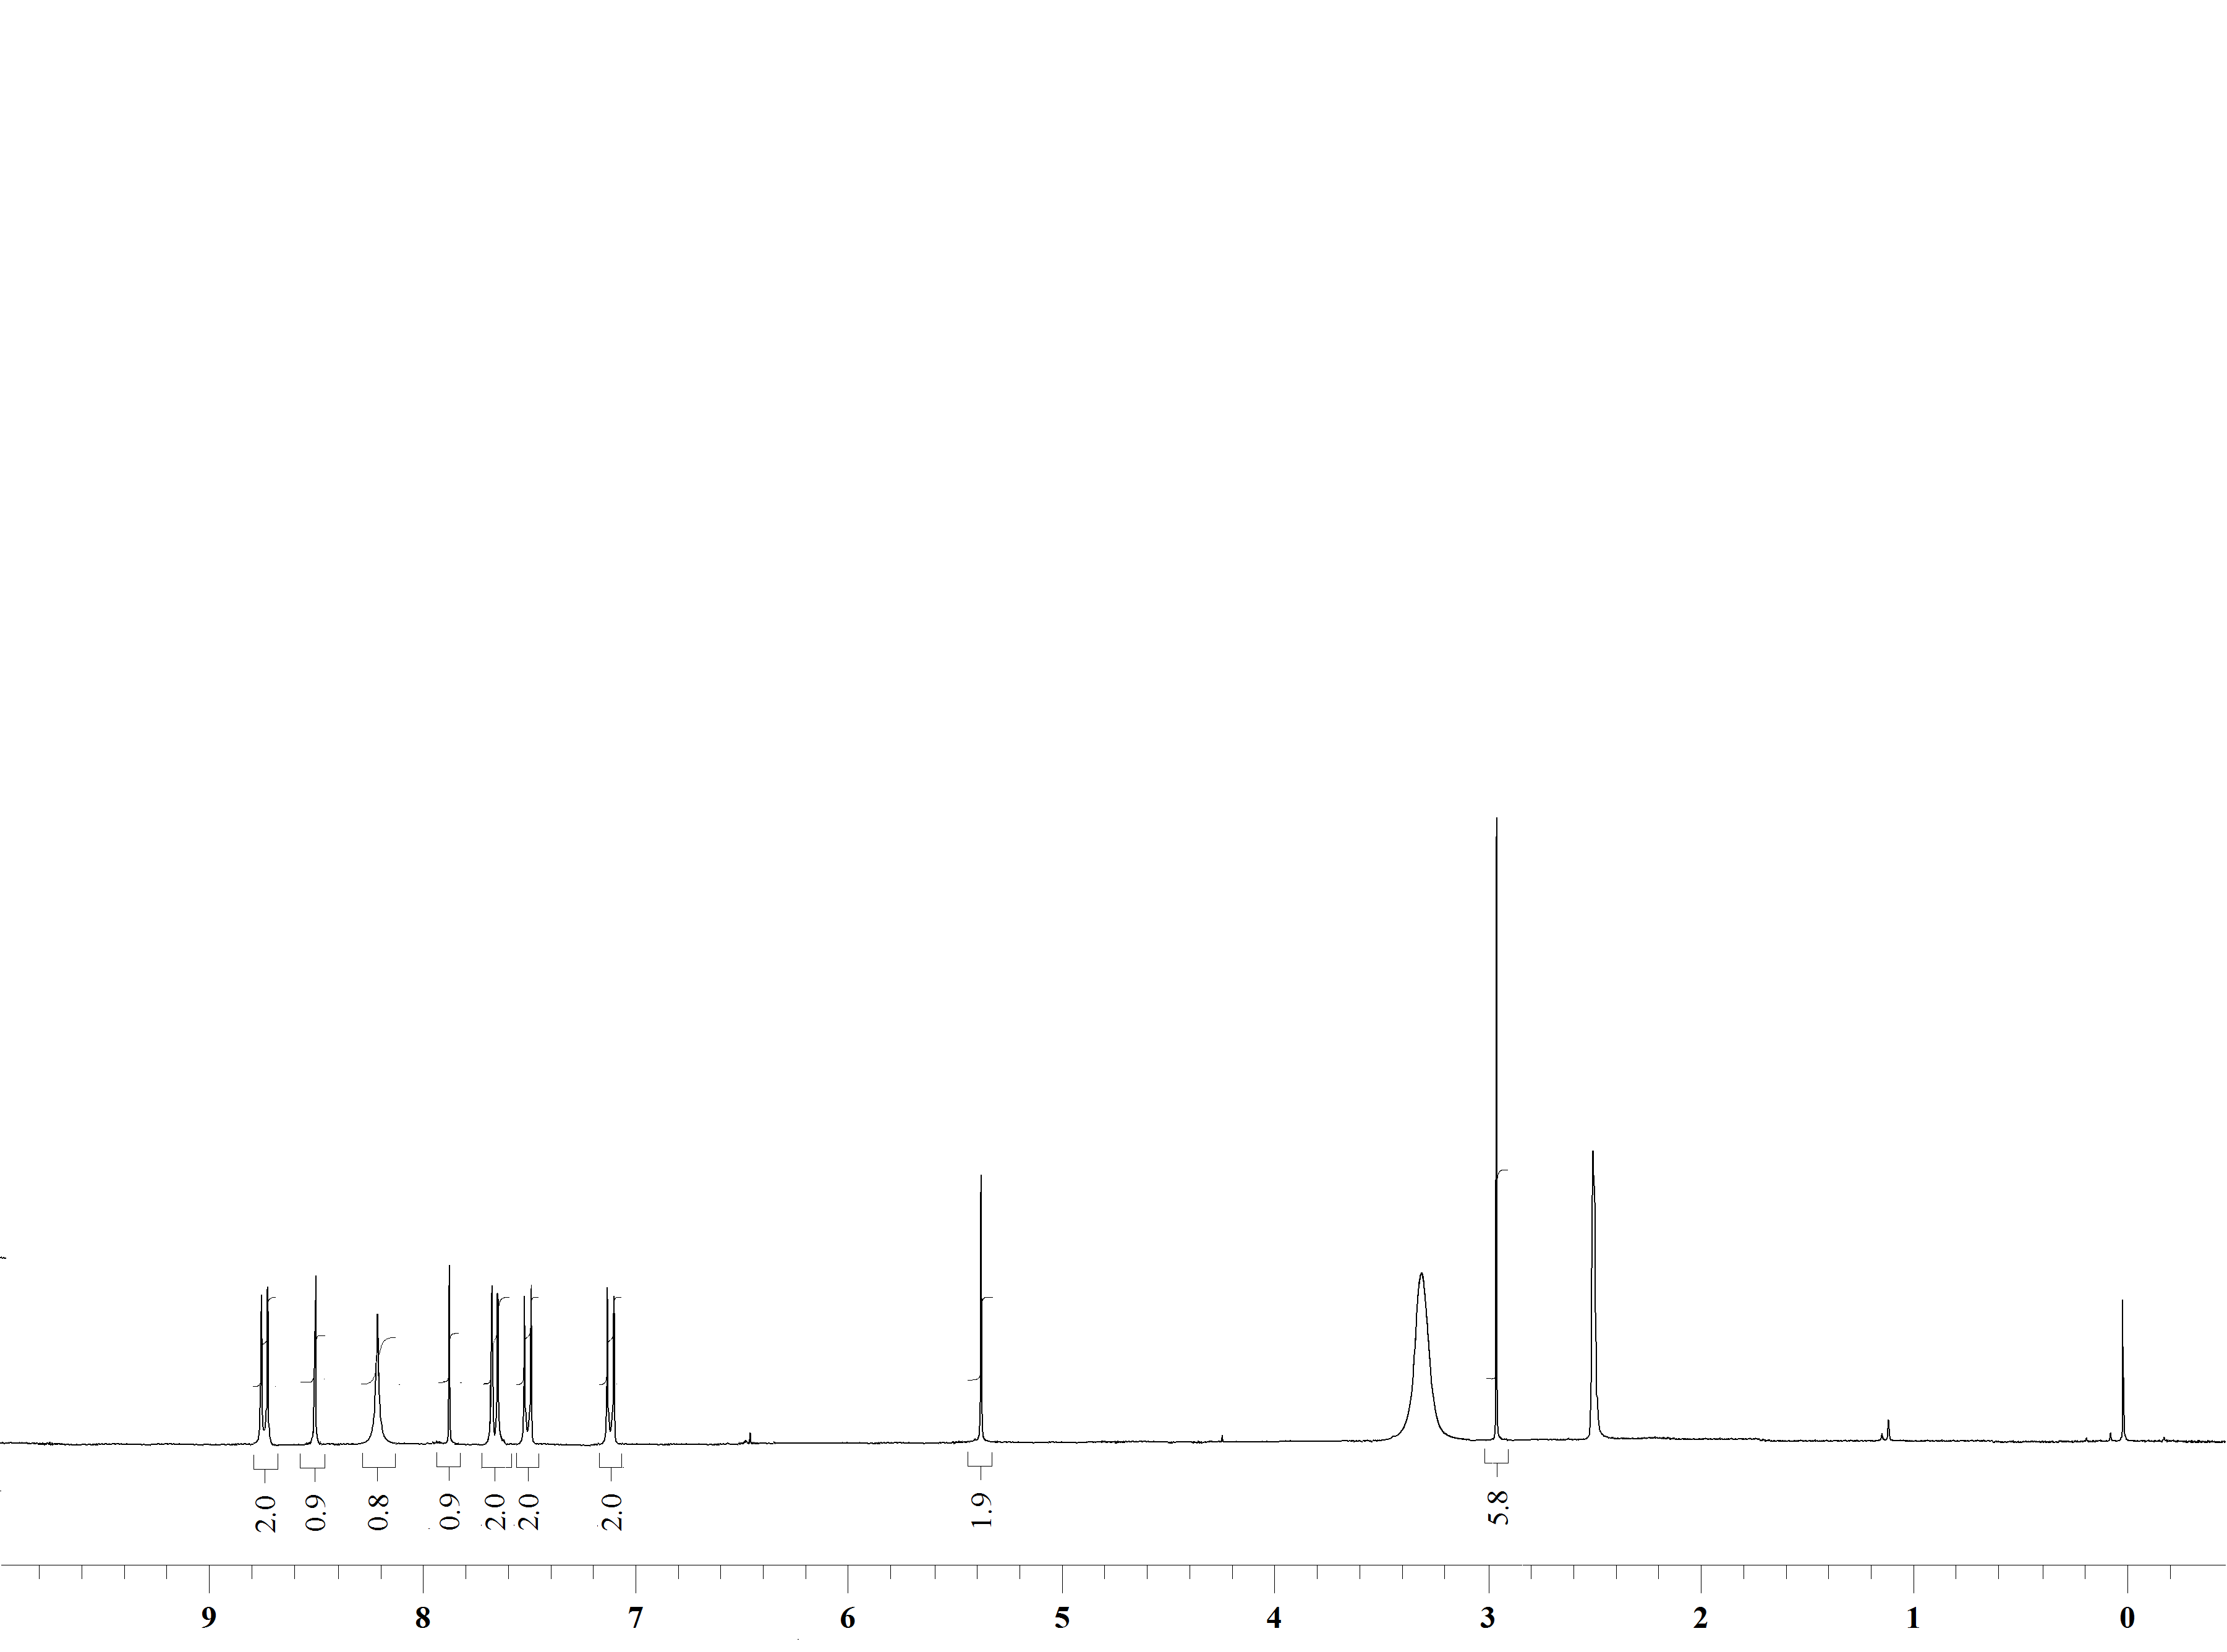


**1H NMR Spectrum of compound 27j in DMSO-*d6*(400 MHz)**


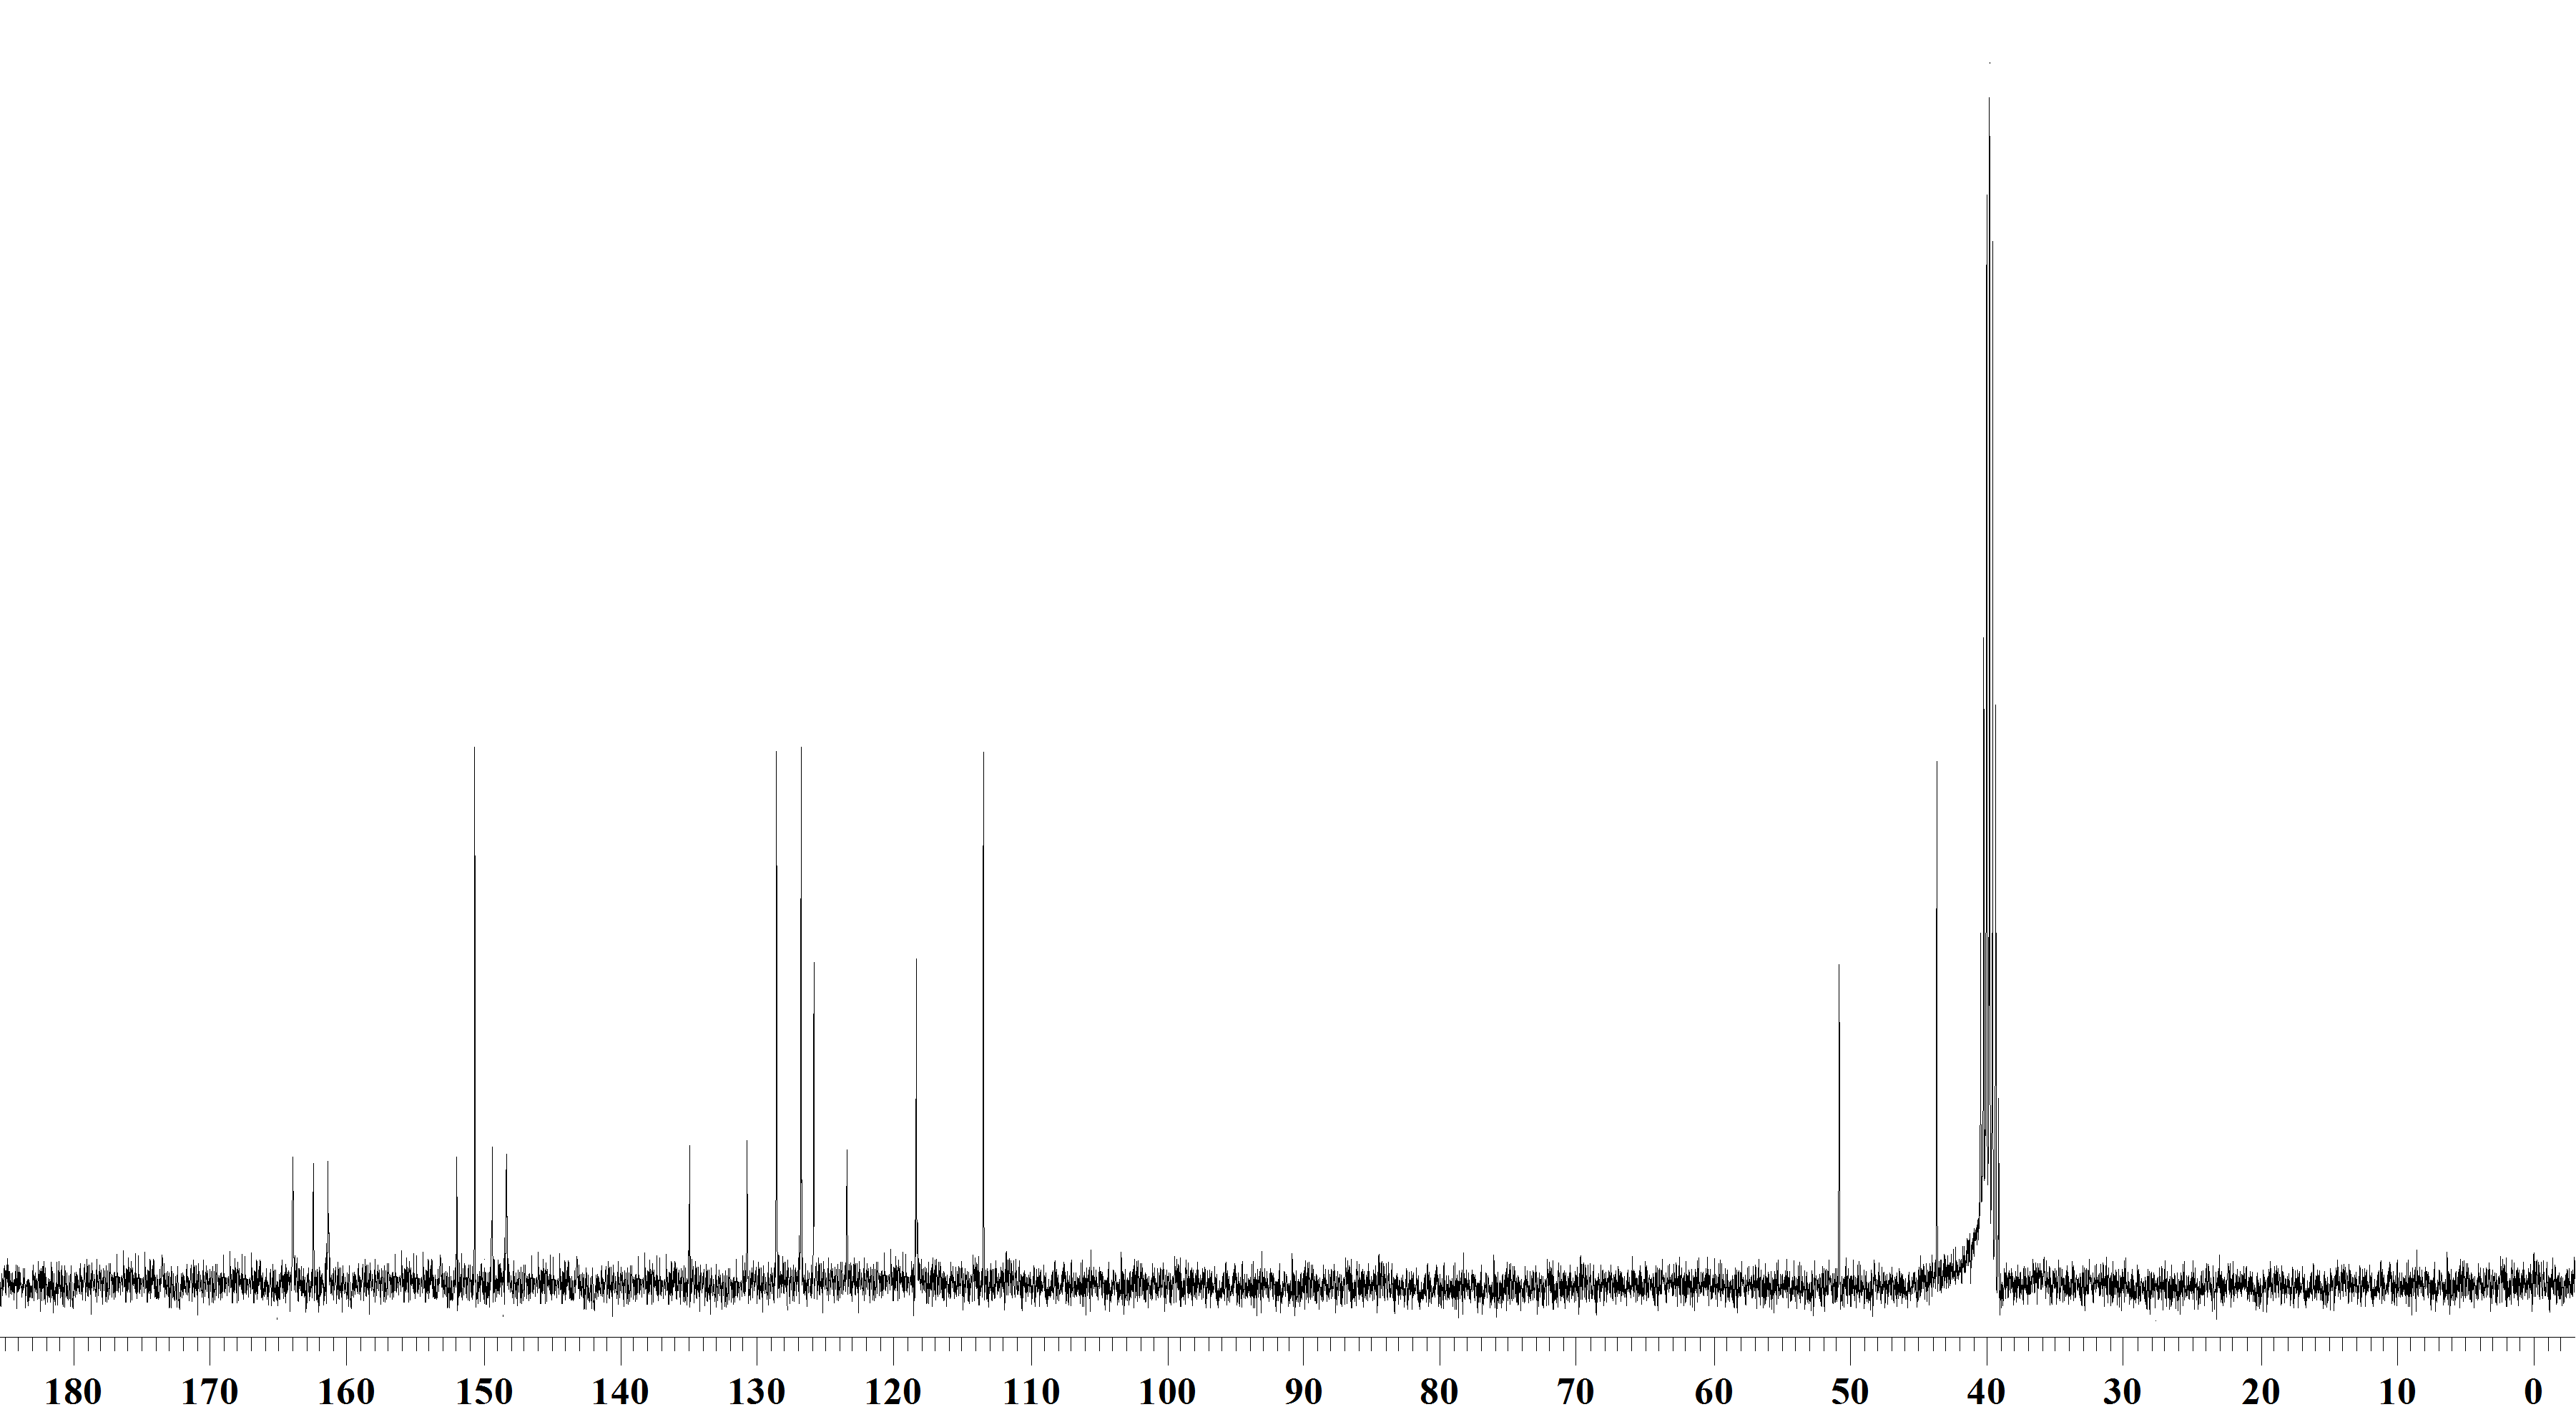


**13C NMR Spectrum of compound 27j in DMSO-*d6*(100 MHz)**
